# Supplementary material
Source: PubMed Central journal article supplement (PMC4801758)
Supplement: NIHMS755090-supplement-Supp_Table_S1-S3.pdf [file NIHMS755090-supplement-Supp_Table_S1-S3.pdf]

## SUPPORTING TABLES

Table S1. Frontal petalia scoring. Presence (yes/no, 1/0) and direction (right/left, 2/1) of the frontal petalia were both logged.

| ID     | Sex | Age   | petalia_yn | petalia_rl |
|--------|-----|-------|------------|------------|
| UN001  | M   |       | 1          | 2          |
| 7777   | M   | 13.07 | 1          | 2          |
| 1X4045 | F   | 19.35 | 1          | 2          |
| 1X1786 | F   | 22.99 | 1          | 1          |
| UN002  | F   |       | 1          | 2          |
| 7446   | M   | 13.69 | 1          | 2          |
| 1X2699 | F   | 27.43 | 1          | 1          |
| 1X1957 | F   | 28.10 | 1          | 1          |
| 9099   | M   | 11.55 | 1          | 1          |
| 1X3771 | F   | 20.33 | 1          | 2          |
| 1X3026 | M   | 21.63 |            |            |
| 1X1687 | F   | 22.90 | 1          | 2          |
| 8600   | M   | 11.84 | 0          |            |
| 12639  | M   | 12.18 | 1          | 2          |
| 8046   | M   | 13.13 | 1          | 1          |
| 1X4038 | F   | 19.19 | 1          | 1          |
| 1X3939 | F   | 19.74 | 1          | 2          |
| 1X3475 | M   | 20.66 | 1          | 2          |
| 7645   | F   | 12.01 | 1          | 2          |
| 1X4217 | F   | 18.61 | 1          | 2          |
| 8979   | M   | 11.01 | 1          | 2          |
| 1X4166 | F   | 18.23 | 1          | 2          |
| 1X4749 | F   | 16.07 | 1          | 1          |
| 6215   | F   | 15.50 | 1          | 2          |
| 1X4710 | F   | 15.90 | 1          | 2          |
| 1X3740 | F   | 19.34 | 1          | 1          |
| 1X2081 | F   | 22.38 | 0          |            |
| 1X1181 | F   | 31.17 | 1          | 2          |
| 1X0681 | F   | 31.03 | 1          | 2          |
| 1X3782 | F   | 19.98 | 1          | 1          |
| 1X2315 | F   | 21.77 | 0          |            |
| 7329   | M   | 14.08 | 0          |            |
| 1X4765 | F   | 15.89 | 1          | 1          |
| 10403  | M   | 9.13  | 1          | 2          |
| 1X2686 | F   | 30.30 | 1          | 2          |
| 1X3200 | F   | 21.07 | 1          | 1          |
| 1X0842 | F   | 33.19 | 1          | 1          |
| 1X4632 | M   | 16.52 |            |            |
| 1X2813 | F   | 21.12 | 0          |            |
| 1X2644 | F   | 27.60 | 1          | 2          |
| 9765   | F   | 10.32 | 1          | 1          |
| 1X4519 | F   | 21.97 | 0          |            |

|        |   |       |   |   |
|--------|---|-------|---|---|
| 1X4156 | F | 17.97 | 1 | 2 |
| 8681   | F | 12.12 |   |   |
| 1X0976 | M | 23.80 | 1 | 2 |
| 1X1177 | F | 28.64 | 1 | 2 |
| 6450   | M | 14.96 | 1 | 1 |
| 10603  | F | 8.57  | 1 | 2 |
| 1X4777 | M | 16.02 |   |   |
| 1X3310 | M | 18.21 | 1 | 2 |
| 1X2231 | M | 20.70 | 1 | 1 |
| 1X3337 | F | 22.96 | 1 | 2 |
| 1X2624 | F | 25.80 | 0 |   |
| 1X3808 | F | 18.82 | 1 | 2 |
| 1X3818 | M | 18.42 | 1 | 2 |
| 8576   | M | 10.55 | 1 | 2 |
| 1X2822 | M | 19.82 | 1 | 2 |
| 8395   | F | 10.64 | 1 | 1 |
| 7633   | M | 11.68 | 1 | 2 |
| 1X3930 | F | 17.92 | 1 | 2 |
| 6415   | M | 13.41 | 1 | 1 |
| 1X4286 | M | 16.74 | 1 | 2 |
| 8058   | F | 10.02 | 1 | 1 |
| 1X4162 | F | 17.34 | 1 | 1 |
| 1X3758 | M | 18.79 |   |   |
| 8229   | M | 11.04 |   |   |
| 1X2576 | M | 20.53 |   |   |
| 1X2816 | M | 19.85 | 1 | 2 |
| 1X2884 | F | 20.36 | 1 | 2 |
| 8120   | M | 10.86 | 1 | 1 |
| 1X3823 | F | 18.90 | 0 |   |
| 9021   | F | 12.04 | 1 | 2 |
| 1X3701 | F | 18.68 | 1 | 2 |
| 1X3764 | F | 18.18 | 1 | 2 |
| 7478   | F | 12.12 | 1 | 2 |
| 9090   | M | 9.32  | 0 |   |
| 1X2360 | F | 20.25 | 1 | 1 |
| 1X4802 | M | 13.92 | 1 | 2 |
| 1X1447 | M | 21.06 | 1 | 2 |
| 7126   | F | 12.68 | 1 | 2 |
| 1X4782 | M | 15.66 |   |   |
| 1X3783 | F | 19.88 | 1 | 2 |
| 1X4767 | F | 16.20 | 1 | 2 |
| 8250   | F | 9.24  | 1 | 2 |
| 6649   | F | 11.70 | 1 | 2 |
| 1X4184 | F | 15.80 | 1 | 2 |
| 1X4146 | F | 16.11 | 1 | 2 |
| 6284   | F | 12.90 | 1 | 2 |
| 1X0351 | F | 29.48 | 1 | 2 |
| 1X4051 | F | 17.05 | 0 |   |
| 1X3705 | M | 17.72 | 1 | 2 |

|        |   |       |   |   |
|--------|---|-------|---|---|
| 1X1257 | M | 22.04 | 1 | 2 |
| 1X0684 | F | 28.01 | 1 | 2 |
| 1X2495 | F | 26.09 | 0 |   |
| 1X3805 | F | 17.79 | 1 | 2 |
| 8282   | F | 9.68  | 1 | 2 |
| 1X4064 | F | 16.95 | 1 | 2 |
| 1X1958 | F | 25.00 | 1 | 2 |
| 1X4186 | M | 15.85 | 1 | 2 |
| 1X1224 | F | 28.01 | 1 | 2 |
| 1X3997 | M | 16.15 | 1 | 1 |
| 1X3255 | F | 27.77 | 0 |   |
| 1X3162 | M | 22.87 |   |   |
| 1X4703 | F | 12.91 |   |   |
| 8928   | M | 8.94  | 0 |   |
| 1X3899 | M | 16.51 | 1 | 2 |
| 1B0831 | M | 27.03 | 1 | 2 |
| 1X4842 | M | 13.23 | 1 | 2 |
| 8638   | F | 10.25 | 0 |   |
| 1X1146 | F | 29.40 | 1 | 1 |
| 1X3790 | F | 17.22 | 1 | 2 |
| 9279   | F | 11.99 | 1 | 2 |
| 1X3828 | M | 20.54 |   |   |
| 1X3195 | F | 22.10 | 1 | 2 |
| 1X3597 | F | 21.17 | 1 | 1 |
| 1X1374 | F | 25.00 |   |   |
| 1X3567 | F | 21.47 | 1 | 2 |
| 1X1032 | F | 27.99 | 1 | 2 |
| 1X0937 | F | 26.07 | 1 | 2 |
| 1X4090 | F | 19.66 | 1 | 2 |
| 1X2063 | M | 23.99 |   |   |
| 1X4820 | F | 16.39 | 0 |   |
| 1X2054 | F | 31.86 |   |   |
| 1X4290 | F | 19.35 |   |   |
| 9481   | F | 12.02 | 1 | 2 |
| 1X2365 | F | 23.18 | 1 | 2 |
| 1X3809 | M | 20.68 | 1 | 1 |
| 1X3648 | F | 21.84 | 0 |   |
| 1X4091 | F | 19.73 | 1 | 2 |
| 1X3593 | F | 19.65 | 1 | 2 |
| 1X3679 | F | 20.87 | 1 | 1 |
| 1X3655 | M | 19.86 | 1 | 2 |
| 9347   | M | 10.27 | 1 | 1 |
| 1X4810 | M | 16.67 | 1 | 2 |
| 6451   | M | 16.24 | 1 | 1 |
| 9740   | F | 11.09 | 1 | 2 |
| 1X2798 | F | 23.09 | 1 | 2 |
| 8877   | F | 12.32 | 1 | 1 |
| 7445   | M | 13.05 | 1 | 2 |
| 1X2891 | M | 27.98 |   |   |

|        |   |       |   |   |
|--------|---|-------|---|---|
| 1X1763 | F | 24.18 |   |   |
| 1X2172 | F | 29.17 | 1 | 2 |
| 1X2511 | F | 27.60 |   |   |
| 1X3887 | M | 20.42 |   |   |
| 9344   | F | 9.91  |   |   |
| 1X3837 | M | 20.57 | 1 | 2 |
| 1X4230 | F | 19.12 |   |   |
| 1X3291 | F | 22.13 | 1 | 2 |
| 1X4019 | F | 20.37 | 0 |   |
| 1X4331 | M | 19.09 |   |   |
| 1X0864 | F | 26.18 |   |   |
| 1X3564 | F | 22.13 |   |   |
| 1X4634 | M | 17.92 | 1 | 2 |
| 8066   | M | 13.70 |   |   |
| 1X3822 | M | 20.95 |   |   |
| 1X2379 | F | 23.37 | 1 | 1 |
| 1X3902 | F | 20.70 |   |   |
| 10316  | F | 10.30 | 1 | 2 |
| 1X2602 | F | 23.21 |   |   |
| 1X1656 | F | 22.62 |   |   |
| 1X3103 | F | 22.61 | 1 | 2 |
| 1X3432 | F | 22.24 | 1 | 2 |
| 8581   | F | 13.19 |   |   |
| 1X2794 | M | 23.21 |   |   |
| 8010   | M | 12.05 | 1 | 2 |
| 1X4748 | M | 17.19 | 1 | 1 |
| 1X4041 | F | 18.22 | 1 | 2 |
| 6218   | M | 16.76 | 0 |   |
| 9045   | F | 12.73 | 1 | 2 |
| 1X1879 | F | 24.25 |   |   |
| 1X1237 | F | 28.99 | 1 | 1 |
| 1X1734 | F | 29.67 |   |   |
| 6626   | F | 15.37 |   |   |
| 8302   | F | 13.41 | 0 |   |
| 8973   | F | 12.69 |   |   |
| 1X2538 | F | 27.87 |   |   |
| 1X2092 | F | 22.11 | 1 | 2 |
| 9039   | F | 12.33 | 1 | 2 |
| 8864   | F | 10.96 |   |   |
| 1X4294 | F | 19.35 | 1 | 2 |
| 10195  | F | 9.49  |   |   |
| 1X2269 | F | 23.74 | 1 | 2 |
| 1X4323 | M | 19.16 | 1 | 1 |
| 10729  | M | 8.97  | 1 | 2 |
| 9643   | M | 13.94 | 0 |   |
| 1X3867 | M | 21.10 | 1 | 2 |
| 1X3144 | M | 22.75 | 1 | 1 |
| 1X2033 | M | 20.92 | 1 | 2 |
| 9472   | M | 11.81 | 1 | 2 |

|        |   |       |   |   |
|--------|---|-------|---|---|
| 1X3594 | F | 19.85 | 1 | 2 |
| 1X3767 | F | 20.87 | 1 | 2 |
| 9878   | F | 10.97 | 1 | 2 |
| 1X2675 | F | 31.62 |   |   |
| 1X4108 | F | 20.34 | 1 | 2 |
| 1X2490 | F | 27.93 | 1 | 1 |
| 1X4853 | M | 17.21 |   |   |
| 1X4268 | F | 19.67 | 1 | 2 |
| 1X2199 | F | 24.29 | 0 |   |
| 6701   | F | 22.53 | 1 | 1 |
| 1X4183 | F | 20.55 |   |   |
| 1X2713 | F | 23.66 | 1 | 1 |
| 1X3327 | F | 22.82 |   |   |
| 10760  | F | 10.09 | 1 | 2 |
| 7199   | F | 15.52 |   |   |
| 1X2796 | F | 23.39 | 1 | 2 |
| 6860   | F | 16.25 | 1 | 2 |
| 1X3653 | F | 22.01 |   |   |
| 1X3697 | M | 22.18 |   |   |
| 7937   | M | 14.50 |   |   |
| 6965   | M | 15.32 | 1 | 2 |
| 11446  | M | 25.35 |   |   |
| 10226  | M | 11.21 | 1 | 1 |
| 1X3052 | F | 31.14 | 1 | 2 |
| 1X1956 | F | 33.70 | 1 | 2 |
| 1X1404 | F | 31.69 | 1 | 2 |
| 1X4154 | M | 20.11 | 1 | 2 |
| 8000   | F | 14.62 | 1 | 2 |
| 1X3707 | F | 22.17 |   |   |
| 1X4326 | M | 19.15 |   |   |
| 9502   | F | 12.37 | 1 | 2 |
| 6977   | M | 15.54 | 1 | 2 |
| 1X4035 | F | 21.02 | 0 |   |
| 1X3521 | F | 22.87 | 1 | 2 |
| 1X1166 | F | 26.61 | 1 | 2 |
| 1X3581 | M | 22.84 |   |   |
| 1X4179 | M | 20.80 | 1 | 1 |
| 18741  | F | 10.93 | 1 | 2 |
| 1X3960 | M | 21.69 | 1 | 2 |
| 1X3819 | M | 22.20 |   |   |
| 1X4058 | F | 21.17 | 1 | 1 |
| 9641   | M | 12.71 | 1 | 2 |
| 1X4771 | F | 18.02 | 1 | 2 |
| 1X2509 | F | 28.98 | 1 | 2 |
| 1X1962 | F | 29.97 | 1 | 2 |
| 1X4209 | M | 20.82 | 1 | 2 |
| 1X3431 | M | 23.11 |   |   |
| 8635   | F | 14.06 | 1 | 2 |
| 8296   | F | 16.54 | 1 | 2 |

|        |   |       |   |   |
|--------|---|-------|---|---|
| 8129   | F | 16.56 | 1 | 2 |
| 1X3928 | F | 23.87 | 0 |   |
| 6746   | F | 18.41 |   |   |
| 10154  | F | 13.69 | 1 | 2 |
| 10090  | F | 14.01 | 1 | 2 |
| 10510  | F | 12.58 | 1 | 2 |
| 14435  | F | 6.91  | 1 | 2 |
| 10433  | F | 13.27 | 1 | 2 |
| 7635   | F | 17.39 | 1 | 2 |
| 1X4631 | F | 19.98 | 0 |   |
| 8975   | F | 15.16 | 1 | 2 |
| 17812  | F | 18.79 |   |   |
| 1X2000 | F | 26.19 | 1 | 1 |
| 8679   | M | 15.10 | 1 | 2 |
| 10379  | M | 13.24 | 1 | 2 |
| 14187  | F | 6.37  | 1 | 2 |
| 7895   | F | 16.53 | 1 | 1 |
| 7882   | F | 15.90 | 0 |   |
| 7031   | M | 18.04 | 1 | 2 |
| 8251   | M | 16.59 |   |   |
| 1X3956 | F | 22.72 | 0 |   |
| 8021   | M | 16.45 |   |   |
| 1X4329 | F | 21.03 | 0 |   |
| 1X4284 | M | 21.72 | 1 | 2 |
| 11585  | F | 11.09 | 0 |   |
| 8941   | F | 15.06 |   |   |
| 6690   | F | 17.88 | 1 | 2 |
| 14263  | M | 6.61  | 1 | 2 |
| 1X4161 | F | 21.92 | 1 | 1 |
| 1X4647 | M | 20.53 | 1 | 1 |
| 1X3445 | F | 24.34 | 1 | 2 |
| 9020   | F | 20.40 | 1 | 2 |
| 9193   | F | 14.65 | 1 | 2 |
| 1X4236 | F | 21.73 | 1 | 1 |
| 1X4278 | F | 21.98 | 1 | 1 |
| 1X2594 | F | 25.93 | 1 | 1 |
| 1X3548 | F | 27.28 | 1 | 2 |
| 1X2176 | F | 30.48 | 1 | 2 |
| 11442  | F | 28.23 |   |   |
| 11444  | F | 20.65 |   |   |
| 1X3582 | F | 24.07 | 1 | 2 |
| 7621   | F | 16.74 |   |   |
| 1X4031 | F | 23.27 | 1 | 2 |
| 9906   | M | 13.25 |   |   |
| 1X3952 | F | 22.02 | 1 | 1 |
| 12162  | F | 9.88  |   |   |
| 8767   | F | 15.23 | 1 | 2 |
| 1X2572 | F | 26.01 | 1 | 1 |
| 14252  | F | 6.16  | 1 | 2 |

|        |   |       |   |   |
|--------|---|-------|---|---|
| 1X2589 | F | 26.05 | 1 | 2 |
| 14266  | M | 6.99  | 1 | 2 |
| 9288   | F | 14.24 | 1 | 2 |
| 1X3439 | F | 24.21 | 1 | 1 |
| 8597   | F | 15.13 |   |   |
| 7866   | F | 16.38 |   |   |
| 14322  | F | 6.79  | 1 | 2 |
| 10012  | F | 13.59 | 1 | 2 |
| 14081  | M | 6.39  |   |   |
| 1X3420 | M | 24.46 |   |   |
| 1X3883 | F | 23.16 | 1 | 2 |
| 6997   | F | 17.33 | 1 | 2 |
| 1X3814 | F | 23.86 | 0 |   |
| 9789   | F | 14.28 | 1 | 2 |
| 1X3886 | F | 24.47 | 1 | 1 |
| 1X3938 | M | 24.14 |   |   |
| 1X3312 | F | 25.38 | 1 | 2 |
| 14993  | F | 6.27  |   |   |
| 7842   | M | 16.05 |   |   |
| 12929  | M | 9.66  |   |   |
| 14484  | F | 7.34  | 1 | 2 |
| 10611  | F | 13.05 | 1 | 2 |
| 1X3696 | F | 25.38 | 1 | 2 |
| 9716   | F | 13.85 |   |   |
| 1X3864 | M | 24.34 | 1 | 1 |
| 1X2697 | F | 32.47 | 1 | 1 |
| 6354   | F | 19.78 |   |   |
| 1X2717 | F | 26.61 | 0 |   |
| 14373  | F | 6.21  |   |   |
| 1X4418 | M | 22.38 |   |   |
| 1X4022 | M | 22.39 | 1 | 2 |
| 8962   | M | 16.38 | 1 | 1 |
| 12726  | F | 8.83  | 1 | 1 |
| 1X3848 | F | 24.90 | 1 | 1 |
| 1X4265 | F | 22.65 | 1 | 2 |
| 8062   | F | 16.25 | 1 | 2 |
| 6968   | M | 19.09 | 1 | 2 |
| 1X4627 | M | 21.23 | 1 | 2 |
| 15473  | F | 6.23  |   |   |
| 14084  | M | 7.35  | 1 | 2 |
| 1X3739 | F | 24.88 | 1 | 2 |
| 1X4686 | F | 20.87 | 1 | 2 |
| 8070   | M | 17.57 |   |   |
| 15168  | F | 6.83  | 1 | 2 |
| 1X4752 | F | 20.84 | 0 |   |
| 12226  | F | 11.13 | 1 | 1 |
| 10875  | M | 12.50 | 0 |   |
| 1X3929 | F | 24.24 | 1 | 1 |
| 1X3947 | F | 24.01 | 0 |   |

|        |   |       |   |   |
|--------|---|-------|---|---|
| 9089   | F | 16.34 |   |   |
| 14274  | F | 7.55  |   |   |
| 1X2068 | F | 26.09 |   |   |
| 7455   | M | 17.94 | 1 | 2 |
| 1X3347 | M | 25.53 |   |   |
| 13715  | F | 7.58  |   |   |
| 1X4277 | M | 23.25 | 1 | 2 |
| 10016  | F | 14.62 | 1 | 1 |
| 14365  | M | 7.89  | 1 | 1 |
| 1X4246 | F | 22.93 |   |   |
| 1X3641 | F | 25.09 | 0 |   |
| 8369   | M | 17.02 | 1 | 2 |
| 1X3592 | F | 25.42 | 1 | 1 |
| 14744  | M | 6.70  |   |   |
| 9388   | F | 13.76 |   |   |
| 8478   | F | 17.03 | 1 | 2 |
| 1X3796 | M | 24.55 |   |   |
| 8700   | F | 14.32 | 1 | 2 |
| 1X4056 | F | 23.74 | 1 | 2 |
| 1X3846 | F | 24.76 |   |   |
| 1X4303 | F | 22.62 | 1 | 2 |
| 9094   | F | 14.37 | 1 | 2 |
| 7823   | F | 16.38 | 1 | 1 |
| 1X4112 | F | 22.34 | 1 | 1 |
| 10511  | F | 13.32 | 1 | 2 |
| 1X4241 | F | 20.95 | 1 | 1 |
| 1X3731 | F | 24.67 | 1 | 2 |
| 1X3895 | F | 24.67 | 1 | 2 |
| 1X4645 | M | 20.72 | 1 | 2 |
| 6819   | M | 18.93 | 0 |   |
| 14710  | F | 11.24 | 1 | 2 |
| 1X3942 | F | 24.16 |   |   |
| 8919   | F | 14.67 | 1 | 2 |
| 7096   | F | 17.37 | 0 |   |
| 10046  | F | 14.40 | 1 | 2 |
| 7561   | F | 18.44 | 1 | 1 |
| 15110  | M | 7.04  |   |   |
| 10544  | M | 13.38 |   |   |
| 8596   | F | 14.41 | 0 |   |
| 1X4746 | F | 18.35 | 1 | 2 |
| 1X3861 | F | 24.03 | 1 | 2 |
| 1X4859 | M | 19.81 | 1 | 2 |
| 6301   | M | 17.59 | 0 |   |
| 1X4808 | M | 20.55 | 1 | 2 |
| 1X3817 | F | 24.65 | 1 | 2 |
| 1X2001 | F | 27.40 |   |   |
| 9774   | F | 13.74 | 1 | 2 |
| 8313   | F | 16.68 | 1 | 1 |
| 11617  | F | 11.95 | 0 |   |



|        |   |       |   |   |
|--------|---|-------|---|---|
| 1X1927 | F | 25.78 |   |   |
| 13859  | F | 8.44  | 1 | 1 |
| 1X4257 | F | 22.98 | 1 | 1 |
| 1X2825 | F | 26.37 | 1 | 2 |
| 1X2716 | F | 26.21 | 1 | 2 |
| 6949   | F | 18.85 | 1 | 1 |
| 6933   | F | 17.63 |   |   |
| 1X4276 | F | 20.80 | 0 |   |
| 1X2124 | F | 27.26 |   |   |
| 1X4013 | M | 22.02 |   |   |
| 7944   | M | 16.15 |   |   |
| 9316   | F | 16.46 |   |   |
| 1X4687 | F | 21.38 | 1 | 2 |
| 11992  | F | 11.83 |   |   |
| 14696  | F | 7.73  | 1 | 2 |
| 1X2684 | F | 29.82 | 1 | 2 |
| 1X2117 | F | 25.54 | 0 |   |
| 1X4169 | F | 23.10 | 1 | 2 |
| 1X4648 | M | 21.62 | 1 | 2 |
| 9892   | M | 15.28 | 1 | 2 |
| 1X3810 | F | 23.52 | 1 | 2 |
| 1X3104 | F | 23.76 | 1 | 1 |
| 6521   | F | 20.29 | 0 |   |
| 6725   | M | 17.17 | 1 | 1 |
| 1X1441 | F | 27.21 | 1 | 2 |
| 1X3914 | F | 22.16 |   |   |
| 1X4239 | F | 21.06 |   |   |
| 8001   | M | 15.99 |   |   |
| 16118  | F | 6.04  | 1 | 2 |
| 7634   | F | 18.76 | 1 | 2 |
| 8820   | F | 15.04 | 0 |   |
| 16033  | F | 6.31  |   |   |
| 9623   | F | 13.41 | 0 |   |
| 1X4143 | F | 24.20 | 0 |   |
| 1X3208 | F | 23.66 | 0 |   |
| 1X4149 | F | 24.34 | 1 | 2 |
| 8318   | M | 15.31 |   |   |
| 1X4315 | M | 20.94 | 1 | 2 |
| 10418  | F | 11.49 | 0 |   |
| 6821   | M | 17.29 | 1 | 2 |
| 10240  | M | 12.30 | 1 | 2 |
| 10009  | F | 12.60 | 1 | 2 |
| 9581   | F | 13.09 |   |   |
| 1X4867 | F | 17.85 |   |   |
| 8885   | M | 16.79 | 1 | 2 |
| 1X4637 | M | 18.86 | 1 | 2 |
| 1X3666 | F | 23.22 | 1 | 2 |
| 1X1557 | F | 28.91 | 1 | 1 |
| 9791   | F | 15.38 | 1 | 1 |

|        |   |       |   |   |
|--------|---|-------|---|---|
| 1X1864 | F | 28.58 | 1 | 2 |
| 8778   | F | 16.91 | 1 | 2 |
| 1X4760 | M | 18.30 | 1 | 2 |
| 7380   | M | 16.29 | 1 | 2 |
| 1X1577 | F | 25.96 | 1 | 2 |
| 14754  | M | 7.90  | 1 | 1 |
| 8292   | M | 17.84 | 1 | 2 |
| 7158   | M | 16.67 | 0 |   |
| 8644   | M | 17.40 | 0 |   |
| 10987  | F | 13.41 | 1 | 2 |
| 10911  | F | 13.55 | 0 |   |
| 1X3836 | F | 25.44 |   |   |
| 9907   | F | 15.62 | 1 | 2 |
| 1X3757 | M | 22.62 |   |   |
| 1X4314 | F | 21.00 | 1 | 2 |
| 11079  | F | 13.18 | 1 | 2 |
| 8221   | M | 15.47 | 1 | 1 |
| 1X2574 | F | 24.77 | 1 | 2 |
| 1X3749 | F | 25.45 |   |   |
| 1X4195 | F | 21.27 | 1 | 1 |
| 11443  | F | 17.57 | 0 |   |
| 11445  | M | 22.67 |   |   |
| 6732   | F | 20.34 | 1 | 2 |
| 9976   | M | 15.89 |   |   |
| 10074  | F | 15.53 | 1 | 2 |
| 12217  | F | 11.92 | 1 | 2 |
| 6265   | M | 20.96 |   |   |
| 15656  | M | 7.00  | 1 | 1 |
| 8780   | M | 17.45 | 1 | 2 |
| 7430   | F | 19.44 | 1 | 2 |
| 7190   | M | 19.67 | 0 |   |
| 18744  | F | 8.55  | 1 | 2 |
| 1X4033 | F | 24.90 | 1 | 1 |
| 1X4721 | M | 21.73 | 1 | 2 |
| 15988  | M | 6.73  | 1 | 2 |
| 7438   | M | 19.24 | 1 | 2 |
| 7438   | M | 19.24 | 1 | 2 |
| 7438   | M | 19.24 | 1 | 2 |
| 7438   | M | 19.24 | 1 | 2 |
| 1X4222 | F | 24.40 | 0 |   |
| 16386  | F | 6.13  | 1 | 2 |
| 14979  | M | 7.92  | 1 | 2 |
| 15634  | M | 7.06  | 1 | 2 |
| 16560  | M | 6.02  | 0 |   |
| 7472   | M | 19.95 | 1 | 2 |
| 8027   | M | 18.94 | 1 | 2 |
| 1X4308 | F | 23.65 | 1 | 2 |
| 9805   | F | 16.57 | 1 | 1 |
| 1X4039 | F | 25.12 | 1 | 2 |

|        |   |       |   |   |
|--------|---|-------|---|---|
| 1X4082 | F | 25.23 | 1 | 2 |
| 1X4069 | F | 25.52 | 0 |   |
| 8291   | F | 18.50 | 1 | 1 |
| 1X4096 | M | 24.71 | 1 | 2 |
| 1X3926 | F | 25.87 | 0 |   |
| 8299   | F | 18.52 | 1 | 2 |
| 12480  | F | 11.96 | 0 |   |
| 14695  | F | 8.54  | 1 | 2 |
| 8469   | M | 18.52 |   |   |
| 6776   | F | 25.15 | 1 | 2 |
| 1X4714 | F | 18.28 | 1 | 2 |
| 1X3882 | F | 25.50 | 1 | 2 |
| 8329   | M | 18.02 | 1 | 2 |
| 1X2100 | F | 24.96 | 1 | 1 |
| 8034   | F | 19.16 | 1 | 2 |
| 15155  | M | 7.77  | 0 |   |
| 6585   | M | 21.06 | 1 | 2 |
| 6716   | M | 20.37 | 1 | 2 |
| 16495  | F | 6.62  | 1 | 1 |
| 1X3637 | F | 26.53 | 1 | 1 |
| 1X4792 | F | 21.95 | 1 | 1 |
| 1X4273 | F | 23.76 | 0 |   |
| 15976  | M | 6.97  | 1 | 2 |
| 1X4121 | F | 24.68 | 1 | 2 |
| 8008   | M | 18.33 |   |   |
| 14962  | M | 7.89  |   |   |
| 1X4741 | M | 11.58 | 1 | 2 |
| 1X4006 | F | 25.03 | 1 | 2 |
| 10740  | F | 14.39 | 1 | 1 |
| 6840   | F | 20.22 | 1 | 1 |
| 12466  | F | 12.12 | 1 | 1 |
| 13968  | M | 9.39  |   |   |
| 1X4221 | M | 11.92 | 0 |   |
| 14270  | F | 9.37  | 1 | 2 |
| 13758  | F | 9.85  | 0 |   |
| 1X4837 | F | 21.15 | 1 | 2 |
| 8517   | M | 18.19 | 1 | 1 |
| 6355   | F | 21.04 |   |   |
| 1X4251 | F | 24.72 | 1 | 1 |
| 1X4228 | F | 24.16 |   |   |
| 13751  | M | 10.02 |   |   |
| 1X3351 | F | 27.27 | 1 | 2 |
| 12157  | F | 12.50 | 0 |   |
| 9545   | F | 17.88 | 1 | 1 |
| 10430  | F | 16.37 | 1 | 1 |
| 16725  | M | 7.15  |   |   |
| 15162  | F | 9.14  |   |   |
| 9305   | F | 18.21 | 1 | 2 |
| 8906   | M | 18.88 | 1 | 2 |

|        |   |       |   |   |
|--------|---|-------|---|---|
| 1X4092 | F | 26.28 | 0 |   |
| 1X3786 | F | 27.48 |   |   |
| 10099  | F | 17.08 | 1 | 2 |
| 15506  | F | 8.25  | 1 | 2 |
| 1X3812 | F | 27.36 |   |   |
| 9771   | F | 18.25 | 1 | 2 |
| 13125  | M | 12.04 | 0 |   |
| 12411  | F | 13.25 | 1 | 2 |
| 15538  | F | 7.66  |   |   |
| 15654  | M | 7.63  | 1 | 1 |
| 1X4178 | F | 18.37 |   |   |
| 6802   | F | 21.81 | 0 |   |
| 1X4866 | F | 22.06 | 0 |   |
| 9356   | M | 10.46 | 1 | 2 |
| 1X3687 | F | 30.16 | 1 | 2 |
| 1X3027 | F | 28.69 | 1 | 2 |
| 1X2996 | F | 28.68 | 0 |   |
| 9166   | F | 22.31 | 1 | 2 |
| 7920   | F | 20.08 | 1 | 2 |
| 6609   | M | 21.46 |   |   |
| 8427   | M | 19.22 |   |   |
| 1X3948 | F | 26.86 | 1 | 1 |
| 7855   | F | 20.20 |   |   |
| 7002   | F | 21.06 | 0 |   |
| 9468   | F | 17.79 | 1 | 1 |
| 1X4165 | F | 25.84 | 1 | 2 |
| 16330  | M | 7.62  | 1 | 1 |
| 9969   | F | 16.61 | 1 | 2 |
| 9092   | F | 18.12 | 1 | 2 |
| 9338   | F | 17.98 | 1 | 2 |
| 9363   | F | 17.79 | 1 | 2 |
| 7248   | F | 26.95 | 1 | 2 |
| 1X2361 | F | 29.42 | 1 | 1 |
| 12175  | F | 13.32 | 1 | 2 |
| 9515   | F | 17.85 | 1 | 2 |
| 16576  | M | 6.65  | 0 |   |
| 10153  | F | 16.57 | 1 | 2 |
| 7052   | M | 21.25 | 1 | 2 |
| 14758  | M | 9.35  |   |   |
| 7210   | F | 20.52 | 0 |   |
| 15828  | M | 7.61  | 1 | 2 |
| 9326   | M | 17.62 | 1 | 2 |
| 9494   | F | 17.29 | 1 | 2 |
| 15139  | M | 8.90  |   |   |
| 1X3428 | F | 27.55 | 1 | 2 |
| 15527  | M | 8.15  | 1 | 2 |
| 9097   | M | 18.00 | 1 | 2 |
| 8615   | M | 18.81 |   |   |
| 17304  | F | 5.97  | 0 |   |

|        |   |       |   |   |
|--------|---|-------|---|---|
| 15217  | M | 8.82  | 1 | 1 |
| 14275  | M | 10.00 |   |   |
| 26327  | F | 2.41  | 1 | 2 |
| 10520  | F | 15.87 | 1 | 2 |
| 9562   | M | 17.43 | 1 | 2 |
| 8465   | M | 18.74 | 0 |   |
| 2X0236 | F | 25.84 | 1 | 2 |
| 11015  | F | 14.69 | 1 | 1 |
| 14995  | M | 9.09  | 1 | 2 |
| 6222   | F | 22.94 | 1 | 1 |
| 6311   | F | 22.55 | 1 | 1 |
| 1X3765 | F | 27.59 | 1 | 1 |
| 15584  | M | 8.65  | 1 | 2 |
| 11001  | F | 15.37 | 1 | 2 |
| 9656   | M | 17.85 | 1 | 2 |
| 1X2384 | F | 29.59 | 1 | 2 |
| 8765   | M | 19.06 | 0 |   |
| 7294   | F | 21.39 | 1 | 2 |
| 9486   | M | 18.06 | 1 | 2 |
| 1X4077 | F | 26.47 | 1 | 2 |
| 1X3690 | F | 29.33 | 1 | 2 |
| 1X4642 | F | 23.87 | 1 | 1 |
| 1X4638 | F | 23.79 | 0 |   |
| 6290   | F | 22.86 | 1 | 2 |
| 15150  | M | 9.49  | 1 | 2 |
| 1X4593 | F | 24.37 | 1 | 1 |
| 1X4213 | F | 26.08 | 1 | 1 |
| 1X4615 | F | 24.07 | 1 | 2 |
| 7500   | M | 20.93 |   |   |
| 7211   | F | 21.48 | 1 | 2 |
| 6342   | F | 22.71 | 1 | 2 |
| 18749  | F | 6.45  | 1 | 2 |
| 10509  | F | 16.52 | 1 | 2 |
| 7963   | M | 20.16 | 1 | 2 |
| 9265   | F | 18.47 | 1 | 2 |
| 15444  | F | 9.09  | 1 | 2 |
| 1X3671 | F | 29.33 | 1 | 2 |
| 1X3774 | F | 27.59 | 1 | 2 |
| 1X4052 | F | 26.77 | 1 | 1 |
| 15283  | M | 9.31  | 1 | 2 |
| 11769  | F | 14.04 | 1 | 2 |
| 11439  | M | 16.33 | 1 | 2 |
| 11581  | F | 14.87 | 1 | 2 |
| 1X4851 | F | 21.84 | 1 | 2 |
| 16742  | M | 7.65  | 1 | 2 |
| 14286  | M | 10.78 | 1 | 2 |
| 8094   | F | 20.68 | 1 | 2 |
| 17243  | F | 7.12  | 1 | 2 |
| 9156   | F | 19.16 | 1 | 2 |

|        |   |       |   |   |
|--------|---|-------|---|---|
| 18746  | F | 7.00  | 1 | 2 |
| 7850   | M | 20.84 | 1 | 2 |
| 9722   | F | 18.22 | 1 | 2 |
| 1X4736 | M | 23.88 | 1 | 2 |
| 6668   | F | 22.36 | 0 |   |
| 11499  | F | 14.63 | 1 | 2 |
| 17214  | M | 7.31  | 1 | 2 |
| 14204  | F | 10.97 | 1 | 2 |
| 14508  | M | 10.58 | 1 | 2 |
| 15539  | M | 9.44  | 1 | 1 |
| 8690   | F | 19.49 | 1 | 2 |
| 6738   | F | 22.54 | 1 | 2 |
| 1X4248 | F | 26.19 | 1 | 1 |
| 8797   | F | 19.59 | 1 | 1 |
| 9914   | F | 17.78 | 1 | 2 |
| 1X4779 | F | 24.01 | 1 | 2 |
| 6756   | F | 22.32 | 1 | 2 |
| 9278   | F | 19.23 | 1 | 2 |
| 9576   | F | 18.88 | 1 | 2 |
| 9625   | M | 18.80 | 1 | 2 |
| 7267   | F | 22.06 | 1 | 2 |
| 15293  | F | 18.89 | 1 | 2 |
| 9340   | M | 19.14 | 1 | 1 |
| 14044  | F | 11.28 | 1 | 2 |
| 14983  | F | 10.13 | 1 | 2 |
| 17331  | M | 7.18  | 0 |   |
| 1X4611 | F | 24.83 | 1 | 1 |
| 8807   | M | 19.67 | 0 |   |
| 14796  | M | 10.13 | 1 | 2 |
| 9569   | F | 18.74 | 1 | 2 |
| 12513  | F | 14.01 | 0 |   |
| 6531   | F | 22.89 | 1 | 2 |
| 2X0331 | F | 23.83 | 0 |   |
| 8623   | M | 20.07 | 1 | 2 |
| 1X4739 | F | 23.70 | 1 | 2 |
| 17031  | M | 7.55  | 0 |   |
| 1X3834 | M | 28.16 | 1 | 1 |
| 6334   | M | 23.29 | 1 | 2 |
| 9427   | M | 18.82 | 1 | 2 |
| 14665  | F | 10.50 | 1 | 1 |
| 8895   | F | 19.70 | 1 | 2 |
| 15639  | M | 9.07  | 1 | 2 |
| 6948   | F | 20.64 | 1 | 2 |
| 1X3849 | F | 27.99 | 1 | 2 |
| 6714   | F | 22.48 | 0 |   |
| 1X3870 | F | 27.90 | 0 |   |
| 8344   | M | 20.72 | 1 | 1 |
| 9282   | M | 19.28 | 1 | 1 |
| 18391  | F | 6.93  | 1 | 2 |

|        |   |       |   |   |
|--------|---|-------|---|---|
| 15579  | M | 9.66  | 1 | 2 |
| 17355  | M | 8.06  | 1 | 2 |
| 18341  | M | 6.79  | 0 |   |
| 15140  | M | 10.33 | 1 | 2 |
| 8827   | F | 20.23 | 1 | 2 |
| 8170   | M | 20.85 | 1 | 2 |
| 7229   | M | 22.18 | 1 | 2 |
| 15464  | F | 9.73  | 1 | 2 |
| 11639  | F | 18.90 | 1 | 1 |
| 10183  | F | 17.99 | 0 |   |
| 14909  | F | 10.64 | 1 | 2 |
| 10429  | F | 17.59 | 1 | 1 |
| 8893   | F | 20.05 | 1 | 1 |
| 6995   | F | 22.49 | 1 | 2 |
| 7137   | F | 22.54 | 1 | 2 |
| 1X3649 | F | 29.48 | 1 | 2 |
| 8980   | F | 19.93 | 1 | 1 |
| 8518   | M | 20.61 |   |   |
| 16368  | M | 9.05  | 1 | 2 |
| 14167  | F | 11.59 | 0 |   |
| 14499  | F | 11.65 | 1 | 1 |
| 18971  | M | 6.70  |   |   |
| 15885  | F | 9.87  | 1 | 2 |
| 14931  | F | 11.10 | 1 | 2 |
| 11600  | F | 15.95 | 1 | 1 |
| 9903   | M | 19.18 | 1 | 2 |
| 9361   | F | 19.62 | 1 | 1 |
| 1X4194 | F | 27.58 | 1 | 2 |
| 8822   | F | 20.75 | 1 | 2 |
| 6717   | F | 23.76 | 1 | 2 |
| 6321   | M | 24.28 | 1 | 2 |
| 16115  | F | 9.70  | 1 | 1 |
| 1X4032 | F | 28.39 | 1 | 1 |
| 9714   | F | 19.60 | 1 | 2 |
| 6315   | F | 24.48 | 1 | 2 |
| 7735   | M | 22.21 | 1 | 2 |
| 9174   | F | 20.35 | 1 | 2 |
| 8574   | F | 21.18 | 1 | 2 |
| 8274   | F | 21.59 | 0 |   |
| 9495   | F | 19.99 | 1 | 2 |
| 10128  | F | 29.15 | 1 | 2 |
| 14883  | F | 11.39 | 1 | 1 |
| 14859  | F | 11.50 | 1 | 2 |
| 9586   | F | 19.89 | 1 | 2 |
| 7606   | F | 22.40 | 1 | 2 |
| 9128   | F | 20.44 | 1 | 2 |
| 13280  | M | 13.33 |   |   |
| 10208  | F | 18.42 | 1 | 2 |
| 17230  | F | 8.50  | 0 |   |

|        |   |       |   |   |
|--------|---|-------|---|---|
| 7784   | F | 22.13 | 1 | 2 |
| 9285   | M | 19.89 | 1 | 2 |
| 9417   | F | 20.07 | 1 | 2 |
| 6800   | F | 23.76 | 1 | 2 |
| 7644   | F | 22.42 | 1 | 2 |
| 8322   | F | 21.52 | 1 | 2 |
| 7720   | F | 22.31 | 1 | 2 |
| 8307   | F | 21.59 | 1 | 1 |
| 15423  | F | 10.77 | 1 | 2 |
| 6955   | M | 23.82 | 1 | 2 |
| 8512   | F | 21.42 | 1 | 2 |
| 2X0252 | F | 27.45 | 0 |   |
| 1X4850 | F | 24.97 | 1 | 2 |
| 9592   | F | 20.14 | 0 |   |
| 6903   | F | 23.60 | 1 | 2 |
| 1X4074 | F | 28.55 | 1 | 1 |
| 1X3830 | F | 29.49 | 1 | 1 |
| 8134   | F | 22.01 | 1 | 2 |
| 6753   | F | 23.96 | 0 |   |
| 14676  | M | 12.06 | 1 | 1 |
| 8860   | M | 20.49 | 1 | 2 |
| 9129   | F | 20.43 | 1 | 1 |
| 8826   | F | 20.84 | 1 | 2 |
| 6838   | F | 24.09 | 1 | 2 |
| 8510   | F | 21.42 | 1 | 2 |
| 7335   | F | 22.93 | 1 | 1 |
| 7862   | F | 22.07 | 1 | 2 |
| 8246   | F | 21.64 | 1 | 2 |
| 1X4272 | F | 27.41 | 1 | 1 |
| 17966  | F | 7.98  | 1 | 2 |
| 15858  | F | 10.14 |   |   |
| 7368   | F | 22.89 |   |   |
| 1X4558 | F | 26.14 | 1 | 2 |
| 9632   | F | 19.79 | 1 | 2 |
| 18729  | M | 7.19  | 1 | 1 |
| 7663   | M | 22.31 | 1 | 2 |
| 8698   | M | 20.10 | 1 | 2 |
| 9646   | F | 19.77 | 1 | 1 |
| 8288   | M | 21.56 | 1 | 2 |
| 7872   | F | 22.07 | 1 | 2 |
| 14955  | F | 11.20 | 1 | 1 |
| 8905   | F | 20.75 | 1 | 1 |
| 1X4009 | F | 28.29 | 1 | 2 |
| 8937   | M | 20.75 | 1 | 2 |
| 6528   | F | 23.95 | 1 | 2 |
| 8667   | F | 21.05 | 1 | 2 |
| 7844   | M | 22.19 |   |   |
| 7394   | F | 22.71 | 1 | 2 |
| 6312   | M | 24.30 | 1 | 2 |



|        |   |       |   |   |
|--------|---|-------|---|---|
| 6600   | F | 23.87 | 1 | 2 |
| 8627   | F | 1.17  | 1 | 2 |
| 15973  | M | 9.92  | 0 |   |
| 7223   | M | 22.56 | 1 | 2 |
| 14387  | M | 11.39 |   |   |
| 15938  | F | 9.98  | 1 | 1 |
| 6734   | F | 23.70 | 1 | 1 |
| 10157  | F | 18.64 | 0 |   |
| 8092   | F | 21.67 | 1 | 2 |
| 12499  | F | 14.08 | 1 | 2 |
| 7538   | F | 21.61 | 1 | 2 |
| 14894  | F | 11.14 | 1 | 2 |
| 6280   | F | 23.77 | 1 | 1 |
| 9261   | M | 19.24 | 1 | 2 |
| 12720  | F | 13.25 | 1 | 2 |
| 16073  | M | 8.95  | 1 | 2 |
| 6937   | F | 22.19 |   |   |
| 8786   | F | 19.60 | 1 | 2 |
| 1X4609 | F | 24.87 | 1 | 2 |
| 14166  | M | 11.46 | 1 | 1 |
| 18795  | M | 6.32  | 1 | 2 |
| 12457  | F | 14.27 | 1 | 2 |
| 16102  | F | 9.47  | 0 |   |
| 8212   | M | 20.77 | 1 | 2 |
| UN009  | F |       | 1 | 2 |
| 14879  | F | 10.07 | 1 | 2 |
| 8088   | F | 20.73 | 1 | 2 |
| 16231  | F | 8.64  | 0 |   |
| 17810  | F | 13.13 |   |   |
| 10044  | F | 17.95 | 1 | 2 |
| 11886  | F | 14.52 | 1 | 1 |
| 8601   | M | 19.99 | 1 | 2 |
| 18747  | F | 6.08  | 0 |   |
| 7196   | F | 21.54 | 0 |   |
| 10054  | M | 18.10 | 0 |   |
| 9362   | F | 20.50 | 1 | 2 |
| 9514   | F | 20.35 | 1 | 1 |
| 8091   | M | 22.35 | 0 |   |
| 9178   | F | 20.83 | 1 | 2 |
| 7017   | F | 24.44 | 1 | 1 |
| 10039  | F | 20.12 | 1 | 1 |
| 10164  | F | 19.91 | 0 |   |
| 18531  | M | 7.82  | 0 |   |
| 10042  | F | 19.88 | 1 | 2 |
| 10082  | F | 20.06 | 1 | 2 |
| 7675   | F | 22.86 | 1 | 1 |
| 11163  | F | 17.88 | 1 | 2 |
| 10535  | F | 20.07 | 1 | 2 |
| 9040   | F | 21.04 |   |   |

|       |   |       |   |   |
|-------|---|-------|---|---|
| 14923 | F | 12.32 | 0 |   |
| 10130 | F | 19.76 | 0 |   |
| 9694  | F | 20.33 | 1 | 2 |
| 8538  | F | 21.64 | 1 | 2 |
| 6956  | F | 24.05 | 1 | 2 |
| 13947 | M | 13.64 | 1 | 2 |
| 11627 | F | 16.89 |   |   |
| 9743  | F | 20.34 | 1 | 2 |
| 10259 | F | 19.56 | 1 | 2 |
| 10173 | M | 19.67 | 0 |   |
| 10280 | F | 19.54 | 1 | 2 |
| 18737 | F | 12.24 | 1 | 2 |
| 9385  | F | 20.75 | 1 | 1 |
| 14478 | F | 12.34 | 1 | 2 |
| 8183  | F | 22.39 | 1 | 2 |
| 10297 | F | 19.47 | 1 | 1 |
| 9124  | M | 20.98 |   |   |
| 10161 | M | 19.79 | 0 |   |
| 10417 | M | 19.14 |   |   |
| 7764  | F | 22.74 | 0 |   |
| 6793  | F | 24.57 | 1 | 2 |
| 8926  | F | 21.25 | 1 | 2 |
| 9635  | F | 20.34 | 1 | 2 |
| 9675  | F | 20.20 |   |   |
| 14381 | F | 12.47 | 1 | 2 |
| 10393 | F | 19.26 | 1 | 2 |
| 15588 | M | 11.25 |   |   |
| 7366  | F | 23.35 | 0 |   |
| 10041 | M | 19.98 |   |   |
| 10734 | F | 18.68 | 0 |   |
| 10619 | F | 19.07 | 1 | 1 |
| 8499  | F | 21.96 |   |   |
| 15674 | M | 10.75 |   |   |
| 9666  | F | 20.22 | 1 | 2 |
| 17111 | F | 9.24  | 1 | 2 |
| 10127 | F | 19.97 | 1 | 1 |
| 10988 | F | 18.35 | 1 | 2 |
| 10841 | F | 18.39 | 1 | 1 |
| 11997 | F | 16.63 | 1 | 2 |
| 10492 | F | 19.20 | 1 | 1 |
| 14277 | M | 13.21 |   |   |
| 10741 | F | 18.65 | 1 | 1 |
| 10160 | F | 19.88 | 1 | 2 |
| 9467  | F | 20.54 | 1 | 2 |
| 15843 | F | 11.25 | 1 | 2 |
| 11009 | F | 18.22 | 1 | 2 |
| 10120 | F | 19.62 | 0 |   |
| 10728 | F | 18.68 |   |   |
| 10206 | F | 20.02 | 1 | 2 |

|        |   |       |   |   |
|--------|---|-------|---|---|
| 10806  | F | 18.51 |   |   |
| 13645  | M | 14.12 | 1 | 2 |
| 13625  | F | 14.23 | 1 | 2 |
| 11687  | F | 17.18 | 1 | 2 |
| 9855   | F | 20.60 | 1 | 2 |
| 10912  | F | 18.40 | 1 | 2 |
| 10347  | F | 19.36 | 0 |   |
| 10504  | F | 18.99 | 1 | 2 |
| 14324  | F | 13.19 |   |   |
| 11619  | F | 17.13 | 1 | 2 |
| 18742  | F | 19.14 | 1 | 2 |
| 14039  | M | 13.55 |   |   |
| 9860   | M | 20.43 |   |   |
| 10872  | F | 17.22 | 1 | 2 |
| 16852  | F | 8.99  | 1 | 1 |
| 9205   | F | 19.97 | 0 |   |
| 7808   | F | 22.28 | 1 | 1 |
| 6812   | F | 23.64 | 1 | 2 |
| 9014   | F | 20.59 | 1 | 1 |
| 6740   | F | 23.72 | 0 |   |
| 7716   | F | 22.31 | 1 | 2 |
| 7701   | F | 22.29 | 1 | 2 |
| 9711   | F | 19.65 | 1 | 2 |
| 9808   | F | 19.48 | 0 |   |
| 8116   | F | 21.87 | 1 | 1 |
| 6971   | F | 23.58 | 1 | 2 |
| 8477   | M | 21.32 |   |   |
| 8024   | M | 22.32 | 0 |   |
| 12417  | F | 15.21 | 1 | 2 |
| 7091   | M | 23.40 |   |   |
| 1X4218 | F | 28.02 |   |   |
| 1X4243 | F | 27.80 | 0 |   |
| 6622   | F | 24.13 | 1 | 2 |
| 9841   | F | 19.59 | 1 | 2 |
| 7398   | F | 23.03 | 1 | 2 |
| 11672  | M | 15.61 |   |   |
| 13226  | F | 13.87 | 1 | 2 |
| 13546  | M | 13.44 |   |   |
| 8206   | F | 22.10 | 1 | 1 |
| 2X0253 | F | 27.45 | 1 | 2 |
| 6335   | F | 24.53 | 1 | 2 |
| 8817   | F | 21.29 | 1 | 2 |
| 7122   | F | 23.58 | 1 | 1 |
| 10052  | F | 19.48 | 1 | 2 |
| 7311   | F | 23.31 | 1 | 2 |
| 9203   | F | 20.64 | 1 | 2 |

Table S2. Raw phenotypic measurements for metric traits, including replicates (1 and 2) for measurements taken on left (L) and right (R) hemispheres.

| ID | Side | arsp1  | arsp2  | cs1    | cs2    | iar1   | iar2   | ips1   | ips2   | lf1    | lf2    | lu1    | lu2    | ps1    | ps2    | sar1   | sar2   | spcd1  | spcd2  | sts1   | sts2   |
|----|------|--------|--------|--------|--------|--------|--------|--------|--------|--------|--------|--------|--------|--------|--------|--------|--------|--------|--------|--------|--------|
| 1  | L    | 9.544  | 9.360  | 50.999 | 54.779 | 32.313 | 33.148 | 49.235 | 45.121 | 62.764 | 63.691 | 41.758 | 38.448 | 31.627 | 31.621 | 13.321 | 12.970 | 19.886 | 19.437 | 62.362 | 61.247 |
| 1  | R    | 9.459  | 9.164  | NA     | NA     | 35.680 | 35.274 | NA     | NA     | 57.049 | 59.433 | 47.551 | 42.598 | 34.895 | 35.574 | 17.483 | 16.871 | 11.833 | 11.184 | 61.390 | 62.545 |
| 2  | L    | 11.810 | 11.595 | NA     | NA     | 27.149 | 28.056 | 37.938 | 37.992 | 50.738 | 51.730 | 37.424 | 38.698 | 29.824 | 30.085 | NA     | NA     | 20.440 | 19.987 | 62.493 | 63.928 |
| 2  | R    | 8.747  | 9.464  | 46.630 | 44.078 | 24.305 | 24.236 | 36.978 | 39.727 | 50.184 | 53.125 | 38.642 | 42.014 | 30.572 | 30.406 | 11.047 | 11.196 | NA     | NA     | 54.646 | 55.694 |
| 4  | L    | 12.213 | 12.533 | NA     | NA     | 28.912 | 30.141 | 39.179 | 39.390 | 51.607 | 52.377 | 39.594 | 44.489 | 29.105 | 30.370 | 16.702 | 16.608 | 25.639 | 26.649 | 60.964 | 58.939 |
| 4  | R    | 8.539  | 10.779 | 47.872 | 47.260 | 27.158 | 28.217 | 37.066 | 40.395 | 48.394 | 50.390 | 39.942 | 41.044 | NA     | NA     | NA     | NA     | NA     | NA     | 55.913 | 56.318 |
| 5  | L    | 6.057  | 6.031  | 46.106 | 46.052 | 27.816 | 27.653 | 37.926 | 40.690 | 48.454 | 47.262 | 33.872 | 33.239 | 29.660 | 29.013 | 8.444  | 8.883  | 26.360 | 26.251 | 69.359 | 71.141 |
| 5  | R    | 6.762  | 6.896  | 48.136 | 47.555 | 26.378 | 26.383 | 40.782 | 42.644 | 47.114 | 49.286 | NA     | NA     | 31.091 | 28.931 | NA     | NA     | NA     | NA     | NA     | NA     |
| 6  | L    | 9.296  | 8.735  | 48.859 | 48.922 | 27.287 | 27.071 | NA     | NA     | 62.569 | 62.767 | NA     | NA     | 31.339 | 29.989 | 9.360  | 10.831 | 24.925 | 24.454 | 58.825 | 57.971 |
| 6  | R    | 7.822  | 8.344  | NA     | NA     | 27.486 | 26.740 | 38.642 | 38.327 | NA     | NA     | 37.923 | 38.098 | NA     | NA     | 11.728 | 11.185 | NA     | NA     | 52.918 | 52.072 |
| 7  | L    | 7.966  | 6.862  | 46.903 | 46.279 | 30.330 | 32.143 | 37.931 | 38.114 | 47.884 | 49.165 | 43.579 | 42.499 | 31.476 | 32.388 | 12.250 | 13.234 | 20.067 | 21.306 | 64.953 | 65.233 |
| 7  | R    | 6.211  | 5.519  | 48.472 | 50.843 | 32.963 | 30.873 | 38.498 | 40.006 | 47.392 | 47.785 | 41.862 | 42.311 | NA     | NA     | 14.277 | 14.163 | 21.588 | 22.621 | NA     | NA     |
| 8  | L    | 6.997  | 6.985  | 45.063 | 45.509 | 34.255 | 35.128 | NA     | NA     | 56.426 | 58.130 | NA     | NA     | NA     | NA     | 11.098 | 10.255 | NA     | NA     | 60.853 | 61.595 |
| 8  | R    | 3.017  | 2.474  | 45.690 | 49.889 | 30.227 | 30.449 | 35.972 | 38.906 | NA     | NA     | 41.711 | 37.592 | 31.787 | 32.624 | 12.481 | 13.116 | 21.735 | 21.382 | NA     | NA     |
| 9  | L    | 7.801  | 9.470  | NA     | NA     | 31.207 | 31.103 | NA     | NA     | 50.121 | 51.109 | 36.133 | 38.062 | NA     | NA     | 12.800 | 13.537 | 17.426 | 16.780 | NA     | NA     |
| 9  | R    | 7.050  | 8.036  | 57.154 | 54.633 | 29.428 | 29.365 | 37.784 | 42.011 | NA     | NA     | 39.445 | 39.501 | 27.050 | 26.902 | NA     | NA     | 24.983 | 25.155 | 61.111 | 61.681 |
| 10 | R    | 6.696  | 6.852  | 51.258 | 51.081 | 33.081 | 31.059 | 37.018 | 40.344 | 52.253 | 55.274 | 41.772 | 41.381 | 33.875 | 33.602 | 13.675 | 13.155 | 20.554 | 21.977 | 60.329 | 63.084 |
| 12 | R    | 8.124  | 7.601  | 51.137 | 49.915 | NA     | NA     | 39.436 | 38.688 | 49.205 | 48.330 | 41.365 | 43.219 | 31.734 | 29.846 | 12.868 | 12.560 | 18.608 | 18.608 | 57.809 | 58.332 |
| 13 | L    | 10.067 | 10.375 | 50.215 | 48.722 | 28.088 | 28.263 | 40.925 | 39.567 | 51.970 | 51.295 | NA     | NA     | 29.953 | 30.249 | 12.141 | 11.799 | NA     | NA     | 63.217 | 63.498 |
| 13 | R    | 8.378  | 8.932  | 50.492 | 50.138 | 31.136 | 30.603 | 39.277 | 38.728 | NA     | NA     | 40.880 | 41.252 | 29.733 | 30.044 | 13.742 | 14.408 | 22.433 | 22.717 | 65.397 | 64.442 |
| 14 | L    | 8.168  | 7.734  | 48.747 | 49.594 | 30.614 | 28.967 | 45.345 | 44.019 | NA     | NA     | 34.188 | 35.267 | NA     | NA     | 12.763 | 14.261 | 24.235 | 23.747 | 68.471 | 67.622 |
| 14 | R    | 10.652 | 9.941  | NA     | NA     | 30.225 | 29.061 | 40.429 | 40.527 | 47.836 | 51.203 | 33.089 | 35.702 | 30.453 | 31.048 | 15.482 | 17.065 | 23.310 | 23.514 | 70.062 | 68.258 |
| 15 | L    | 10.952 | 12.074 | 44.252 | 47.751 | 33.166 | 32.927 | 34.423 | 34.648 | 53.302 | 55.923 | 41.415 | 39.515 | NA     | NA     | 17.630 | 16.153 | 22.888 | 24.428 | 57.804 | 62.785 |
| 15 | R    | 7.881  | 7.112  | 46.026 | 44.945 | 32.886 | 33.919 | 32.986 | 34.610 | 55.919 | 55.625 | 40.923 | 42.131 | 27.399 | 26.270 | 11.663 | 11.251 | 15.343 | 15.930 | NA     | NA     |
| 16 | L    | 8.189  | 7.700  | 46.976 | 48.983 | NA     | NA     | NA     | NA     | 52.665 | 52.404 | 38.827 | 42.045 | 25.807 | 26.021 | 11.854 | 12.390 | 19.548 | 19.319 | 58.618 | 57.137 |
| 17 | L    | 7.594  | 7.978  | NA     | NA     | 27.691 | 28.668 | 43.896 | 43.963 | 55.309 | 54.158 | NA     | NA     | 27.919 | 27.152 | 15.777 | 13.416 | 19.110 | 17.815 | 59.751 | 60.660 |

|    |   |        |        |        |        |        |        |        |        |        |        |        |        |        |        |        |        |        |        |        |        |
|----|---|--------|--------|--------|--------|--------|--------|--------|--------|--------|--------|--------|--------|--------|--------|--------|--------|--------|--------|--------|--------|
| 18 | R | 3.961  | 5.318  | 51.342 | 52.295 | 25.064 | 27.749 | 38.157 | 37.539 | 48.659 | 48.535 | 43.839 | 43.950 | NA     | NA     | NA     | NA     | 22.464 | 24.212 | NA     | NA     |
| 19 | L | 5.466  | 5.917  | 52.115 | 53.144 | 33.166 | 33.947 | 43.752 | 43.006 | 54.450 | 53.221 | 41.072 | 41.842 | 29.126 | 28.411 | 18.219 | 17.501 | 20.339 | 22.801 | 61.627 | 59.898 |
| 19 | R | 2.549  | 3.010  | 47.490 | 48.494 | 31.104 | 29.344 | 42.681 | 44.129 | 49.201 | 47.181 | 42.922 | 43.568 | NA     | NA     | 12.458 | 11.480 | NA     | NA     | 56.822 | 56.765 |
| 20 | L | 4.374  | 5.414  | 45.808 | 47.084 | 26.679 | 28.698 | 38.068 | 40.694 | 49.769 | 50.708 | 38.113 | 39.358 | 27.490 | 28.467 | 15.692 | 16.524 | 17.336 | 17.806 | NA     | NA     |
| 20 | R | 3.440  | 3.340  | 45.250 | 48.401 | 33.082 | 31.113 | NA     | 14.304 | 14.792 | 16.266 | 19.359 | 59.045 | 59.401 |
| 21 | L | 5.825  | 5.372  | 54.226 | 53.559 | 31.063 | 30.012 | 42.237 | 40.732 | NA     | NA     | 35.843 | 36.081 | 29.129 | 29.701 | 13.628 | 12.402 | 20.922 | 22.661 | 65.612 | 65.617 |
| 22 | R | 11.710 | 10.713 | 49.415 | 49.619 | 26.221 | 26.901 | 41.414 | 40.223 | 48.981 | 46.850 | NA     | NA     | 25.858 | 23.776 | 9.980  | 10.912 | 17.054 | 17.610 | 64.042 | 65.101 |
| 23 | L | 9.364  | 8.681  | 46.101 | 45.242 | 28.449 | 29.202 | NA     | 10.838 | 10.877 | 14.620 | 12.853 | 55.781 | 60.181 |
| 23 | R | 8.394  | 6.223  | 48.000 | 51.152 | 28.323 | 27.133 | 46.109 | 46.147 | 49.823 | 48.849 | 36.910 | 36.500 | 30.539 | 32.014 | 15.968 | 15.832 | 15.999 | 13.941 | 55.789 | 56.024 |
| 24 | L | 7.496  | 8.817  | 47.541 | 48.319 | 23.919 | 23.994 | 37.478 | 35.436 | 51.654 | 50.885 | 42.093 | 41.634 | NA     | NA     | NA     | NA     | 23.731 | 23.881 | NA     | NA     |
| 24 | R | 8.307  | 9.375  | 49.381 | 50.867 | 25.588 | 25.987 | NA     | NA     | NA     | NA     | NA     | NA     | 29.467 | 29.258 | 12.671 | 12.644 | 21.783 | 22.004 | 53.601 | 54.724 |
| 25 | L | 1.318  | 1.439  | 42.843 | 42.822 | 30.551 | 30.463 | 46.298 | 43.869 | 55.573 | 55.292 | 41.021 | 42.510 | 34.630 | 34.896 | 13.331 | 12.779 | NA     | NA     | 59.751 | 58.642 |
| 26 | L | 1.190  | 1.915  | 49.433 | 46.855 | 33.844 | 33.467 | 42.579 | 39.664 | 52.613 | 53.121 | 35.200 | 34.866 | 30.185 | 30.311 | 9.353  | 10.240 | NA     | NA     | NA     | NA     |
| 26 | R | 8.673  | 7.489  | 48.744 | 47.495 | 31.639 | 30.056 | NA     | NA     | 49.525 | 48.089 | NA     | NA     | 28.938 | 28.446 | 11.419 | 11.569 | 24.738 | 24.406 | 63.807 | 62.505 |
| 27 | L | 9.534  | 9.688  | NA     | NA     | 29.354 | 32.794 | 41.693 | 42.857 | NA     | NA     | 34.602 | 34.487 | NA     | NA     | 16.237 | 16.821 | 22.423 | 21.964 | 69.279 | 68.097 |
| 27 | R | 1.655  | 1.747  | 47.387 | 47.152 | 25.258 | 24.060 | 40.776 | 38.384 | 47.602 | 49.041 | NA     | NA     | 27.712 | 27.226 | 13.763 | 15.458 | 20.459 | 22.362 | NA     | NA     |
| 28 | L | 8.737  | 9.526  | 46.280 | 44.816 | 30.517 | 30.303 | 37.396 | 36.932 | 49.970 | 50.083 | NA     | NA     | 33.495 | 34.387 | 10.090 | 10.631 | 26.250 | 24.929 | 67.030 | 65.489 |
| 28 | R | 10.407 | 9.923  | 47.255 | 45.739 | 32.215 | 30.286 | 39.337 | 38.758 | 51.449 | 52.188 | 36.623 | 37.450 | 32.287 | 31.333 | NA     | NA     | 21.214 | 21.884 | 63.092 | 62.865 |
| 29 | L | 6.705  | 8.022  | NA     | NA     | 29.752 | 30.387 | 37.766 | 38.096 | NA     | NA     | 39.714 | 39.736 | NA     | NA     | 11.592 | 11.907 | 18.293 | 21.076 | 60.156 | 59.386 |
| 29 | R | 6.131  | 7.625  | 48.314 | 48.100 | 30.174 | 29.362 | NA     | NA     | 52.891 | 51.335 | NA     | NA     | 27.837 | 27.328 | 17.228 | 17.582 | 22.046 | 25.084 | NA     | NA     |
| 30 | L | 11.203 | 11.650 | NA     | NA     | 29.444 | 29.780 | 41.767 | 41.397 | 58.864 | 58.929 | 38.888 | 37.181 | 30.827 | 31.694 | NA     | NA     | 23.298 | 21.477 | 71.519 | 71.959 |
| 32 | L | 7.285  | 5.314  | 47.091 | 49.024 | 34.354 | 35.369 | NA     | NA     | 50.846 | 50.673 | 39.302 | 39.009 | 29.784 | 30.522 | 13.721 | 12.710 | 22.617 | 24.245 | 67.010 | 65.805 |
| 32 | R | 10.711 | 11.045 | NA     | NA     | 29.062 | 29.951 | 37.820 | 38.122 | NA     | NA     | 41.830 | 41.780 | 30.192 | 32.755 | NA     | NA     | 22.089 | 22.346 | 59.816 | 58.373 |
| 33 | L | 10.228 | 9.314  | 44.839 | 44.841 | 31.180 | 31.206 | 39.525 | 40.104 | 56.437 | 56.261 | 36.844 | 37.589 | 30.543 | 30.765 | 10.250 | 10.454 | 16.445 | 15.990 | 65.029 | 62.656 |
| 33 | R | 9.573  | 11.374 | 45.008 | 45.455 | 30.408 | 30.372 | NA     | NA     | 50.719 | 51.365 | NA     | NA     | 34.284 | 33.271 | NA     | NA     | NA     | NA     | 61.607 | 62.657 |
| 34 | L | 11.231 | 11.301 | 52.447 | 52.348 | 26.345 | 27.867 | 38.887 | 39.041 | 51.330 | 51.186 | NA     | NA     | 29.193 | 28.464 | 16.063 | 16.404 | 25.900 | 25.686 | 64.083 | 65.009 |
| 34 | R | 7.029  | 9.201  | 50.695 | 50.992 | 27.516 | 25.681 | NA     | NA     | NA     | NA     | 37.228 | 36.112 | 32.100 | 30.949 | 15.661 | 15.440 | 25.811 | 26.827 | NA     | NA     |
| 35 | L | 8.783  | 9.858  | 48.274 | 48.314 | 29.371 | 29.733 | NA     | NA     | 57.888 | 58.033 | 38.346 | 37.159 | NA     | NA     | 14.078 | 13.993 | 14.851 | 15.584 | 67.746 | 69.271 |
| 36 | L | 7.848  | 8.296  | 46.731 | 48.063 | 29.804 | 28.184 | 39.604 | 38.256 | 59.038 | 57.806 | 36.765 | 34.526 | 27.647 | 28.655 | 15.865 | 16.784 | 18.256 | 17.247 | 60.543 | 62.591 |
| 36 | R | 8.706  | 8.547  | 50.019 | 49.642 | 29.331 | 29.613 | 35.075 | 35.644 | 53.195 | 56.035 | NA     | NA     | 28.562 | 29.534 | 15.286 | 15.797 | 15.416 | 17.831 | NA     | NA     |
| 38 | L | 5.525  | 5.262  | 45.926 | 45.130 | 26.184 | 27.682 | 35.484 | 32.862 | NA     | NA     | 35.720 | 33.589 | 29.140 | 27.530 | NA     | NA     | 23.578 | 22.970 | 64.807 | 63.938 |

|    |   |        |        |        |        |        |        |        |        |        |        |        |        |        |        |        |        |        |        |        |        |
|----|---|--------|--------|--------|--------|--------|--------|--------|--------|--------|--------|--------|--------|--------|--------|--------|--------|--------|--------|--------|--------|
| 40 | L | 8.605  | 7.812  | 47.274 | 46.983 | 32.888 | 33.740 | 42.044 | 42.626 | 56.059 | 59.061 | 37.602 | 39.693 | 29.537 | 30.420 | 14.628 | 15.640 | 11.802 | 11.123 | 62.541 | 61.879 |
| 40 | R | 7.466  | 7.979  | 48.415 | 47.036 | 29.078 | 29.397 | 41.710 | 42.573 | NA     | NA     | 42.183 | 41.573 | 29.235 | 31.031 | NA     | NA     | NA     | NA     | NA     | NA     |
| 41 | R | 9.593  | 10.226 | 48.592 | 47.077 | 28.360 | 28.113 | 40.299 | 38.352 | NA     | NA     | 33.080 | 33.921 | 28.755 | 29.110 | 15.651 | 15.775 | 19.422 | 19.989 | 58.279 | 58.977 |
| 42 | L | 7.646  | 8.511  | 48.731 | 47.872 | 28.998 | 32.461 | 40.402 | 37.033 | 53.105 | 55.742 | 31.833 | 32.088 | 31.371 | 31.078 | NA     | NA     | NA     | NA     | 53.800 | 54.885 |
| 42 | R | 10.864 | 11.359 | 43.012 | 44.976 | 30.084 | 29.815 | 37.321 | 38.836 | 51.677 | 52.143 | 34.528 | 35.556 | NA     | NA     | 13.103 | 13.854 | 20.184 | 19.969 | 57.670 | 57.496 |
| 43 | L | 2.450  | 1.530  | 50.330 | 49.076 | 28.712 | 26.885 | NA     | NA     | 55.370 | 51.263 | NA     | NA     | 29.897 | 29.579 | 10.967 | 10.743 | 17.268 | 18.659 | 59.737 | 58.890 |
| 43 | R | 4.402  | 2.951  | 52.986 | 55.347 | 28.014 | 26.511 | 38.407 | 38.140 | NA     | NA     | 39.767 | 39.180 | NA     | NA     | 16.838 | 16.741 | 21.496 | 20.577 | 59.515 | 62.078 |
| 46 | L | 8.543  | 7.468  | NA     | NA     | 29.313 | 28.444 | 43.447 | 39.663 | 53.302 | 51.396 | 33.971 | 37.981 | 29.079 | 29.618 | 8.443  | 8.476  | 19.518 | 19.732 | 66.411 | 66.092 |
| 46 | R | 3.574  | 3.571  | 44.430 | 45.000 | 27.072 | 24.058 | 39.426 | 36.757 | NA     | NA     | 43.217 | 41.071 | 25.479 | 25.230 | 11.524 | 12.774 | 18.828 | 20.512 | 64.354 | 69.204 |
| 47 | R | 2.475  | 1.927  | 49.207 | 48.442 | NA     | NA     | 42.452 | 44.869 | 53.711 | 52.192 | 37.440 | 39.591 | NA     |
| 48 | L | 4.174  | 3.408  | NA     | NA     | 30.883 | 31.111 | 42.567 | 42.829 | 45.946 | 44.556 | 34.965 | 34.591 | NA     | NA     | 11.468 | 11.442 | 20.391 | 18.986 | 63.553 | 66.383 |
| 50 | R | 7.482  | 7.729  | 45.016 | 46.403 | NA     | NA     | NA     | NA     | 48.482 | 48.042 | 37.003 | 36.286 | NA     | NA     | 8.433  | 8.618  | 19.009 | 18.814 | 62.267 | 61.942 |
| 51 | L | 8.189  | 8.961  | 41.791 | 42.162 | 31.309 | 31.630 | 36.750 | 37.060 | 57.854 | 60.212 | 33.557 | 34.408 | NA     | NA     | 14.661 | 15.448 | 6.417  | 7.379  | 57.388 | 57.712 |
| 51 | R | 10.715 | 10.635 | 40.308 | 41.883 | 34.217 | 33.117 | 39.556 | 40.541 | NA     | NA     | NA     | NA     | 26.109 | 25.152 | 13.633 | 13.057 | 20.617 | 19.414 | 57.551 | 55.240 |
| 52 | R | 12.515 | 13.480 | 44.898 | 46.091 | 31.291 | 32.084 | NA     | NA     | 51.551 | 52.828 | 44.396 | 46.032 | 33.224 | 32.686 | 16.572 | 17.108 | NA     | NA     | NA     | NA     |
| 53 | R | 4.247  | 3.566  | 47.330 | 48.390 | 26.655 | 27.878 | 43.133 | 42.597 | NA     | NA     | 37.889 | 37.369 | 30.303 | 30.419 | 13.092 | 12.918 | 17.958 | 18.367 | 60.268 | 60.407 |
| 54 | L | 8.881  | 8.802  | 47.758 | 44.685 | 27.102 | 26.283 | 45.547 | 46.036 | 52.667 | 54.581 | 36.755 | 36.866 | 32.882 | 32.865 | 16.551 | 18.113 | 26.908 | 27.519 | 60.826 | 59.103 |
| 54 | R | 11.190 | 10.461 | 46.672 | 45.613 | 20.206 | 21.022 | 43.807 | 41.954 | 48.399 | 48.196 | 40.429 | 42.263 | 31.893 | 33.053 | 12.899 | 13.310 | NA     | NA     | NA     | NA     |
| 55 | L | 9.559  | 8.967  | 46.711 | 45.685 | 28.614 | 25.335 | 44.610 | 43.937 | 49.945 | 50.816 | 39.125 | 40.252 | NA     | NA     | 13.824 | 13.987 | 21.016 | 18.277 | 65.731 | 66.468 |
| 55 | R | 8.328  | 7.590  | 45.529 | 44.827 | 22.285 | 23.305 | NA     | NA     | 48.481 | 51.801 | NA     | NA     | 30.569 | 30.330 | 17.150 | 16.988 | 20.007 | 20.896 | NA     | NA     |
| 56 | L | 7.448  | 5.254  | 40.419 | 39.974 | 29.863 | 31.140 | 36.333 | 35.342 | NA     | NA     | 32.532 | 33.757 | 28.213 | 26.348 | 13.831 | 14.273 | 13.374 | 13.359 | 66.738 | 63.674 |
| 56 | R | 4.079  | 5.779  | 39.029 | 39.605 | 29.729 | 31.724 | 35.693 | 34.822 | 54.787 | 53.007 | 36.748 | 37.681 | 25.886 | 25.870 | NA     | NA     | 16.653 | 16.037 | 74.780 | 75.747 |
| 58 | L | 1.688  | 1.469  | NA     | NA     | 31.775 | 30.758 | 41.917 | 39.656 | 54.740 | 54.721 | 38.081 | 37.616 | NA     | NA     | 14.827 | 14.982 | NA     | NA     | 64.742 | 62.133 |
| 58 | R | 8.173  | 7.816  | 45.549 | 46.274 | 29.354 | 28.703 | 38.073 | 41.092 | NA     | NA     | NA     | NA     | 26.458 | 26.249 | NA     | NA     | 15.485 | 14.049 | NA     | NA     |
| 59 | L | 5.092  | 5.300  | 50.145 | 48.266 | 31.927 | 30.184 | NA     | NA     | 51.213 | 47.880 | 41.866 | 42.894 | 26.657 | 27.762 | 14.656 | 14.259 | 18.383 | 19.700 | 63.231 | 59.718 |
| 59 | R | 10.320 | 9.832  | 47.333 | 45.309 | NA     | NA     | 40.390 | 40.138 | 53.390 | 53.265 | 37.614 | 36.231 | 29.009 | 28.393 | NA     | NA     | NA     | NA     | 69.905 | 68.486 |
| 60 | R | 4.728  | 3.817  | 46.751 | 46.945 | 33.564 | 34.349 | 33.181 | 33.122 | 51.557 | 52.946 | NA     | NA     | 26.662 | 26.382 | 11.657 | 12.587 | 17.752 | 15.866 | 60.166 | 59.502 |
| 61 | L | 6.824  | 6.646  | 47.578 | 44.687 | 31.115 | 31.710 | 41.859 | 43.029 | 52.100 | 53.890 | 34.755 | 33.672 | 31.342 | 31.167 | 12.598 | 13.663 | 15.849 | 16.377 | 65.516 | 65.537 |
| 61 | R | 9.737  | 10.706 | 47.105 | 46.706 | 26.725 | 27.766 | 39.842 | 40.701 | NA     | NA     | 37.716 | 36.507 | NA     | NA     | 14.333 | 13.937 | NA     | NA     | 58.614 | 57.757 |
| 62 | R | 7.249  | 7.599  | 49.651 | 48.696 | 31.142 | 31.818 | 40.993 | 41.810 | 56.748 | 56.259 | NA     | NA     | 30.465 | 31.349 | NA     | NA     | 17.605 | 18.443 | NA     | NA     |
| 63 | R | 5.958  | 5.085  | 46.334 | 47.318 | 26.973 | 29.054 | NA     | NA     | 54.298 | 53.244 | 37.010 | 34.225 | NA     | NA     | 16.573 | 14.250 | 14.970 | 16.911 | NA     | NA     |

|    |   |        |        |        |        |        |        |        |        |        |        |        |        |        |        |        |        |        |        |        |        |
|----|---|--------|--------|--------|--------|--------|--------|--------|--------|--------|--------|--------|--------|--------|--------|--------|--------|--------|--------|--------|--------|
| 65 | L | 9.291  | 9.763  | 42.230 | 42.515 | 31.010 | 31.354 | 43.304 | 43.802 | 59.506 | 56.927 | 35.879 | 37.953 | NA     | NA     | 14.195 | 13.791 | 23.827 | 22.470 | 65.447 | 67.169 |
| 65 | R | 7.469  | 7.053  | 47.298 | 48.903 | 28.655 | 30.133 | NA     | NA     | NA     | NA     | 36.467 | 35.911 | 28.154 | 28.102 | 14.146 | 14.526 | NA     | NA     | 67.969 | 65.232 |
| 66 | L | 4.951  | 5.615  | 50.890 | 50.125 | 31.478 | 29.543 | 38.281 | 39.731 | 58.279 | 55.510 | 34.477 | 32.258 | 29.404 | 29.580 | 18.053 | 18.113 | 16.569 | 14.977 | 55.780 | 55.129 |
| 66 | R | 8.687  | 9.288  | 42.270 | 44.238 | 29.834 | 29.915 | 39.399 | 38.404 | NA     | NA     | NA     | NA     | 30.718 | 28.832 | 13.293 | 13.714 | 22.737 | 21.798 | 59.632 | 59.714 |
| 67 | L | 5.440  | 6.121  | 45.573 | 42.949 | 31.956 | 34.970 | 38.290 | 37.434 | 54.469 | 53.355 | 37.510 | 38.547 | 26.717 | 26.883 | 18.860 | 19.159 | 21.995 | 23.237 | 66.000 | 65.297 |
| 67 | R | 10.434 | 10.678 | NA     | NA     | 25.569 | 26.669 | 39.192 | 40.105 | 50.738 | 49.266 | 45.121 | 45.075 | NA     | NA     | 14.960 | 15.102 | NA     | NA     | 61.631 | 65.415 |
| 70 | L | 11.191 | 13.086 | NA     | NA     | 31.363 | 28.393 | 41.613 | 38.977 | 54.488 | 53.186 | NA     | NA     | NA     | NA     | 13.556 | 15.054 | 19.863 | 18.183 | 63.435 | 65.135 |
| 71 | L | 10.937 | 10.197 | 49.099 | 49.144 | 27.786 | 27.446 | 36.048 | 39.962 | 51.881 | 51.755 | 40.507 | 42.871 | 30.543 | 30.738 | 15.699 | 15.103 | NA     | NA     | 63.447 | 63.870 |
| 71 | R | 13.407 | 15.285 | 50.704 | 49.012 | NA     | NA     | 42.895 | 38.433 | NA     | NA     | 44.270 | 45.373 | 30.426 | 30.373 | 16.504 | 15.590 | 21.802 | 23.010 | NA     | NA     |
| 73 | L | 6.915  | 5.082  | 45.818 | 44.750 | 34.957 | 38.355 | 40.189 | 36.115 | 54.233 | 55.418 | 39.358 | 38.022 | 29.305 | 30.397 | NA     | NA     | 14.203 | 15.371 | 64.932 | 65.600 |
| 73 | R | 5.665  | 8.615  | 42.294 | 42.781 | 35.882 | 35.490 | 36.224 | 35.001 | NA     | NA     | NA     | NA     | NA     | NA     | 15.218 | 15.095 | 19.778 | 20.467 | 62.646 | 62.249 |
| 74 | L | 7.780  | 8.154  | 42.710 | 42.461 | 32.615 | 32.761 | 35.781 | 37.981 | NA     | NA     | 36.524 | 37.707 | NA     | NA     | 14.462 | 15.224 | 25.966 | 23.672 | 64.420 | 63.326 |
| 74 | R | 8.323  | 8.263  | 42.987 | 40.611 | 28.446 | 30.968 | 39.741 | 37.014 | 58.436 | 56.941 | NA     | NA     | 28.444 | 29.543 | NA     | NA     | 23.423 | 22.347 | NA     | NA     |
| 76 | L | 9.980  | 8.678  | 50.058 | 49.374 | 32.302 | 35.106 | 42.328 | 41.643 | 53.543 | 53.625 | 27.982 | 27.427 | NA     | NA     | NA     | NA     | 18.989 | 20.597 | 65.013 | 65.868 |
| 76 | R | 4.877  | 4.436  | 48.311 | 49.094 | NA     | NA     | 38.379 | 39.162 | 50.373 | 50.634 | NA     | NA     | 26.073 | 26.448 | 13.530 | 12.467 | NA     | NA     | 62.174 | 61.008 |
| 78 | L | 6.024  | 8.845  | NA     | NA     | 30.525 | 27.642 | 42.579 | 43.889 | 48.439 | 50.435 | 28.090 | 28.326 | 27.438 | 27.802 | 8.582  | 9.302  | 27.282 | 25.000 | 64.474 | 66.674 |
| 79 | L | 9.087  | 8.784  | 50.727 | 50.153 | 29.595 | 29.809 | NA     | NA     | 52.340 | 54.623 | 30.234 | 29.519 | 26.018 | 26.100 | 12.724 | 12.937 | 14.865 | 16.821 | NA     | NA     |
| 79 | R | 11.362 | 11.204 | 46.723 | 45.707 | 25.473 | 25.651 | 42.128 | 41.757 | 50.433 | 48.916 | NA     | NA     | 24.771 | 26.012 | 17.245 | 17.467 | 18.876 | 19.575 | 62.635 | 61.674 |
| 80 | L | 13.133 | 11.514 | 57.443 | 57.906 | NA     | NA     | 36.456 | 40.149 | 47.244 | 48.943 | 26.221 | 26.621 | 33.453 | 33.726 | NA     | NA     | 17.471 | 19.319 | 64.908 | 62.945 |
| 80 | R | 11.909 | 10.582 | 54.307 | 54.079 | 33.376 | 32.933 | 37.471 | 37.053 | NA     | NA     | NA     | NA     | NA     | NA     | 14.148 | 13.805 | 18.600 | 20.422 | 61.146 | 61.818 |
| 81 | L | 9.584  | 9.730  | 43.373 | 41.725 | 33.452 | 32.608 | NA     | NA     | 52.631 | 53.357 | 26.550 | 27.439 | NA     | NA     | 11.628 | 10.615 | 17.699 | 16.643 | 59.462 | 60.468 |
| 81 | R | 10.164 | 10.274 | 43.250 | 43.339 | NA     | NA     | 39.790 | 42.292 | 50.338 | 51.491 | NA     | NA     | 30.995 | 32.075 | NA     | NA     | 21.987 | 22.403 | 62.379 | 58.687 |
| 82 | L | 7.600  | 7.228  | 48.606 | 52.219 | 26.592 | 28.649 | 37.604 | 39.066 | 50.373 | 50.339 | 37.912 | 41.391 | 28.584 | 28.388 | 9.254  | 10.000 | 20.027 | 17.411 | 58.848 | 57.940 |
| 82 | R | 8.055  | 7.459  | 48.309 | 48.438 | 28.312 | 28.835 | 35.383 | 35.961 | 49.594 | 51.560 | NA     | 60.392 | 58.722 |
| 83 | L | 9.166  | 9.436  | 47.859 | 47.408 | 27.296 | 25.155 | 33.699 | 36.581 | 49.002 | 51.906 | 29.230 | 27.890 | NA     | NA     | 12.843 | 14.476 | 16.393 | 15.324 | 66.310 | 63.303 |
| 83 | R | 9.283  | 9.561  | 47.065 | 49.412 | 27.408 | 27.029 | 39.450 | 40.128 | NA     | NA     | NA     | NA     | 29.042 | 29.516 | 14.266 | 14.599 | NA     | NA     | 59.439 | 54.511 |
| 85 | R | 9.795  | 10.457 | 42.988 | 41.863 | 34.382 | 36.911 | NA     | NA     | 50.953 | 50.232 | NA     | NA     | 27.387 | 27.471 | 8.574  | 8.430  | 25.971 | 25.591 | 51.908 | 52.874 |
| 86 | L | 8.987  | 10.577 | 45.938 | 45.159 | 33.469 | 33.137 | NA     | NA     | 56.183 | 56.883 | 33.067 | 33.806 | 24.489 | 24.769 | 15.043 | 13.423 | NA     | NA     | 64.603 | 63.376 |
| 86 | R | 6.237  | 6.401  | 49.842 | 50.415 | NA     | NA     | 34.663 | 34.287 | 52.381 | 53.091 | NA     | NA     | NA     | NA     | NA     | NA     | 23.064 | 23.959 | NA     | NA     |
| 88 | R | 10.494 | 11.614 | NA     | NA     | 31.653 | 31.765 | NA     | NA     | 54.001 | 52.858 | NA     | NA     | 26.758 | 27.842 | 10.517 | 10.580 | NA     | NA     | NA     | NA     |
| 89 | L | 10.797 | 10.767 | 51.783 | 49.062 | 30.097 | 30.907 | 43.344 | 41.239 | 50.603 | 49.800 | 29.270 | 28.021 | 32.313 | 31.785 | NA     | NA     | 13.235 | 13.201 | 62.421 | 64.888 |

|     |   |        |        |        |        |        |        |        |        |        |        |        |        |        |        |        |        |        |        |        |        |
|-----|---|--------|--------|--------|--------|--------|--------|--------|--------|--------|--------|--------|--------|--------|--------|--------|--------|--------|--------|--------|--------|
| 89  | R | 10.182 | 10.663 | 48.858 | 48.109 | 29.649 | 26.955 | 35.832 | 35.007 | 50.424 | 48.300 | NA     | NA     | 32.521 | 33.923 | 12.034 | 12.108 | 23.685 | 24.963 | NA     | NA     |
| 90  | L | 7.656  | 7.848  | 49.476 | 48.409 | 29.299 | 26.977 | NA     | NA     | 48.992 | 51.055 | NA     | NA     | 24.954 | 23.679 | 15.866 | 16.427 | 16.292 | 16.483 | 65.069 | 63.357 |
| 90  | R | 9.542  | 10.489 | 51.832 | 52.690 | NA     | NA     | 32.865 | 32.188 | 49.590 | 45.629 | 40.502 | 39.277 | 24.407 | 24.555 | 15.029 | 16.939 | 13.340 | 12.528 | NA     | NA     |
| 91  | R | 7.259  | 8.276  | 46.589 | 47.106 | 30.344 | 26.853 | 41.345 | 37.682 | 48.574 | 45.386 | NA     | NA     | 28.578 | 27.402 | 11.766 | 11.623 | 21.325 | 19.660 | NA     | NA     |
| 92  | R | 4.534  | 5.277  | 46.237 | 47.004 | NA     | NA     | 32.647 | 30.944 | 46.956 | 47.008 | NA     | NA     | NA     | NA     | 7.872  | 7.981  | NA     | NA     | 61.277 | 61.842 |
| 93  | L | 8.320  | 7.507  | 50.543 | 50.788 | NA     | NA     | 35.847 | 36.741 | 54.487 | 53.126 | 26.390 | 26.784 | 30.077 | 29.489 | 12.049 | 13.372 | 24.593 | 26.442 | 59.823 | 59.836 |
| 93  | R | 6.916  | 7.086  | NA     | NA     | 28.618 | 29.408 | 30.148 | 32.512 | NA     | NA     | 35.322 | 39.919 | 26.193 | 27.469 | NA     | NA     | 17.732 | 17.513 | NA     | NA     |
| 94  | L | 8.779  | 8.442  | 44.635 | 45.826 | 31.646 | 30.703 | 41.044 | 42.938 | 47.205 | 47.451 | NA     | NA     | 31.516 | 30.675 | 13.776 | 12.517 | 24.949 | 24.776 | 63.324 | 63.745 |
| 94  | R | 6.903  | 6.805  | 47.520 | 45.482 | 28.527 | 29.152 | NA     | NA     | NA     | NA     | 43.527 | 37.229 | 29.887 | 30.285 | 16.457 | 13.115 | NA     | NA     | 62.558 | 62.128 |
| 95  | R | 7.432  | 6.322  | 47.040 | 46.199 | 28.037 | 29.967 | NA     | NA     | 47.739 | 47.203 | NA     | NA     | 29.867 | 30.895 | NA     | NA     | NA     | NA     | NA     | NA     |
| 96  | L | 10.239 | 10.564 | 47.846 | 48.856 | 30.618 | 29.089 | 38.880 | 39.725 | 48.254 | 51.106 | 30.312 | 31.034 | 28.289 | 27.617 | 12.653 | 12.755 | 13.906 | 13.879 | 58.637 | 60.627 |
| 96  | R | 9.389  | 8.931  | 48.265 | 44.814 | NA     | NA     | 34.047 | 30.674 | 45.677 | 45.348 | 43.590 | 40.107 | 28.884 | 27.138 | 14.109 | 13.512 | 24.420 | 23.798 | 61.809 | 61.066 |
| 97  | L | 7.274  | 8.411  | 48.925 | 50.052 | 29.494 | 30.898 | 36.468 | 34.210 | 53.947 | 52.411 | 32.755 | 34.135 | 30.733 | 31.387 | NA     | NA     | 16.605 | 17.388 | 58.614 | 57.160 |
| 97  | R | 7.406  | 7.568  | 47.579 | 49.896 | 28.357 | 28.855 | NA     | NA     | NA     | NA     | NA     | NA     | 32.302 | 30.097 | 9.538  | 9.578  | 16.050 | 15.588 | 58.878 | 59.600 |
| 98  | L | 9.904  | 9.997  | NA     | NA     | 26.609 | 27.887 | 42.697 | 42.146 | 50.049 | 50.274 | NA     | NA     | 26.600 | 26.963 | 15.122 | 16.003 | NA     | NA     | NA     | NA     |
| 98  | R | 8.070  | 7.753  | 44.237 | 44.226 | 26.553 | 27.738 | NA     | NA     | 48.876 | 48.029 | 38.383 | 38.515 | 25.851 | 26.535 | 10.873 | 10.933 | 17.831 | 19.207 | 68.424 | 68.599 |
| 99  | L | 1.319  | 1.285  | 42.776 | 43.955 | 28.370 | 28.290 | 41.493 | 40.360 | 46.443 | 45.720 | 27.991 | 28.337 | 26.301 | 23.968 | 5.266  | 5.251  | NA     | NA     | 59.966 | 56.188 |
| 99  | R | 4.278  | 4.347  | 42.525 | 45.289 | 30.300 | 30.396 | 41.564 | 40.256 | NA     | NA     | NA     | NA     | 26.884 | 27.893 | 11.592 | 11.014 | 24.639 | 24.868 | NA     | NA     |
| 100 | R | 10.024 | 9.742  | NA     | NA     | NA     | NA     | 35.773 | 34.412 | NA     | NA     | 42.497 | 42.523 | NA     | NA     | 14.353 | 14.714 | 14.453 | 15.447 | NA     | NA     |
| 102 | L | 8.101  | 7.353  | 49.477 | 48.522 | 33.498 | 30.279 | 36.153 | 38.491 | 51.335 | 50.878 | 33.264 | 33.850 | 26.440 | 26.780 | 14.675 | 14.755 | 16.928 | 17.175 | 63.463 | 63.408 |
| 102 | R | 9.229  | 9.142  | 47.957 | 44.461 | 32.023 | 32.474 | NA     | NA     | NA     | NA     | NA     | NA     | 27.381 | 27.218 | 15.038 | 14.024 | NA     | NA     | 57.624 | 58.992 |
| 103 | R | 7.855  | 7.587  | 46.014 | 47.316 | 30.261 | 28.074 | 41.917 | 41.931 | NA     | NA     | 37.049 | 36.494 | 27.277 | 28.179 | 6.425  | 7.816  | NA     | NA     | NA     | NA     |
| 104 | L | 8.979  | 8.680  | 46.009 | 48.844 | 34.593 | 33.547 | NA     | NA     | NA     | NA     | 27.680 | 29.380 | 30.234 | 29.519 | 15.437 | 16.475 | 18.014 | 19.626 | 65.851 | 63.902 |
| 104 | R | 11.624 | 13.999 | 48.692 | 49.842 | 34.863 | 34.211 | 40.327 | 40.687 | 48.510 | 48.348 | NA     |
| 105 | L | 7.846  | 6.897  | 51.351 | 50.065 | 28.842 | 30.909 | 33.604 | 37.409 | 48.569 | 48.866 | 27.717 | 27.483 | 26.221 | 26.621 | 9.943  | 9.766  | NA     | NA     | 64.005 | 64.300 |
| 105 | R | 6.131  | 6.275  | 50.063 | 48.189 | 25.778 | 24.942 | 36.330 | 35.461 | NA     | NA     | 38.577 | 37.155 | 30.011 | 29.749 | NA     | NA     | 23.208 | 25.221 | 66.812 | 66.278 |
| 107 | L | 8.698  | 8.246  | 51.100 | 47.428 | 28.784 | 32.519 | NA     | NA     | 48.254 | 47.491 | 33.323 | 32.576 | 29.230 | 27.890 | 9.875  | 10.010 | 18.152 | 18.073 | 63.402 | 67.709 |
| 107 | R | 6.332  | 6.217  | 49.443 | 51.778 | 30.972 | 31.505 | 42.083 | 36.416 | 47.763 | 46.581 | NA     | NA     | NA     | NA     | 8.784  | 11.451 | 18.304 | 16.635 | 61.112 | 62.946 |
| 108 | L | 8.080  | 7.182  | 46.559 | 48.946 | 25.041 | 25.331 | 39.123 | 41.852 | 45.535 | 44.797 | 29.923 | 30.818 | 29.993 | 29.066 | 12.153 | 11.131 | 18.826 | 19.125 | 63.164 | 62.287 |
| 108 | R | 7.035  | 7.530  | 45.995 | 46.832 | NA     | NA     | 36.618 | 35.441 | NA     | NA     | NA     | NA     | 28.210 | 27.217 | 11.435 | 11.078 | 15.066 | 13.934 | NA     | NA     |
| 113 | L | 5.589  | 4.559  | 50.542 | 53.415 | 26.959 | 25.729 | 42.511 | 43.086 | 54.155 | 53.260 | 31.783 | 32.335 | NA     | NA     | 12.947 | 12.144 | 15.771 | 15.285 | NA     | NA     |



|     |   |        |        |        |        |        |        |        |        |        |        |        |        |        |        |        |        |        |        |        |        |
|-----|---|--------|--------|--------|--------|--------|--------|--------|--------|--------|--------|--------|--------|--------|--------|--------|--------|--------|--------|--------|--------|
| 113 | R | 3.461  | 3.551  | 47.978 | 47.019 | NA     | NA     | 41.563 | 41.665 | NA     | NA     | NA     | NA     | 31.394 | 31.959 | 10.305 | 11.807 | 13.630 | 13.879 | 45.981 | 60.434 |
| 114 | L | 7.224  | 7.242  | 44.841 | 45.610 | 28.963 | 30.343 | NA     | NA     | 53.951 | 52.371 | 28.016 | 28.094 | 29.270 | 28.021 | 4.451  | 3.464  | 20.011 | 19.879 | 64.607 | 63.943 |
| 114 | R | 9.781  | 8.805  | 45.971 | 45.626 | 30.310 | 29.545 | 39.990 | 39.361 | 54.619 | 51.937 | 36.180 | 35.904 | 29.872 | 30.365 | NA     | NA     | 22.609 | 19.846 | NA     | NA     |
| 115 | R | 6.444  | 7.427  | 43.780 | 43.733 | 25.323 | 27.798 | NA     | NA     | NA     | NA     | 39.667 | 38.782 | 32.696 | 32.116 | 17.339 | 16.643 | 19.685 | 17.956 | 55.487 | 55.333 |
| 116 | L | 7.547  | 8.067  | 48.412 | 47.748 | 28.964 | 29.951 | 37.351 | 38.758 | 52.218 | 52.302 | 30.955 | 30.406 | 31.607 | 34.032 | NA     | NA     | NA     | NA     | 60.371 | 58.521 |
| 116 | R | 11.016 | 10.938 | 49.259 | 47.867 | 27.044 | 27.707 | 36.905 | 34.986 | NA     | NA     | 38.376 | 41.076 | 33.522 | 33.788 | 7.054  | 6.097  | 19.439 | 18.358 | NA     | NA     |
| 117 | L | 8.322  | 7.620  | 48.231 | 48.382 | 30.421 | 29.181 | 41.246 | 40.919 | 50.827 | 50.189 | 32.204 | 31.019 | NA     | NA     | 14.200 | 13.485 | NA     | NA     | 60.284 | 60.567 |
| 117 | R | 8.731  | 9.931  | 47.907 | 49.513 | 27.438 | 28.225 | 38.318 | 38.417 | NA     | NA     | 39.761 | 37.972 | 29.027 | 29.868 | NA     | NA     | 25.599 | 22.102 | 62.472 | 65.508 |
| 118 | L | 5.946  | 5.677  | 49.790 | 49.578 | 30.462 | 29.554 | 38.160 | 37.837 | 43.933 | 45.457 | 34.323 | 35.498 | 32.077 | 31.463 | NA     | NA     | 18.673 | 18.872 | 63.929 | 61.523 |
| 118 | R | 2.680  | 2.776  | 54.259 | 52.648 | 30.254 | 30.642 | 37.333 | 36.867 | NA     | NA     | NA     | NA     | 31.683 | 31.880 | 10.598 | 9.825  | 20.058 | 20.058 | 66.424 | 66.508 |
| 119 | L | 6.109  | 6.785  | 41.235 | 41.352 | 28.299 | 31.191 | 46.700 | 42.828 | NA     | NA     | 30.621 | 30.643 | 26.390 | 26.784 | NA     | NA     | 25.652 | 24.954 | NA     | NA     |
| 119 | R | 3.881  | 4.110  | 44.208 | 44.444 | 27.881 | 31.139 | 42.591 | 42.871 | 52.882 | 53.713 | NA     | NA     | 26.601 | 26.531 | 12.542 | 12.499 | 22.687 | 24.386 | 60.857 | 62.220 |
| 120 | L | 5.281  | 7.159  | NA     | NA     | 27.970 | 28.005 | 40.192 | 40.443 | 52.625 | 52.346 | 43.843 | 46.332 | NA     | NA     | 10.754 | 10.820 | 19.629 | 20.864 | 61.871 | 59.839 |
| 120 | R | 7.209  | 7.683  | 44.097 | 43.132 | 27.653 | 26.794 | 38.207 | 36.886 | 50.526 | 49.803 | 42.507 | 41.832 | 29.982 | 29.795 | NA     | NA     | NA     | NA     | 60.115 | 61.707 |
| 121 | R | 10.476 | 9.345  | 47.084 | 46.860 | 29.464 | 29.670 | 39.620 | 41.135 | NA     | NA     | NA     | NA     | NA     | NA     | 10.943 | 10.971 | NA     | NA     | NA     | NA     |
| 122 | L | 7.533  | 8.549  | 51.380 | 52.276 | 28.463 | 31.835 | 41.327 | 39.956 | 45.950 | 47.982 | 30.827 | 31.005 | 31.085 | 29.967 | 13.634 | 14.152 | 25.628 | 25.536 | 61.516 | 60.416 |
| 122 | R | 7.842  | 8.217  | 55.434 | 57.615 | 32.773 | 32.621 | 39.386 | 39.638 | NA     | NA     | NA     | NA     | NA     | NA     | 11.893 | 11.702 | NA     | NA     | NA     | NA     |
| 123 | L | 3.948  | 2.945  | 43.490 | 43.362 | 31.644 | 32.668 | 48.673 | 46.959 | 51.110 | 49.000 | 36.675 | 39.200 | 30.312 | 31.034 | 12.752 | 11.244 | 18.583 | 19.689 | 58.436 | 57.745 |
| 123 | L | 3.948  | 2.945  | 43.490 | 43.362 | 31.644 | 32.668 | 48.673 | 46.959 | 51.110 | 49.000 | 33.524 | 32.833 | 30.312 | 31.034 | 12.752 | 11.244 | 18.583 | 19.689 | 58.436 | 57.745 |
| 123 | R | 6.948  | 6.982  | NA     | NA     | 32.029 | 33.891 | NA     | NA     | NA     | NA     | 37.366 | 37.355 | 31.940 | 31.819 | 8.542  | 9.160  | NA     | NA     | NA     | NA     |
| 123 | R | 6.948  | 6.982  | NA     | NA     | 32.029 | 33.891 | NA     | NA     | NA     | NA     | 39.659 | 41.001 | 31.940 | 31.819 | 8.542  | 9.160  | NA     | NA     | NA     | NA     |
| 124 | L | 9.461  | 8.880  | 46.058 | 49.684 | 28.266 | 27.186 | 41.425 | 43.073 | 52.261 | 50.900 | 31.082 | 32.168 | 32.755 | 34.135 | 11.921 | 12.283 | 19.664 | 18.799 | 62.831 | 62.223 |
| 124 | R | 12.927 | 12.926 | 47.854 | 47.217 | 25.488 | 26.807 | NA     | 13.641 | 12.577 | NA     | NA     | 61.010 | 59.402 |
| 125 | L | 6.939  | 5.282  | NA     | NA     | 26.629 | 26.702 | 36.430 | 39.905 | 51.046 | 51.089 | 30.047 | 32.624 | 27.991 | 28.337 | 10.314 | 8.933  | 25.157 | 24.056 | NA     | NA     |
| 125 | R | 10.030 | 9.894  | 47.826 | 47.846 | 24.134 | 24.386 | 31.143 | 32.649 | NA     | NA     | NA     | NA     | 30.390 | 29.795 | NA     | NA     | NA     | NA     | 54.878 | 52.565 |
| 126 | L | 9.300  | 7.786  | 43.060 | 44.714 | 31.196 | 30.864 | NA     | NA     | 57.327 | 55.393 | 34.895 | 33.729 | 33.720 | 33.093 | NA     | NA     | 20.815 | 21.438 | NA     | NA     |
| 126 | R | 7.922  | 8.291  | 41.729 | 42.811 | NA     | NA     | 35.377 | 36.850 | NA     | NA     | NA     | NA     | 30.001 | 30.717 | 8.192  | 8.872  | 21.367 | 21.344 | 64.623 | 64.273 |
| 127 | L | 9.117  | 10.058 | 46.568 | 46.447 | 30.612 | 31.524 | NA     | NA     | 50.169 | 53.539 | NA     | NA     | 33.264 | 33.850 | 11.662 | 10.905 | 16.451 | 18.109 | 66.626 | 65.929 |
| 127 | R | 8.559  | 8.666  | 46.469 | 48.811 | 27.057 | 28.050 | 34.128 | 34.282 | NA     | NA     | 45.449 | 48.118 | 34.679 | 33.800 | 9.263  | 9.022  | 21.473 | 19.780 | 67.339 | 67.424 |
| 128 | R | 9.199  | 8.806  | 41.711 | 42.286 | NA     | NA     | 40.177 | 39.714 | 51.915 | 52.033 | NA     | NA     | 28.070 | 27.404 | 15.801 | 14.948 | 15.071 | 15.838 | 57.148 | 53.353 |
| 129 | R | 9.121  | 10.002 | 49.759 | 50.449 | 28.402 | 28.876 | 39.033 | 40.623 | 50.121 | 54.935 | 39.052 | 39.507 | NA     | NA     | 16.347 | 15.025 | 16.129 | 15.817 | 56.167 | 58.250 |

|     |   |        |        |        |        |        |        |        |        |        |        |        |        |        |        |        |        |        |        |        |        |
|-----|---|--------|--------|--------|--------|--------|--------|--------|--------|--------|--------|--------|--------|--------|--------|--------|--------|--------|--------|--------|--------|
| 130 | L | 4.699  | 5.842  | 48.640 | 47.271 | 34.986 | 33.526 | 37.448 | 36.621 | 50.497 | 49.909 | 28.988 | 28.225 | 27.717 | 27.483 | 15.306 | 14.083 | 19.734 | 19.271 | 55.835 | 53.646 |
| 130 | R | 8.330  | 8.666  | 47.060 | 48.402 | NA     | NA     | 35.601 | 35.391 | NA     | NA     | 40.366 | 41.111 | 28.365 | 27.807 | 12.919 | 13.666 | 11.471 | 12.061 | NA     | NA     |
| 132 | L | 3.111  | 3.487  | 47.536 | 47.736 | 26.126 | 27.259 | 36.205 | 37.096 | 51.394 | 50.985 | NA     | NA     | NA     | NA     | 9.979  | 11.197 | 16.810 | 16.495 | 61.082 | 62.103 |
| 132 | R | 2.819  | 3.332  | 47.316 | 51.805 | 25.030 | 26.350 | 39.519 | 36.255 | 53.098 | 55.099 | 41.250 | 39.605 | 29.319 | 29.393 | 9.076  | 9.564  | NA     | NA     | 63.747 | 62.494 |
| 133 | L | 9.178  | 9.463  | 51.332 | 51.618 | 32.304 | 30.466 | 40.390 | 40.484 | NA     | NA     | 34.242 | 35.783 | 33.323 | 32.576 | 13.898 | 13.332 | 19.762 | 23.694 | 61.340 | 60.540 |
| 133 | R | 4.512  | 4.738  | 54.922 | 54.897 | 28.168 | 28.838 | 38.870 | 37.985 | 46.000 | 45.926 | NA     | NA     | 31.635 | 31.733 | 13.151 | 13.008 | 19.042 | 17.974 | 58.757 | 59.051 |
| 134 | R | 2.821  | 2.960  | 50.236 | 50.876 | 30.913 | 33.186 | 37.297 | 36.126 | NA     | NA     | 38.606 | 39.130 | 26.989 | 27.001 | 15.965 | 16.588 | 13.256 | 12.863 | 62.662 | 64.167 |
| 135 | L | 8.150  | 8.777  | 51.739 | 49.396 | 29.718 | 30.597 | NA     | NA     | NA     | NA     | NA     | NA     | 29.621 | 30.336 | 11.388 | 10.870 | 23.270 | 22.652 | 69.244 | 70.305 |
| 135 | R | 10.538 | 11.140 | 51.319 | 51.168 | 25.589 | 24.201 | 41.150 | 39.676 | 47.990 | 49.103 | 38.095 | 37.312 | 31.850 | 31.962 | 16.375 | 15.292 | NA     | NA     | 63.200 | 64.782 |
| 136 | L | 7.187  | 6.405  | 48.787 | 49.288 | 30.448 | 32.896 | 39.305 | 40.164 | 52.065 | 50.434 | NA     | NA     | 26.628 | 26.075 | 13.478 | 14.441 | 18.693 | 18.874 | NA     | NA     |
| 136 | R | 10.368 | 13.036 | 45.349 | 46.854 | 32.208 | 30.827 | NA     | NA     | 48.100 | 48.249 | 34.472 | 38.858 | NA     | NA     | NA     | NA     | NA     | NA     | 61.055 | 65.557 |
| 137 | L | 3.300  | 4.779  | 47.155 | 47.727 | NA     | NA     | NA     | NA     | NA     | NA     | 36.167 | 37.765 | 30.200 | 29.487 | NA     | NA     | NA     | NA     | 65.093 | 69.241 |
| 137 | R | 3.800  | 4.116  | 47.666 | 47.840 | 30.838 | 32.727 | 36.487 | 37.224 | 50.189 | 47.873 | 39.418 | 41.599 | 30.223 | 30.156 | 12.345 | 12.104 | 16.585 | 16.448 | NA     | NA     |
| 138 | L | 4.625  | 2.782  | 44.848 | 44.724 | NA     | 31.567 | 30.899 | 8.728  | 8.039  | 23.893 | 26.521 | 63.988 | 64.622 |
| 138 | R | 8.501  | 9.257  | 44.461 | 45.366 | 30.991 | 31.209 | 38.106 | 34.877 | 60.408 | 45.641 | 42.082 | 41.702 | NA     | NA     | 7.154  | 7.185  | 18.929 | 18.997 | 66.909 | 67.132 |
| 139 | R | 8.265  | 9.740  | 53.051 | 53.858 | 31.930 | 31.603 | 38.701 | 35.872 | NA     | NA     | 35.237 | 36.161 | 31.939 | 31.280 | 11.612 | 11.273 | NA     | NA     | NA     | NA     |
| 140 | L | 9.503  | 8.308  | NA     | NA     | 30.118 | 28.858 | NA     | NA     | 54.181 | 51.823 | NA     | NA     | 28.016 | 28.094 | 10.804 | 10.474 | 24.498 | 24.627 | 73.260 | 68.293 |
| 140 | R | 1.471  | 1.873  | 46.680 | 47.547 | 31.474 | 31.965 | 39.846 | 40.389 | NA     | NA     | 35.754 | 33.260 | 26.484 | 25.655 | 11.969 | 11.119 | NA     | NA     | 67.393 | 66.825 |
| 141 | L | 7.419  | 8.321  | 48.211 | 50.244 | NA     | NA     | NA     | NA     | 49.853 | 50.098 | 26.009 | 26.482 | 27.273 | 26.454 | 11.236 | 12.010 | 26.738 | 26.289 | 63.234 | 64.801 |
| 141 | R | 8.874  | 10.531 | 52.208 | 52.275 | 29.500 | 27.993 | 37.145 | 37.241 | 50.693 | 49.281 | NA     | NA     | 26.770 | 28.504 | 9.048  | 9.438  | 19.752 | 77.987 | 64.087 | 67.245 |
| 143 | L | 9.971  | 11.797 | 48.181 | 47.843 | 34.121 | 33.625 | NA     | NA     | 49.146 | 48.959 | 28.019 | 28.157 | 32.204 | 31.019 | 17.942 | 18.563 | NA     | NA     | 63.821 | 64.051 |
| 143 | R | 8.760  | 9.143  | 46.747 | 46.095 | 32.450 | 31.946 | 37.184 | 35.485 | NA     | NA     | 33.248 | 30.144 | 28.437 | 29.961 | 19.124 | 19.566 | 17.195 | 19.768 | 63.303 | 61.588 |
| 144 | L | 10.013 | 8.529  | 47.174 | 46.825 | 26.408 | 25.395 | NA     | NA     | 51.510 | 51.774 | 27.757 | 27.958 | 34.323 | 35.498 | 14.979 | 14.179 | 14.349 | 13.151 | NA     | NA     |
| 144 | R | 7.626  | 7.891  | 48.214 | 48.377 | NA     | NA     | 42.255 | 42.753 | 51.335 | 50.735 | 33.372 | 36.780 | 33.613 | 32.460 | 11.447 | 11.352 | NA     | NA     | 69.439 | 65.362 |
| 145 | L | 8.921  | 8.715  | 46.081 | 47.246 | NA     | NA     | NA     | NA     | 53.119 | 50.757 | 27.879 | 29.597 | 30.621 | 30.643 | 13.025 | 14.425 | 16.867 | 16.911 | 62.544 | 64.081 |
| 145 | R | 8.924  | 9.405  | 48.725 | 46.949 | 30.751 | 28.669 | 43.200 | 42.839 | NA     | NA     | NA     | NA     | 31.549 | 31.884 | NA     | NA     | 18.291 | 18.598 | 64.579 | 67.313 |
| 146 | L | 8.956  | 8.472  | 53.421 | 54.588 | 32.674 | 32.405 | NA     | NA     | 48.584 | 49.399 | 33.786 | 34.725 | 28.507 | 28.743 | 13.860 | 13.259 | NA     | NA     | 69.982 | 67.004 |
| 146 | R | 7.969  | 7.552  | 53.107 | 52.411 | 26.595 | 28.566 | 40.399 | 39.064 | 48.449 | 47.717 | NA     | NA     | 29.898 | 30.844 | NA     | NA     | 12.910 | 12.832 | NA     | NA     |
| 147 | L | 10.008 | 9.421  | NA     | NA     | 24.288 | 24.450 | 40.080 | 38.837 | NA     | NA     | 30.353 | 29.969 | 28.532 | 27.865 | NA     | NA     | 22.130 | 21.330 | NA     | NA     |
| 147 | R | 12.323 | 10.366 | 55.153 | 53.559 | 24.849 | 25.290 | 38.218 | 39.060 | 47.117 | 47.758 | NA     | NA     | 30.918 | 29.839 | 15.089 | 14.681 | 30.569 | 31.960 | 64.059 | 63.918 |
| 149 | L | 10.614 | 10.367 | NA     | NA     | 31.925 | 29.361 | 40.236 | 40.800 | 49.358 | 50.002 | NA     | NA     | NA     | NA     | 8.047  | 8.257  | 20.394 | 19.122 | NA     | NA     |

|     |   |        |        |        |        |        |        |        |        |         |        |        |        |        |        |        |        |        |        |        |        |
|-----|---|--------|--------|--------|--------|--------|--------|--------|--------|---------|--------|--------|--------|--------|--------|--------|--------|--------|--------|--------|--------|
| 149 | R | 9.661  | 9.003  | 48.116 | 46.555 | NA     | NA     | NA     | NA     | NA      | NA     | 39.717 | 40.827 | 29.896 | 30.026 | 10.030 | 10.040 | 13.888 | 14.615 | 65.036 | 66.313 |
| 150 | L | 7.791  | 8.120  | 53.168 | 55.244 | 33.400 | 32.687 | 41.745 | 41.093 | 55.696  | 51.435 | 28.083 | 27.727 | 35.475 | 35.112 | 11.912 | 11.847 | NA     | NA     | 58.054 | 61.503 |
| 150 | L | 7.791  | 8.120  | 53.168 | 55.244 | 33.400 | 32.687 | 41.745 | 41.093 | 55.696  | 51.435 | 28.083 | 27.727 | 33.524 | 32.833 | 11.912 | 11.847 | NA     | NA     | 58.054 | 61.503 |
| 151 | L | 12.584 | 11.304 | 53.138 | 49.808 | 30.045 | 28.575 | NA     | NA     | 128.736 | 51.313 | NA     | NA     | NA     | NA     | 10.173 | 9.981  | NA     | NA     | 71.821 | 73.012 |
| 151 | R | 10.312 | 8.384  | 55.476 | 54.211 | 29.118 | 30.939 | 39.871 | 35.872 | NA      | NA     | 40.349 | 42.295 | 30.257 | 30.706 | 7.707  | 8.383  | 16.331 | 15.898 | NA     | NA     |
| 152 | R | 8.991  | 11.722 | 47.811 | 47.682 | 28.449 | 29.327 | 35.434 | 35.264 | NA      | NA     | NA     | NA     | 34.524 | 34.003 | NA     | NA     | 20.012 | 18.660 | NA     | NA     |
| 153 | L | 2.139  | 2.201  | NA     | NA     | 33.282 | 32.252 | 38.269 | 37.838 | 49.095  | 49.227 | 25.895 | 25.391 | 30.047 | 32.624 | 15.795 | 16.025 | NA     | NA     | NA     | NA     |
| 155 | L | 6.046  | 6.063  | 47.173 | 45.080 | 30.123 | 31.080 | NA     | NA     | NA      | NA     | 32.014 | 31.725 | 31.148 | 31.154 | NA     | NA     | NA     | NA     | 58.485 | 58.871 |
| 155 | R | 8.992  | 10.004 | 48.999 | 46.532 | NA     | NA     | 34.772 | 33.733 | 53.955  | 53.158 | 39.741 | 39.688 | 36.151 | 34.397 | 10.858 | 10.645 | 23.249 | 23.567 | 55.495 | 56.595 |
| 156 | L | 5.560  | 4.116  | 53.259 | 51.499 | 26.208 | 25.697 | 39.153 | 37.528 | 54.859  | 55.305 | NA     | NA     | 27.450 | 27.784 | 16.250 | 17.459 | NA     | NA     | 64.439 | 63.897 |
| 156 | R | 6.017  | 6.897  | NA     | NA     | 27.010 | 26.950 | 38.401 | 38.857 | 53.260  | 55.092 | 34.208 | 33.620 | 30.069 | 30.185 | 15.671 | 16.412 | 15.329 | 13.918 | 66.433 | 67.276 |
| 157 | R | 4.185  | 4.520  | 47.362 | 49.107 | 31.617 | 30.992 | NA     | NA     | 48.612  | 49.277 | 41.105 | 39.731 | 28.497 | 27.715 | 14.790 | 15.329 | NA     | NA     | 67.397 | 68.996 |
| 158 | L | 10.561 | 11.841 | 47.629 | 47.648 | 31.207 | 29.865 | 38.011 | 39.106 | 45.180  | 45.722 | 29.573 | 28.192 | 28.988 | 28.225 | 15.142 | 15.787 | NA     | NA     | NA     | NA     |
| 158 | L | 10.561 | 11.841 | 47.629 | 47.648 | 31.207 | 29.865 | 38.011 | 39.106 | 45.180  | 45.722 | 29.573 | 28.192 | 28.988 | 28.225 | 14.663 | 14.301 | NA     | NA     | NA     | NA     |
| 158 | R | 5.914  | 5.696  | 46.510 | 47.274 | 29.585 | 29.551 | 41.195 | 43.787 | 45.535  | 44.335 | 43.328 | 43.938 | 31.561 | 30.162 | 12.725 | 11.877 | 17.789 | 14.970 | 63.115 | 63.572 |
| 158 | R | 5.914  | 5.696  | 46.510 | 47.274 | 29.585 | 29.551 | 41.195 | 43.787 | 45.535  | 44.335 | 43.328 | 43.938 | 31.561 | 30.162 | 12.857 | 12.975 | 17.789 | 14.970 | 63.115 | 63.572 |
| 161 | L | 11.645 | 11.522 | NA     | NA     | 27.755 | 25.429 | NA     | NA     | 53.111  | 52.032 | 32.793 | 32.903 | NA     | NA     | 14.017 | 13.742 | NA     | NA     | NA     | NA     |
| 161 | R | 12.837 | 12.387 | 51.877 | 51.039 | 28.352 | 28.489 | 32.308 | 33.160 | 50.543  | 48.973 | NA     | NA     | 29.714 | 30.132 | 13.654 | 12.530 | 19.701 | 19.680 | 64.656 | 64.445 |
| 165 | L | 4.434  | 4.198  | 44.832 | 45.857 | NA     | NA     | 39.091 | 38.029 | 43.681  | 45.638 | 28.066 | 27.772 | NA     | NA     | 12.461 | 13.580 | 16.629 | 16.238 | 66.453 | 69.316 |
| 165 | R | 12.557 | 12.687 | 43.141 | 42.662 | 31.250 | 31.269 | 36.597 | 36.435 | NA      | NA     | 38.895 | 35.999 | 28.400 | 29.047 | 12.052 | 11.793 | NA     | NA     | NA     | NA     |
| 167 | L | 9.772  | 9.890  | 45.305 | 45.606 | 35.053 | 32.478 | NA     | NA     | 46.833  | 47.704 | 30.020 | 30.542 | NA     | NA     | 9.764  | 10.099 | 18.319 | 17.527 | 54.920 | 56.859 |
| 167 | R | 7.991  | 7.927  | 43.583 | 42.351 | NA     | NA     | 35.236 | 35.790 | 50.352  | 50.758 | NA     | NA     | 30.083 | 30.289 | 14.696 | 14.976 | 25.281 | 25.671 | NA     | NA     |
| 169 | L | 6.878  | 7.401  | 49.800 | 46.338 | 32.889 | 29.665 | 42.102 | 41.050 | 51.558  | 49.801 | 30.966 | 30.860 | NA     | NA     | 12.145 | 11.925 | 13.731 | 13.207 | 66.400 | 68.350 |
| 170 | L | 4.884  | 5.363  | 50.747 | 50.574 | 29.535 | 28.211 | 39.894 | 39.694 | NA      | NA     | 30.180 | 31.300 | NA     | NA     | NA     | NA     | 19.938 | 19.573 | 66.763 | 70.429 |
| 170 | R | 9.580  | 9.241  | 53.149 | 52.366 | 24.509 | 25.639 | NA     | NA     | 50.578  | 53.499 | 34.202 | 35.219 | 27.359 | 27.757 | 16.649 | 17.278 | 13.957 | 14.002 | 61.773 | 63.205 |
| 171 | R | 6.645  | 8.648  | 50.577 | 50.614 | 27.009 | 26.799 | 35.983 | 34.966 | 49.324  | 51.454 | NA     | NA     | 30.370 | 30.937 | 13.736 | 15.798 | 13.584 | 14.144 | 65.473 | 66.161 |
| 174 | L | 7.940  | 9.546  | 47.426 | 47.214 | 30.255 | 31.421 | 38.774 | 37.918 | NA      | NA     | 28.703 | 28.879 | NA     | NA     | NA     | NA     | 19.668 | 19.256 | 54.693 | 55.199 |
| 175 | L | 9.600  | 9.170  | 46.399 | 47.503 | 32.198 | 35.078 | NA     | NA     | 56.251  | 55.573 | 36.036 | 37.391 | NA     | NA     | NA     | NA     | 25.515 | 25.913 | NA     | NA     |
| 175 | R | 10.183 | 10.794 | NA     | NA     | 32.828 | 31.383 | 36.479 | 37.990 | 55.832  | 59.851 | 39.974 | 38.772 | 30.104 | 30.883 | 18.315 | 21.437 | 21.734 | 21.281 | 60.270 | 62.155 |
| 176 | L | 10.096 | 10.932 | NA     | NA     | NA     | NA     | 39.745 | 39.541 | NA      | NA     | 41.676 | 39.925 | 26.009 | 26.482 | NA     | NA     | 20.810 | 19.671 | NA     | NA     |
| 176 | R | 9.105  | 8.874  | 50.286 | 47.191 | 30.616 | 30.563 | NA     | NA     | 55.919  | 58.688 | NA     | NA     | NA     | NA     | 18.741 | 18.190 | NA     | NA     | 56.837 | 55.635 |

|     |   |        |        |        |        |        |        |        |        |        |        |        |        |        |        |        |        |        |        |        |        |
|-----|---|--------|--------|--------|--------|--------|--------|--------|--------|--------|--------|--------|--------|--------|--------|--------|--------|--------|--------|--------|--------|
| 177 | L | 10.204 | 10.130 | 46.551 | 46.578 | 31.593 | 32.750 | 39.647 | 41.381 | 48.833 | 51.208 | 35.081 | 34.555 | 34.130 | 32.705 | NA     | NA     | NA     | NA     | 62.878 | 67.214 |
| 177 | R | 11.844 | 11.633 | 35.322 | 35.772 | 28.511 | 29.909 | 39.981 | 42.806 | 50.132 | 52.408 | 35.933 | 36.442 | 31.891 | 31.571 | 15.544 | 16.417 | 19.186 | 17.787 | NA     | NA     |
| 178 | L | 2.283  | 2.068  | 47.420 | 47.871 | 29.416 | 27.136 | 36.165 | 37.251 | 55.301 | 55.026 | 37.024 | 39.072 | NA     |
| 178 | R | 2.925  | 2.905  | 50.811 | 49.974 | 25.690 | 25.938 | 34.849 | 37.061 | 52.609 | 51.165 | NA     | NA     | 33.176 | 32.777 | 10.976 | 10.926 | 11.739 | 13.184 | 61.651 | 65.200 |
| 182 | L | 7.211  | 7.255  | 50.435 | 50.718 | 22.774 | 29.283 | 39.432 | 39.677 | 60.281 | 60.243 | 34.675 | 32.059 | 27.879 | 29.597 | NA     | NA     | 23.215 | 23.035 | NA     | NA     |
| 182 | R | 11.224 | 9.764  | 47.175 | 46.124 | NA     | NA     | NA     | NA     | NA     | NA     | 33.365 | 33.106 | 29.592 | 30.158 | 11.331 | 12.250 | NA     | NA     | 44.581 | 45.744 |
| 185 | L | 10.261 | 10.481 | 51.908 | 52.002 | 27.049 | 26.280 | NA     | NA     | NA     | NA     | 31.606 | 33.687 | 28.722 | 28.043 | 11.694 | 11.671 | NA     | NA     | 46.864 | 44.575 |
| 185 | R | 9.670  | 10.528 | 50.433 | 51.532 | 24.556 | 25.043 | 38.278 | 42.296 | 52.211 | 54.122 | 38.808 | 39.960 | 28.238 | 28.833 | 15.357 | 12.926 | 21.585 | 21.075 | 44.793 | 43.246 |
| 187 | L | 10.829 | 9.562  | NA     | NA     | NA     | NA     | NA     | NA     | 55.648 | 55.411 | 28.125 | 26.714 | NA     | NA     | 12.692 | 12.782 | 21.598 | 19.598 | 39.363 | 39.383 |
| 187 | R | 9.329  | 8.972  | 46.433 | 46.866 | 27.044 | 26.927 | 36.603 | 34.414 | 62.668 | 58.337 | NA     | NA     | 29.826 | 30.085 | NA     | NA     | 19.395 | 18.954 | 47.857 | 46.985 |
| 189 | L | 9.994  | 10.557 | 49.324 | 49.964 | 31.622 | 27.743 | 40.993 | 44.217 | 60.192 | 63.041 | NA     | NA     | NA     | NA     | 10.747 | 9.155  | 15.412 | 15.611 | 53.499 | 57.788 |
| 189 | R | 9.985  | 7.874  | 47.060 | 46.270 | 30.807 | 30.089 | 36.972 | 36.947 | 57.598 | 58.964 | 32.465 | 31.629 | 30.949 | 31.243 | NA     | NA     | NA     | NA     | NA     | NA     |
| 190 | L | 10.310 | 8.611  | 47.373 | 46.327 | 26.814 | 27.519 | 41.599 | 42.084 | 50.091 | 46.419 | NA     | NA     | 24.884 | 25.148 | 12.167 | 12.062 | 13.073 | 13.110 | 56.155 | 56.816 |
| 190 | L | 10.310 | 8.611  | 47.647 | 46.228 | 26.814 | 27.519 | 41.599 | 42.084 | 50.091 | 46.419 | NA     | NA     | 24.884 | 25.148 | 12.167 | 12.062 | 13.073 | 13.110 | 56.155 | 56.816 |
| 190 | R | 8.307  | 8.288  | 47.001 | 47.317 | 23.379 | 26.879 | 37.170 | 37.044 | 45.139 | 40.298 | 37.113 | 33.446 | 24.888 | 24.835 | 12.078 | 12.313 | 22.252 | 21.932 | 57.452 | 58.034 |
| 190 | R | 8.307  | 8.288  | 44.475 | 46.410 | 23.379 | 26.879 | 37.170 | 37.044 | 45.139 | 40.298 | 37.113 | 33.446 | 24.888 | 24.835 | 12.078 | 12.313 | 22.252 | 21.932 | 57.452 | 58.034 |
| 191 | L | 13.065 | 13.561 | 41.571 | 41.765 | 33.773 | 34.444 | NA     | NA     | 58.689 | 58.260 | 34.440 | 35.400 | 25.895 | 25.391 | 12.589 | 12.459 | 9.327  | 7.958  | 47.470 | 46.459 |
| 191 | R | 9.046  | 7.803  | 43.648 | 44.489 | 33.599 | 33.615 | 36.953 | 33.422 | NA     | NA     | 37.007 | 37.715 | 27.714 | 27.372 | NA     | NA     | NA     | NA     | 42.831 | 44.846 |
| 193 | R | 7.378  | 7.257  | 50.023 | 47.328 | 29.440 | 30.506 | 40.397 | 40.047 | 52.920 | 51.876 | NA     | NA     | NA     | NA     | 10.703 | 9.741  | 13.731 | 14.963 | 40.982 | 39.094 |
| 195 | L | 3.110  | 2.449  | 46.237 | 46.217 | 30.069 | 31.753 | NA     | NA     | 61.475 | 56.997 | 38.678 | 41.872 | 26.816 | 28.114 | 10.248 | 10.138 | 16.488 | 16.988 | 41.401 | 41.415 |
| 195 | R | 7.119  | 7.179  | 46.483 | 46.137 | 27.271 | 27.497 | 36.164 | 34.655 | 50.720 | 51.305 | 42.087 | 38.144 | 29.875 | 29.548 | 18.856 | 19.109 | 22.318 | 21.665 | 35.839 | 35.056 |
| 196 | L | 5.813  | 5.183  | 45.599 | 46.973 | 29.059 | 28.821 | 41.170 | 44.027 | NA     | NA     | 38.897 | 38.377 | 29.573 | 28.192 | 9.943  | 9.786  | 21.542 | 20.519 | 48.818 | 46.052 |
| 196 | R | 6.304  | 6.000  | 46.316 | 48.506 | 27.808 | 27.083 | 39.190 | 40.739 | 54.434 | 54.259 | NA     | NA     | 30.593 | 30.056 | NA     | NA     | 11.756 | 11.009 | NA     | NA     |
| 197 | R | 8.420  | 8.461  | 48.834 | 46.882 | 33.455 | 32.898 | 38.517 | 36.377 | 51.489 | 52.972 | 33.672 | 35.769 | 28.475 | 28.173 | 11.108 | 11.995 | 17.414 | 18.741 | 39.091 | 42.541 |
| 197 | R | 8.420  | 8.461  | 48.834 | 46.882 | 32.789 | 32.672 | 38.517 | 36.377 | 51.489 | 52.972 | 33.672 | 35.769 | 28.475 | 28.173 | 11.108 | 11.995 | 17.414 | 18.741 | 39.091 | 42.541 |
| 198 | R | 9.061  | 9.726  | 45.004 | 46.890 | 31.165 | 31.955 | 42.566 | 39.785 | 53.900 | 56.614 | 48.096 | 46.206 | NA     | NA     | NA     | NA     | 16.538 | 16.345 | 36.926 | 36.469 |
| 199 | L | 5.326  | 7.097  | 45.208 | 45.964 | 31.420 | 31.108 | 46.622 | 43.484 | 48.732 | 53.057 | NA     | NA     | 32.793 | 32.903 | 10.364 | 10.444 | NA     | NA     | 43.217 | 40.438 |
| 199 | R | 9.386  | 8.541  | 45.592 | 47.435 | NA     | NA     | 39.867 | 41.929 | 45.419 | 46.297 | 43.753 | 39.083 | 29.075 | 28.645 | NA     | NA     | 16.426 | 16.141 | 42.154 | 44.833 |
| 200 | L | 9.947  | 9.977  | 45.812 | 45.630 | 33.661 | 34.611 | 43.419 | 43.762 | NA     | NA     | NA     | NA     | 27.055 | 27.682 | 8.434  | 8.999  | 19.165 | 20.447 | 37.704 | 37.119 |
| 200 | R | 9.811  | 8.732  | 44.469 | 43.591 | 33.347 | 31.962 | 44.365 | 42.401 | 53.124 | 56.859 | 36.507 | 37.558 | 30.160 | 29.397 | 10.560 | 10.624 | 17.538 | 17.078 | 48.706 | 53.080 |
| 201 | L | 9.694  | 9.860  | 48.315 | 49.431 | 34.855 | 33.873 | 39.763 | 39.053 | 50.122 | 52.197 | 40.453 | 38.687 | 35.417 | 34.362 | 14.573 | 14.605 | NA     | NA     | 36.547 | 36.547 |

|     |   |        |        |        |        |        |        |        |        |        |        |        |        |        |        |        |        |        |        |        |        |
|-----|---|--------|--------|--------|--------|--------|--------|--------|--------|--------|--------|--------|--------|--------|--------|--------|--------|--------|--------|--------|--------|
| 201 | R | 11.093 | 9.476  | 43.396 | 43.591 | 29.841 | 30.447 | NA     | NA     | 47.163 | 50.193 | 38.314 | 37.281 | 31.563 | 32.211 | NA     | NA     | 15.101 | 15.350 | 39.294 | 39.294 |
| 202 | L | 9.272  | 9.396  | NA     | NA     | 30.891 | 31.963 | 38.531 | 35.882 | 56.088 | 57.991 | 38.718 | 38.726 | 30.399 | 28.873 | 13.265 | 12.575 | 25.610 | 26.891 | 41.002 | 43.016 |
| 203 | L | 7.478  | 9.153  | 51.311 | 50.043 | NA     | NA     | 43.826 | 44.115 | 47.063 | 44.167 | 36.134 | 32.005 | 28.066 | 27.772 | NA     | NA     | 15.065 | 17.956 | NA     | NA     |
| 203 | R | 3.190  | 3.694  | 51.053 | 83.977 | 29.312 | 30.706 | 42.461 | 44.531 | NA     | NA     | 42.170 | 40.997 | 29.689 | 29.665 | 17.257 | 17.453 | 17.330 | 19.481 | 39.175 | 43.836 |
| 204 | L | 8.054  | 7.545  | 48.647 | 51.047 | NA     | NA     | 45.500 | 42.195 | 59.782 | 62.604 | 39.253 | 36.199 | 27.458 | 27.885 | 11.352 | 11.612 | 20.113 | 21.223 | 37.183 | 39.911 |
| 204 | R | 6.902  | 6.174  | NA     | NA     | 26.513 | 28.391 | 43.983 | 39.080 | 53.165 | 53.266 | NA     | NA     | 28.754 | 29.708 | 10.501 | 11.005 | 16.423 | 18.751 | 43.887 | 47.351 |
| 206 | L | 9.234  | 8.877  | NA     | NA     | NA     | NA     | NA     | NA     | 52.887 | 55.926 | 35.390 | 37.661 | 30.020 | 30.542 | NA     | NA     | 22.052 | 20.677 | 49.889 | 47.846 |
| 206 | R | 5.108  | 5.629  | 49.055 | 49.678 | 30.887 | 31.149 | 42.458 | 44.515 | 50.644 | 50.175 | 36.046 | 38.629 | 31.007 | 31.005 | 12.765 | 12.522 | 21.757 | 19.739 | NA     | NA     |
| 210 | L | 14.610 | 13.782 | NA     | NA     | 30.153 | 29.067 | 34.153 | 36.844 | NA     | NA     | 37.879 | 39.993 | 30.180 | 31.300 | 15.338 | 16.111 | 16.793 | 17.237 | 43.822 | 42.919 |
| 210 | R | 9.715  | 9.525  | 47.552 | 48.955 | 27.039 | 27.055 | NA     | NA     | 50.825 | 50.319 | 39.737 | 38.474 | 31.612 | 30.462 | 12.003 | 12.238 | 16.914 | 17.517 | NA     | NA     |
| 211 | L | 7.086  | 8.958  | NA     | NA     | 33.415 | 33.232 | 38.813 | 39.553 | 42.101 | 47.574 | NA     | NA     | 27.328 | 27.689 | 10.119 | 9.838  | 17.925 | 17.509 | 45.580 | 44.481 |
| 213 | R | 6.639  | 6.414  | 48.162 | 46.560 | 32.794 | 30.743 | NA     | NA     | 47.519 | 47.166 | 36.060 | 38.643 | 26.229 | 25.960 | 16.013 | 16.238 | 21.393 | 19.979 | 45.867 | 45.626 |
| 215 | L | 12.710 | 12.844 | NA     | NA     | NA     | NA     | NA     | NA     | 49.558 | 50.298 | 40.463 | 43.845 | 28.703 | 28.879 | 17.033 | 17.310 | 21.539 | 21.779 | 39.205 | 43.880 |
| 215 | R | 11.205 | 13.100 | 47.317 | 45.386 | 32.453 | 32.555 | 37.048 | 39.758 | NA     | NA     | 38.819 | 42.245 | 27.683 | 27.313 | 20.749 | 19.032 | 22.922 | 22.417 | NA     | NA     |
| 216 | L | 9.350  | 9.248  | NA     | NA     | NA     | NA     | 33.665 | 29.351 | 52.857 | 56.501 | 26.196 | 26.247 | 25.653 | 24.705 | NA     | NA     | 14.898 | 14.317 | NA     | NA     |
| 217 | L | 9.677  | 9.842  | NA     | NA     | NA     | NA     | 38.154 | 41.744 | 38.148 | 38.172 | NA     | NA     | 30.766 | 30.766 | NA     | NA     | NA     | NA     | NA     | NA     |
| 217 | R | 7.322  | 8.323  | 53.099 | 52.589 | 31.705 | 32.671 | 33.948 | 35.730 | 41.144 | 41.738 | 47.747 | 45.567 | 30.047 | 31.878 | 16.398 | 15.822 | 15.544 | 16.857 | 43.354 | 41.434 |
| 219 | L | 10.213 | 10.063 | NA     | NA     | NA     | NA     | 41.330 | 45.253 | 46.685 | 49.937 | 41.832 | 41.639 | 32.772 | 33.649 | 11.949 | 12.209 | 14.643 | 14.504 | 65.216 | 65.744 |
| 219 | R | 9.679  | 9.454  | 49.050 | 49.039 | 30.695 | 29.454 | 44.218 | 45.815 | NA     | NA     | 42.845 | 42.381 | 32.850 | 31.123 | 12.869 | 12.763 | 19.248 | 20.136 | 61.328 | 61.976 |
| 220 | L | 11.075 | 11.377 | NA     | NA     | NA     | NA     | 37.417 | 38.047 | 49.879 | 50.354 | 35.140 | 35.743 | 28.877 | 30.360 | 20.612 | 20.530 | NA     | NA     | 70.442 | 68.778 |
| 220 | R | 10.360 | 11.035 | 46.230 | 45.192 | 28.340 | 27.436 | 36.300 | 39.312 | 51.777 | 49.369 | 33.703 | 33.668 | 29.696 | 30.791 | 17.285 | 17.666 | 14.562 | 13.664 | 68.889 | 71.056 |
| 224 | L | 13.363 | 12.967 | NA     | NA     | NA     | NA     | 39.978 | 35.487 | 47.329 | 49.617 | NA     | NA     | NA     | NA     | NA     | NA     | 27.485 | 28.513 | NA     | NA     |
| 226 | L | 10.791 | 10.742 | NA     | NA     | NA     | NA     | 38.017 | 42.588 | 52.923 | 50.723 | NA     | NA     | 26.686 | 27.043 | 15.904 | 14.161 | 19.864 | 20.729 | 56.490 | 56.331 |
| 227 | L | 7.810  | 7.000  | 51.151 | 51.357 | NA     | NA     | NA     | NA     | 47.602 | 47.385 | NA     | NA     | 28.919 | 29.695 | 10.624 | 11.175 | 15.435 | 14.109 | 55.964 | 58.842 |
| 227 | R | 7.159  | 7.407  | 49.768 | 51.777 | 26.357 | 27.188 | 41.146 | 36.418 | NA     | NA     | 35.240 | 35.025 | 30.009 | 30.183 | 12.783 | 12.554 | NA     | NA     | 54.793 | 56.299 |
| 228 | R | 3.699  | 3.328  | NA     | NA     | 26.939 | 26.556 | 42.418 | 42.143 | 44.940 | 45.862 | NA     | NA     | 32.117 | 33.033 | 13.995 | 13.937 | 18.334 | 19.093 | NA     | NA     |
| 229 | L | 8.145  | 8.040  | NA     | NA     | NA     | NA     | 37.914 | 41.028 | 42.870 | 41.269 | 41.143 | 37.009 | 33.185 | 33.454 | NA     | NA     | NA     | NA     | 57.926 | 57.154 |
| 229 | R | 8.221  | 8.593  | 47.605 | 47.348 | 26.522 | 24.538 | 40.662 | 40.100 | 47.019 | 48.714 | 37.113 | 39.227 | 32.563 | 32.125 | 14.934 | 14.202 | 16.211 | 16.579 | 56.793 | 55.298 |
| 230 | L | 10.305 | 11.355 | 43.844 | 42.468 | 30.705 | 28.675 | 42.028 | 45.286 | 42.330 | 42.069 | 34.730 | 30.178 | 28.125 | 26.714 | 15.987 | 15.407 | 17.154 | 18.243 | NA     | NA     |
| 414 | R | 9.898  | 9.756  | 48.433 | 51.060 | 24.056 | 26.525 | 41.219 | 40.789 | 50.426 | 49.667 | NA     | NA     | 27.461 | 27.603 | 18.498 | 19.426 | NA     | NA     | NA     | NA     |
| 414 | L | 4.591  | 5.404  | 49.650 | 49.976 | 24.326 | 27.773 | 40.157 | 41.853 | 51.082 | 51.880 | 29.965 | 29.983 | 25.147 | 24.807 | 13.557 | 15.075 | 21.597 | 13.729 | NA     | NA     |

|     |   |        |        |        |        |        |        |        |        |        |        |        |        |        |        |        |        |        |        |    |    |
|-----|---|--------|--------|--------|--------|--------|--------|--------|--------|--------|--------|--------|--------|--------|--------|--------|--------|--------|--------|----|----|
| 415 | R | 6.925  | 8.442  | 44.592 | 43.865 | 27.967 | 28.303 | NA     | NA     | 50.482 | 51.262 | NA     | NA     | 33.428 | 31.407 | 8.945  | 8.666  | 16.022 | 16.087 | NA | NA |
| 415 | L | 11.356 | 12.593 | 45.296 | 46.314 | NA     | NA     | 40.424 | 36.845 | 49.230 | 49.971 | 28.892 | 29.235 | 32.056 | 31.976 | 7.369  | 8.229  | NA     | NA     | NA | NA |
| 416 | R | 5.682  | 4.914  | NA     | NA     | 20.484 | 23.035 | 41.317 | 38.842 | NA     | NA     | 35.915 | 36.592 | 26.978 | 27.125 | 10.009 | 9.342  | 20.149 | 18.997 | NA | NA |
| 416 | L | 7.842  | 5.620  | 51.326 | 51.803 | 25.712 | 26.227 | 41.003 | 39.636 | 55.152 | 52.338 | 32.193 | 31.846 | 29.377 | 28.764 | 13.414 | 12.912 | NA     | NA     | NA | NA |
| 417 | R | 8.399  | 8.520  | 56.338 | 55.776 | NA     | 29.151 | 28.908 | NA     | NA     | 14.805 | 12.359 | NA | NA |
| 417 | L | 6.118  | 6.207  | 53.776 | 52.116 | 22.050 | 24.079 | 41.720 | 42.196 | 50.714 | 48.472 | 28.667 | 28.648 | 28.211 | 27.603 | 10.595 | 11.809 | 11.079 | 10.754 | NA | NA |
| 418 | R | 5.980  | 6.556  | 46.258 | 44.705 | 24.368 | 22.766 | NA     | NA     | 47.655 | 49.486 | NA     | NA     | 29.060 | 28.900 | 15.992 | 15.823 | 15.429 | 15.301 | NA | NA |
| 418 | L | 8.822  | 8.558  | 45.954 | 46.269 | 23.131 | 23.194 | 40.121 | 39.951 | 50.484 | 50.429 | 32.077 | 32.286 | NA     | NA     | 15.905 | 15.053 | NA     | NA     | NA | NA |
| 421 | R | 9.007  | 9.661  | 48.966 | 45.097 | 18.012 | 21.499 | NA     | NA     | 42.952 | 40.983 | NA     | NA     | 29.239 | 29.967 | 13.045 | 13.488 | NA     | NA     | NA | NA |
| 422 | R | 9.249  | 9.517  | 46.043 | 46.626 | NA     | 30.120 | 30.939 | 11.474 | 11.204 | 22.314 | 23.223 | NA | NA |
| 423 | R | 13.421 | 13.967 | 46.860 | 46.972 | NA     | NA     | 38.849 | 39.581 | 45.630 | 46.321 | 40.555 | 35.950 | NA     | NA     | 6.698  | 7.489  | NA     | NA     | NA | NA |
| 423 | L | 10.121 | 9.235  | 47.080 | 47.973 | 26.332 | 27.997 | 43.694 | 44.052 | 52.267 | 53.344 | 27.408 | 27.547 | 25.343 | 24.226 | NA     | NA     | 23.504 | 27.504 | NA | NA |
| 424 | R | 8.504  | 8.446  | 49.613 | 47.804 | 30.881 | 30.332 | 39.168 | 36.793 | 49.262 | 52.943 | NA     | NA     | 32.230 | 32.838 | 15.395 | 16.745 | 15.295 | 14.712 | NA | NA |
| 426 | R | 8.034  | 8.390  | 43.683 | 43.948 | NA     | 30.613 | 29.548 | 10.213 | 10.737 | 14.173 | 15.187 | NA | NA |
| 426 | L | 1.657  | 2.008  | 47.433 | 49.303 | 26.706 | 27.913 | 39.407 | 39.456 | 46.782 | 47.178 | 29.541 | 28.224 | 32.383 | 31.824 | 14.729 | 14.826 | 15.580 | 13.587 | NA | NA |
| 427 | R | 8.137  | 8.000  | NA     | NA     | 23.445 | 23.225 | 40.184 | 40.760 | NA     | NA     | NA     | NA     | 30.512 | 29.396 | 6.839  | 7.050  | 25.767 | 25.631 | NA | NA |
| 427 | L | 1.495  | 1.747  | 55.982 | 55.062 | NA     | NA     | 40.430 | 39.890 | 50.916 | 51.450 | 29.902 | 30.136 | 27.167 | 27.977 | NA     | NA     | NA     | NA     | NA | NA |
| 428 | R | 6.552  | 6.409  | 43.473 | 43.432 | 25.435 | 25.472 | 42.486 | 40.383 | 49.992 | 51.795 | NA     | NA     | 28.895 | 29.338 | 9.785  | 10.511 | 17.837 | 17.438 | NA | NA |
| 428 | L | 8.204  | 7.830  | 42.586 | 43.164 | NA     | NA     | NA     | NA     | 49.840 | 50.742 | 28.214 | 27.620 | 28.642 | 29.669 | 9.263  | 9.902  | NA     | NA     | NA | NA |
| 429 | R | 9.820  | 10.718 | 46.779 | 46.828 | 28.900 | 26.710 | NA     | NA     | NA     | NA     | NA     | NA     | 30.354 | 31.557 | NA     | NA     | NA     | NA     | NA | NA |
| 429 | L | 9.202  | 9.539  | 47.730 | 48.974 | 22.535 | 25.028 | 39.585 | 40.028 | 44.896 | 43.603 | 30.794 | 31.169 | 30.026 | 30.842 | 16.374 | 16.360 | 19.620 | 21.421 | NA | NA |
| 431 | R | 5.993  | 6.359  | 48.454 | 48.930 | 31.002 | 30.471 | 35.916 | 34.553 | 45.330 | 48.997 | NA     | NA     | 33.932 | 35.157 | 7.551  | 6.843  | NA     | NA     | NA | NA |
| 432 | R | 6.551  | 6.293  | 44.165 | 43.739 | 23.652 | 24.398 | 33.995 | 34.671 | 48.116 | 48.170 | NA     | NA     | 33.201 | 31.475 | NA     | NA     | NA     | NA     | NA | NA |
| 433 | R | 11.669 | 11.586 | 49.570 | 48.062 | 26.258 | 26.636 | 43.099 | 43.326 | 56.718 | 60.087 | NA     | NA     | 30.143 | 30.104 | 13.105 | 13.910 | 18.519 | 19.452 | NA | NA |
| 433 | L | 12.162 | 9.801  | 49.032 | 49.585 | 25.312 | 25.452 | 41.157 | 41.145 | NA     | NA     | 38.752 | 38.737 | NA     | NA     | 13.202 | 12.930 | 16.310 | 16.337 | NA | NA |
| 434 | R | 8.863  | 8.866  | NA     | NA     | 25.071 | 25.962 | 35.247 | 35.127 | 49.134 | 49.505 | NA     | NA     | 30.108 | 29.476 | 9.156  | 8.166  | 18.015 | 19.363 | NA | NA |
| 434 | L | 9.655  | 9.785  | 46.008 | 44.268 | 26.347 | 27.814 | NA     | NA     | 49.707 | 49.481 | 33.509 | 33.658 | 28.557 | 29.257 | 12.326 | 11.965 | NA     | NA     | NA | NA |
| 435 | R | 8.877  | 8.847  | 48.289 | 47.371 | 25.478 | 28.015 | 42.398 | 43.365 | 50.037 | 51.553 | NA     | NA     | 32.250 | 31.842 | NA     | NA     | 22.180 | 20.736 | NA | NA |
| 436 | R | 10.260 | 10.237 | 45.451 | 47.949 | 29.536 | 30.554 | NA     | NA     | 50.952 | 50.940 | NA     | NA     | 26.905 | 28.206 | 6.165  | 5.240  | 20.199 | 20.186 | NA | NA |
| 436 | L | 3.871  | 4.925  | 49.760 | 49.146 | 30.299 | 29.927 | 35.220 | 38.455 | 48.201 | 47.876 | 27.640 | 26.578 | 25.872 | 26.729 | 10.806 | 11.454 | 16.284 | 15.667 | NA | NA |
| 437 | R | 9.175  | 9.166  | 44.014 | 44.610 | 29.607 | 29.081 | 39.847 | 38.337 | 51.966 | 51.369 | NA     | NA     | 29.605 | 29.022 | 13.307 | 13.295 | 22.736 | 21.823 | NA | NA |

|     |   |        |        |        |        |        |        |        |        |        |        |        |        |        |        |        |        |        |        |    |    |
|-----|---|--------|--------|--------|--------|--------|--------|--------|--------|--------|--------|--------|--------|--------|--------|--------|--------|--------|--------|----|----|
| 437 | L | 11.091 | 11.238 | 44.204 | 44.372 | 28.054 | 29.738 | 38.924 | 38.961 | 52.181 | 51.829 | 29.697 | 29.153 | 27.318 | 28.053 | 15.512 | 14.417 | NA     | NA     | NA | NA |
| 438 | L | 9.276  | 9.321  | 47.496 | 48.600 | 27.500 | 29.233 | NA     | NA     | 51.141 | 49.246 | 27.744 | 29.670 | 33.325 | 33.503 | 11.203 | 10.670 | 23.321 | 14.417 | NA | NA |
| 439 | L | 8.239  | 8.864  | 44.467 | 44.782 | 30.639 | 30.532 | 37.212 | 38.576 | 49.757 | 47.254 | 25.153 | 25.131 | 30.099 | 28.825 | 7.447  | 8.297  | NA     | NA     | NA | NA |
| 440 | R | 8.894  | 9.450  | 48.486 | 48.869 | 26.600 | 29.874 | NA     | NA     | 47.865 | 48.326 | 35.903 | 40.420 | NA     | NA     | 20.060 | 20.646 | NA     | NA     | NA | NA |
| 440 | L | 7.579  | 10.181 | 54.170 | 51.949 | NA     | NA     | 39.632 | 39.724 | 54.582 | 56.893 | 31.807 | 32.998 | 30.365 | 29.245 | 17.825 | 19.332 | 25.553 | 18.200 | NA | NA |
| 441 | R | 8.499  | 9.141  | 50.586 | 54.291 | 29.087 | 30.833 | 34.709 | 34.393 | 41.144 | 41.738 | NA     | NA     | 28.507 | 28.696 | 2.509  | 2.224  | 21.597 | 22.883 | NA | NA |
| 441 | L | 4.729  | 5.626  | 46.220 | 47.494 | 33.714 | 35.462 | 36.588 | 37.690 | 38.148 | 38.172 | 29.199 | 29.548 | 31.095 | 30.211 | 20.423 | 21.362 | NA     | NA     | NA | NA |
| 442 | R | 7.107  | 7.116  | 42.661 | 44.224 | NA     | NA     | 39.946 | 41.038 | 42.069 | 42.481 | NA     | NA     | 29.710 | 29.099 | 9.293  | 10.950 | NA     | NA     | NA | NA |
| 442 | L | 7.151  | 6.550  | 47.802 | 46.119 | 24.690 | 24.814 | NA     | NA     | 50.835 | 53.275 | 31.079 | 31.569 | 32.831 | 32.330 | 6.787  | 8.274  | 20.503 | 21.462 | NA | NA |
| 443 | R | 8.662  | 8.908  | 47.020 | 50.432 | 28.756 | 27.500 | NA     | NA     | 45.089 | 50.156 | NA     | NA     | NA     | NA     | NA     | NA     | 22.529 | 23.069 | NA | NA |
| 446 | R | 7.162  | 7.851  | 46.880 | 47.382 | 23.539 | 24.220 | 42.600 | 43.695 | 40.821 | 45.826 | NA     | NA     | 30.857 | 32.410 | 9.654  | 9.257  | 20.161 | 20.038 | NA | NA |
| 446 | L | 9.462  | 8.540  | 47.177 | 44.289 | 25.697 | 27.728 | 40.670 | 40.524 | 48.445 | 56.212 | 30.292 | 29.665 | 33.585 | 33.124 | 8.603  | 8.622  | 16.068 | 15.431 | NA | NA |
| 447 | R | 9.571  | 9.890  | 55.272 | 55.449 | 23.472 | 22.216 | NA     | NA     | NA     | NA     | NA     | NA     | 28.853 | 27.933 | 15.504 | 15.518 | 16.227 | 16.322 | NA | NA |
| 447 | L | 3.324  | 3.446  | 55.843 | 57.380 | 25.334 | 26.193 | 37.978 | 38.046 | 53.259 | 55.541 | 30.543 | 31.002 | 28.686 | 29.034 | 19.626 | 19.260 | NA     | NA     | NA | NA |
| 448 | R | 7.842  | 9.212  | 54.180 | 53.904 | 25.524 | 26.576 | 37.342 | 37.008 | 55.860 | 55.029 | NA     | NA     | 26.640 | 27.322 | 7.358  | 6.638  | 18.116 | 19.213 | NA | NA |
| 448 | L | 7.333  | 7.882  | 53.569 | 51.326 | 27.417 | 27.280 | NA     | NA     | 47.329 | 49.617 | 33.565 | 33.833 | 26.311 | 25.878 | 15.379 | 16.299 | 24.312 | 22.758 | NA | NA |
| 449 | R | 7.809  | 7.929  | 49.242 | 50.616 | NA     | NA     | 37.191 | 38.326 | 44.273 | 47.066 | 36.595 | 35.513 | 29.009 | 29.128 | 13.744 | 13.936 | 13.755 | 14.596 | NA | NA |
| 449 | L | 6.884  | 6.789  | 47.721 | 47.602 | 25.876 | 27.921 | 39.221 | 38.874 | 55.561 | 53.869 | 27.355 | 26.518 | 30.164 | 29.731 | NA     | NA     | NA     | NA     | NA | NA |
| 451 | L | 6.656  | 7.035  | 54.145 | 54.561 | 31.858 | 31.388 | 38.158 | 37.995 | 49.009 | 48.437 | 30.212 | 29.838 | 32.923 | 33.111 | 8.293  | 8.508  | 21.249 | 23.080 | NA | NA |
| 453 | R | 11.112 | 10.096 | NA     | NA     | 20.812 | 21.722 | NA     | NA     | 40.433 | 43.828 | 36.279 | 36.705 | 27.895 | 27.236 | 11.214 | 10.781 | 16.938 | 17.862 | NA | NA |
| 453 | L | 8.063  | 8.337  | 50.375 | 48.125 | 24.386 | 23.222 | 36.846 | 38.560 | 42.330 | 42.069 | 30.489 | 30.896 | 28.069 | 26.515 | 12.132 | 11.934 | NA     | NA     | NA | NA |
| 454 | L | 12.859 | 15.136 | 53.115 | 51.636 | 31.642 | 32.603 | 40.206 | 38.763 | NA     | NA     | 27.825 | 27.213 | 26.053 | 24.815 | 7.324  | 7.731  | 19.702 | 19.242 | NA | NA |
| 455 | R | 8.835  | 8.135  | 56.991 | 54.305 | 35.291 | 37.174 | 39.103 | 38.952 | NA     | NA     | NA     | NA     | 32.601 | 32.708 | NA     | NA     | 14.465 | 14.990 | NA | NA |
| 455 | L | 7.066  | 6.346  | 52.392 | 51.365 | 31.378 | 34.219 | 41.190 | 38.846 | 55.898 | 56.551 | 29.846 | 30.106 | 30.440 | 32.604 | 10.006 | 9.820  | NA     | NA     | NA | NA |
| 456 | R | 9.919  | 9.595  | 48.760 | 47.536 | 27.539 | 26.125 | NA     | NA     | 46.875 | 48.901 | 40.225 | 40.013 | 32.621 | 32.482 | 11.331 | 11.850 | 20.211 | 21.421 | NA | NA |
| 456 | L | 7.312  | 7.649  | 46.536 | 45.699 | NA     | NA     | 37.825 | 37.523 | 46.057 | 47.625 | 27.605 | 27.115 | 33.487 | 32.811 | 9.924  | 10.163 | NA     | NA     | NA | NA |
| 459 | R | 7.755  | 8.139  | 44.372 | 43.361 | 25.981 | 25.356 | 34.962 | 36.163 | 35.235 | 38.485 | 38.944 | 32.874 | NA     | NA     | 10.816 | 10.806 | 15.171 | 15.105 | NA | NA |
| 459 | L | 5.849  | 3.478  | 42.659 | 41.531 | 25.960 | 25.889 | 35.989 | 37.046 | 43.674 | 44.707 | 32.067 | 33.265 | 32.215 | 33.178 | 8.207  | 8.479  | NA     | NA     | NA | NA |
| 460 | R | 8.259  | 8.602  | 46.904 | 46.273 | 29.925 | 31.068 | 35.710 | 33.530 | 45.085 | 48.354 | 31.420 | 34.261 | 32.992 | 31.496 | 10.549 | 10.836 | NA     | NA     | NA | NA |
| 460 | L | 5.503  | 5.251  | 48.111 | 47.351 | 32.798 | 31.152 | 33.313 | 30.891 | 49.242 | 49.015 | 35.653 | 30.983 | NA     | NA     | 10.520 | 9.803  | 23.508 | 22.164 | NA | NA |
| 461 | R | 10.977 | 10.466 | 47.240 | 45.700 | 32.162 | 30.292 | 38.847 | 38.725 | 42.367 | 42.547 | 28.522 | 30.297 | 34.626 | 35.136 | NA     | NA     | 21.687 | 22.916 | NA | NA |

|     |   |        |        |        |        |        |        |        |        |        |        |        |        |        |        |        |        |        |        |    |    |
|-----|---|--------|--------|--------|--------|--------|--------|--------|--------|--------|--------|--------|--------|--------|--------|--------|--------|--------|--------|----|----|
| 461 | L | 7.532  | 7.629  | 49.291 | 48.676 | 30.009 | 28.735 | 39.046 | 37.913 | 42.774 | 45.466 | 36.263 | 29.238 | 35.002 | 35.632 | 15.698 | 15.494 | NA     | NA     | NA | NA |
| 462 | R | 5.773  | 3.446  | 48.747 | 46.669 | 30.804 | 33.884 | 36.956 | 37.858 | 44.143 | 45.762 | 35.836 | 32.256 | 30.143 | 29.152 | NA     | NA     | 13.452 | 15.508 | NA | NA |
| 462 | L | 2.472  | 2.551  | 48.336 | 48.346 | NA     | NA     | 38.878 | 40.108 | 41.273 | 40.845 | 34.922 | 29.463 | 29.252 | 29.759 | 10.412 | 10.768 | 16.912 | 17.820 | NA | NA |
| 463 | R | 9.972  | 11.498 | 47.038 | 49.445 | 29.192 | 28.179 | 33.431 | 35.183 | 47.377 | 50.103 | 35.701 | 41.086 | 30.806 | 32.133 | 16.889 | 16.829 | 23.007 | 23.735 | NA | NA |
| 463 | L | 9.644  | 9.216  | 49.143 | 48.539 | 29.244 | 31.647 | NA     | NA     | 43.729 | 38.959 | 37.060 | 30.157 | 31.884 | 31.524 | 11.235 | 11.672 | 22.692 | 26.377 | NA | NA |
| 464 | R | 7.916  | 7.364  | 47.524 | 47.016 | NA     | NA     | NA     | NA     | 45.591 | 45.591 | 35.240 | 35.025 | 28.355 | 27.085 | 10.223 | 10.136 | NA     | NA     | NA | NA |
| 464 | L | 8.185  | 8.578  | 47.827 | 43.652 | 29.437 | 28.604 | 44.853 | 46.807 | 41.732 | 41.732 | NA     | NA     | 29.316 | 28.394 | NA     | NA     | 22.019 | 23.535 | NA | NA |
| 466 | R | 7.527  | 6.988  | 42.279 | 38.493 | 28.196 | 27.708 | 38.410 | 37.675 | 46.320 | 40.741 | 37.113 | 39.227 | 31.527 | 31.254 | 14.803 | 15.205 | 19.507 | 19.246 | NA | NA |
| 466 | L | 10.121 | 9.196  | 42.465 | 43.960 | 27.427 | 28.760 | 40.080 | 39.899 | 43.128 | 46.176 | 41.143 | 37.009 | 31.122 | 31.476 | 11.193 | 10.393 | 24.888 | 25.212 | NA | NA |
| 467 | R | 8.240  | 8.928  | 52.200 | 55.644 | 27.407 | 28.997 | 40.674 | 32.596 | 46.377 | 48.661 | 39.736 | 37.803 | 31.822 | 31.238 | 16.443 | 16.793 | 21.120 | 20.257 | NA | NA |
| 467 | L | 8.140  | 7.192  | 56.371 | 56.816 | 30.032 | 30.486 | 40.382 | 40.085 | 43.710 | 41.687 | 34.730 | 30.178 | 31.204 | 31.770 | NA     | NA     | 16.246 | 15.638 | NA | NA |
| 469 | R | 8.620  | 8.138  | 39.167 | 39.853 | 25.438 | 25.567 | 38.774 | 36.963 | 43.719 | 43.719 | 36.495 | 36.922 | 28.545 | 27.999 | 17.849 | 16.373 | 21.830 | 21.998 | NA | NA |
| 469 | L | 8.321  | 7.078  | 40.084 | 40.995 | 30.206 | 30.062 | 35.550 | 40.986 | 35.586 | 35.586 | 38.300 | 38.195 | 28.784 | 28.979 | 16.104 | 15.539 | NA     | NA     | NA | NA |
| 470 | R | 10.678 | 10.465 | 46.729 | 48.297 | 29.309 | 29.191 | 32.447 | 31.091 | 58.301 | 49.946 | 38.756 | 40.863 | 30.695 | 32.143 | 12.889 | 11.115 | 24.705 | 25.774 | NA | NA |
| 470 | L | 9.276  | 10.036 | 49.901 | 48.899 | 28.139 | 30.589 | 38.813 | 36.307 | NA     | NA     | 41.754 | 36.929 | 27.939 | 29.056 | 13.218 | 12.181 | 25.225 | 22.517 | NA | NA |
| 471 | R | 6.309  | 5.545  | 49.886 | 51.913 | 29.612 | 27.697 | NA     | NA     | 54.624 | 46.569 | 41.777 | 43.557 | NA     | NA     | 13.517 | 12.804 | NA     | NA     | NA | NA |
| 471 | L | 5.233  | 5.481  | NA     | NA     | 26.811 | 26.404 | 33.923 | 32.611 | 45.397 | 47.482 | 46.086 | 39.810 | 31.981 | 31.250 | 14.064 | 12.788 | 20.471 | 20.699 | NA | NA |
| 472 | L | 9.978  | 5.802  | 43.049 | 44.160 | 26.369 | 25.442 | 34.023 | 35.788 | NA     | NA     | 37.193 | 40.848 | 31.637 | 31.386 | 15.845 | 16.796 | 18.285 | 17.950 | NA | NA |
| 473 | R | 7.675  | 8.192  | 47.466 | 47.229 | 26.438 | 25.708 | 43.610 | 43.013 | 45.789 | 43.451 | 32.369 | 31.460 | 31.106 | 30.805 | NA     | NA     | 24.996 | 25.108 | NA | NA |
| 474 | R | 10.024 | 10.111 | 51.139 | 50.596 | 27.934 | 28.253 | 35.768 | 36.353 | NA     | NA     | 41.071 | 41.384 | NA     | NA     | 12.934 | 13.823 | 19.350 | 16.922 | NA | NA |
| 474 | L | 7.767  | 7.442  | 52.089 | 51.676 | 28.022 | 27.903 | 37.305 | 37.722 | 47.618 | 48.037 | 38.035 | 38.578 | 30.407 | 31.308 | 14.396 | 14.275 | 23.381 | 22.533 | NA | NA |
| 475 | R | 7.666  | 8.411  | 46.888 | 46.069 | 30.313 | 30.839 | 45.617 | 43.333 | 44.834 | 47.604 | NA     | NA     | 30.079 | 29.548 | 10.294 | 10.238 | NA     | NA     | NA | NA |
| 475 | L | 7.063  | 6.602  | 51.642 | 50.093 | 30.480 | 30.321 | 41.702 | 41.182 | 46.146 | 45.540 | 36.499 | 34.765 | NA     | NA     | 9.474  | 10.825 | 16.691 | 17.773 | NA | NA |
| 476 | R | 6.853  | 5.079  | 48.176 | 45.915 | 25.834 | 24.284 | 37.487 | 38.731 | 44.461 | 43.714 | 35.142 | 38.152 | 26.244 | 26.818 | 20.135 | 19.607 | 21.665 | 22.625 | NA | NA |
| 476 | L | 6.564  | 7.164  | 46.888 | 48.008 | 24.717 | 25.834 | 39.341 | 39.153 | 41.907 | 40.701 | 36.179 | 31.723 | NA     | NA     | 9.967  | 10.318 | NA     | NA     | NA | NA |
| 477 | R | 2.706  | 3.236  | 49.117 | 47.217 | 28.645 | 28.506 | 36.408 | 33.322 | 46.199 | 48.588 | 36.625 | 38.646 | 30.324 | 30.529 | NA     | NA     | NA     | NA     | NA | NA |
| 477 | L | 1.022  | 1.402  | 47.787 | 47.234 | 28.326 | 27.888 | 37.367 | 39.420 | 47.000 | 47.870 | 34.813 | 37.589 | 32.153 | 31.537 | 8.430  | 8.833  | 23.111 | 22.245 | NA | NA |
| 478 | R | 6.787  | 3.290  | 47.994 | 47.364 | 26.109 | 27.465 | 35.972 | 38.018 | 53.785 | 51.214 | 36.326 | 39.235 | 28.617 | 29.022 | NA     | NA     | NA     | NA     | NA | NA |
| 478 | L | 10.214 | 1.475  | NA     | NA     | NA     | NA     | 41.981 | 38.513 | 45.174 | 46.568 | 41.106 | 43.242 | 27.964 | 27.510 | 10.436 | 11.188 | 14.350 | 13.233 | NA | NA |
| 479 | R | 10.003 | 10.166 | 41.928 | 40.668 | 27.828 | 28.528 | 38.982 | 37.924 | 41.329 | 47.553 | 35.411 | 37.264 | 26.343 | 26.117 | 11.419 | 12.518 | 19.063 | 19.650 | NA | NA |
| 479 | L | 9.026  | 10.979 | 46.431 | 43.924 | 28.219 | 29.495 | 39.769 | 37.854 | 42.095 | 44.165 | 33.594 | 35.694 | 26.745 | 27.084 | 9.864  | 8.965  | 21.055 | 11.332 | NA | NA |



|     |   |        |        |        |        |        |        |        |        |        |        |        |        |        |        |        |        |        |        |    |    |
|-----|---|--------|--------|--------|--------|--------|--------|--------|--------|--------|--------|--------|--------|--------|--------|--------|--------|--------|--------|----|----|
| 482 | R | 7.067  | 7.592  | 47.155 | 46.081 | 28.403 | 28.003 | NA     | NA     | 41.527 | 43.869 | NA     | NA     | 32.554 | 33.498 | 10.818 | 10.685 | 18.827 | 18.474 | NA | NA |
| 482 | L | 2.173  | 2.090  | 43.731 | 43.996 | 28.899 | 28.819 | 38.450 | 36.946 | 44.705 | 45.567 | 39.795 | 42.189 | 33.058 | 32.064 | 14.952 | 16.450 | 28.278 | 28.329 | NA | NA |
| 483 | L | 13.547 | 12.774 | 54.185 | 55.188 | 28.171 | 29.799 | 45.759 | 38.524 | 47.945 | 45.777 | 39.502 | 36.055 | 29.605 | 30.067 | 15.343 | 15.130 | 12.241 | 12.272 | NA | NA |
| 489 | R | 8.764  | 6.831  | NA     | NA     | NA     | NA     | 37.115 | 38.388 | NA     | NA     | 27.225 | 33.183 | NA     | NA     | 11.401 | 11.998 | 21.335 | 21.102 | NA | NA |
| 489 | L | 5.146  | 4.438  | 48.061 | 47.926 | 28.838 | 28.855 | 39.461 | 39.080 | NA     | NA     | 35.209 | 30.105 | 32.110 | 31.932 | 12.612 | 10.988 | NA     | NA     | NA | NA |
| 490 | R | 6.159  | 6.206  | 49.061 | 48.396 | 29.022 | 28.703 | 37.448 | 39.200 | NA     | NA     | 31.108 | 30.117 | 30.950 | 30.757 | 14.453 | 13.610 | 19.857 | 19.531 | NA | NA |
| 490 | L | 8.920  | 9.554  | 47.812 | 50.386 | 30.238 | 29.742 | 38.936 | 36.244 | NA     | NA     | 31.783 | 35.127 | NA     | NA     | 13.325 | 13.132 | 13.703 | 13.064 | NA | NA |
| 492 | R | 12.409 | 12.673 | 50.476 | 46.677 | 31.025 | 30.702 | 32.008 | 39.203 | NA     | NA     | 34.563 | 34.563 | 27.611 | 28.371 | 17.153 | 17.010 | NA     | NA     | NA | NA |
| 492 | L | 7.484  | 8.037  | 50.316 | 49.240 | 31.850 | 32.460 | 34.678 | 36.554 | NA     | NA     | 34.136 | 34.136 | NA     | NA     | 17.661 | 16.508 | 29.268 | 27.627 | NA | NA |
| 493 | R | 11.069 | 11.552 | 45.454 | 44.911 | 29.867 | 31.093 | 31.934 | 31.934 | NA     | NA     | 28.360 | 31.869 | 28.347 | 28.972 | NA     | NA     | 12.697 | 12.953 | NA | NA |
| 493 | L | 11.420 | 11.923 | 43.407 | 44.222 | 31.159 | 32.513 | 36.022 | 36.022 | NA     | NA     | 29.986 | 34.354 | NA     | NA     | 9.656  | 9.898  | 16.435 | 21.876 | NA | NA |
| 494 | R | 6.445  | 6.997  | 44.678 | 45.063 | 29.066 | 28.749 | NA     | NA     | NA     | NA     | 30.043 | 30.043 | 31.135 | 30.564 | 7.537  | 8.313  | 19.507 | 17.719 | NA | NA |
| 495 | R | 9.296  | 8.357  | 53.090 | 53.232 | 32.134 | 33.024 | 33.986 | 34.244 | NA     | NA     | 36.192 | 39.077 | 31.481 | 31.516 | 15.911 | 16.110 | 18.143 | 21.504 | NA | NA |
| 495 | L | 7.270  | 6.175  | 52.570 | 53.599 | 31.984 | 32.061 | 30.653 | 38.566 | NA     | NA     | NA     | NA     | 30.299 | 30.890 | 16.085 | 14.387 | NA     | NA     | NA | NA |
| 495 | L | 7.270  | 6.175  | 52.570 | 53.599 | 31.984 | 32.061 | 30.653 | 38.566 | NA     | NA     | NA     | NA     | 30.299 | 30.890 | 16.085 | 14.387 | NA     | NA     | NA | NA |
| 496 | R | 10.845 | 9.894  | 47.886 | 46.610 | 31.965 | 31.742 | 35.546 | 42.495 | NA     | NA     | 34.972 | 36.830 | 29.755 | 29.393 | 20.456 | 12.420 | NA     | NA     | NA | NA |
| 496 | L | 8.324  | 9.036  | NA     | NA     | 32.878 | 32.851 | 33.013 | 38.874 | NA     | NA     | NA     | NA     | NA     | NA     | 13.847 | 14.098 | 20.935 | 20.958 | NA | NA |
| 497 | R | 7.841  | 9.057  | 47.646 | 47.115 | 28.972 | 29.827 | 37.327 | 42.178 | NA     | NA     | NA     | NA     | 30.489 | 29.780 | 10.508 | 9.985  | 26.235 | 27.506 | NA | NA |
| 497 | L | 4.890  | 5.113  | NA     | NA     | 30.821 | 30.987 | 38.439 | 39.173 | NA     | NA     | 33.120 | 35.066 | 27.354 | 27.686 | NA     | NA     | 29.067 | 22.884 | NA | NA |
| 498 | R | 8.188  | 8.477  | 48.512 | 49.206 | 31.878 | 31.312 | 35.886 | 37.233 | NA     | NA     | NA     | NA     | 29.114 | 28.949 | 16.103 | 14.193 | 21.898 | 21.935 | NA | NA |
| 498 | L | 8.356  | 9.947  | 47.405 | 50.191 | 32.384 | 32.316 | NA     | NA     | NA     | NA     | NA     | NA     | 27.485 | 27.242 | NA     | NA     | 13.461 | 13.490 | NA | NA |
| 499 | R | 3.699  | 3.180  | 47.941 | 48.466 | 31.503 | 31.972 | 32.142 | 32.142 | NA     | NA     | NA     | NA     | 29.640 | 29.507 | 9.034  | 10.148 | 21.901 | 23.358 | NA | NA |
| 500 | R | 6.463  | 5.813  | 50.915 | 52.248 | 24.747 | 23.571 | 34.031 | 36.811 | NA     | NA     | NA     | NA     | 30.047 | 30.157 | 18.876 | 18.134 | NA     | NA     | NA | NA |
| 501 | R | 12.446 | 13.611 | 49.816 | 50.562 | 29.005 | 28.212 | 35.937 | 40.560 | NA     | NA     | NA     | NA     | 30.780 | 30.897 | 15.348 | 16.514 | 23.806 | 13.750 | NA | NA |
| 501 | L | 11.014 | 10.316 | 47.572 | 46.087 | 30.145 | 21.128 | 38.894 | 39.162 | NA     | NA     | NA     | NA     | NA     | NA     | 20.795 | 18.696 | 25.713 | 24.169 | NA | NA |
| 502 | R | 10.396 | 9.929  | 47.304 | 48.716 | 29.386 | 31.960 | 34.755 | 32.418 | NA     | NA     | NA     | NA     | 28.353 | 28.269 | 9.083  | 9.992  | NA     | NA     | NA | NA |
| 502 | L | 9.939  | 10.405 | NA     | NA     | 30.777 | 29.965 | 37.959 | 41.361 | NA     | NA     | NA     | NA     | 28.892 | 29.235 | NA     | NA     | 13.256 | 13.779 | NA | NA |
| 503 | L | 9.815  | 9.930  | 48.254 | 45.774 | 34.636 | 32.822 | 34.834 | 39.425 | NA     | NA     | NA     | NA     | 27.403 | 26.551 | NA     | NA     | NA     | NA     | NA | NA |
| 503 | R | 2.624  | 4.819  | 44.335 | 45.903 | 31.729 | 35.349 | NA     | NA     | NA     | NA     | NA     | NA     | 26.800 | 26.635 | 13.462 | 13.890 | 6.702  | 15.197 | NA | NA |
| 503 | R | 2.225  | 3.435  | 44.335 | 45.903 | 31.729 | 35.349 | NA     | NA     | NA     | NA     | NA     | NA     | 26.800 | 26.635 | 13.462 | 13.890 | 6.702  | 15.197 | NA | NA |
| 503 | L | 9.898  | 9.608  | 48.254 | 45.774 | 34.636 | 32.822 | 34.834 | 39.425 | NA     | NA     | NA     | NA     | 27.403 | 26.551 | NA     | NA     | NA     | NA     | NA | NA |

|     |   |        |        |        |        |        |        |        |        |    |    |    |    |        |        |        |        |        |        |    |    |
|-----|---|--------|--------|--------|--------|--------|--------|--------|--------|----|----|----|----|--------|--------|--------|--------|--------|--------|----|----|
| 504 | R | 2.171  | 3.111  | NA     | NA     | 31.424 | 29.710 | NA     | NA     | NA | NA | NA | NA | 29.974 | 28.491 | 6.013  | 5.721  | 11.176 | 12.813 | NA | NA |
| 504 | L | 5.793  | 5.734  | 52.233 | 51.353 | 29.449 | 30.564 | 45.695 | 46.427 | NA | NA | NA | NA | 28.667 | 28.648 | NA     | NA     | NA     | NA     | NA | NA |
| 505 | R | 6.714  | 7.624  | 49.773 | 50.474 | 25.828 | 25.927 | 30.847 | 34.097 | NA | NA | NA | NA | NA     | NA     | 20.414 | 20.992 | 17.192 | 18.247 | NA | NA |
| 506 | R | 8.497  | 8.502  | NA     | NA     | NA     | NA     | 37.580 | 40.979 | NA | NA | NA | NA | 31.028 | 31.206 | 10.859 | 11.091 | 13.690 | 14.667 | NA | NA |
| 506 | L | 8.103  | 7.834  | 49.533 | 47.758 | 28.209 | 25.725 | 36.708 | 40.984 | NA | NA | NA | NA | 32.207 | 31.270 | NA     | NA     | 24.203 | 24.930 | NA | NA |
| 508 | R | 9.303  | 12.753 | 48.754 | 45.422 | 23.198 | 20.915 | 28.431 | 35.014 | NA | NA | NA | NA | 30.888 | 31.615 | 10.138 | 13.637 | 10.444 | 10.547 | NA | NA |
| 508 | L | 8.934  | 8.463  | NA     | NA     | 20.909 | 20.803 | 32.162 | 39.989 | NA | NA | NA | NA | 32.327 | 32.732 | NA     | NA     | NA     | NA     | NA | NA |
| 509 | L | 4.209  | 4.895  | 46.431 | 48.824 | 25.880 | 26.693 | 33.471 | 33.471 | NA | NA | NA | NA | 32.544 | 32.244 | 10.683 | 10.688 | 12.874 | 10.969 | NA | NA |
| 510 | R | 6.752  | 7.050  | NA     | NA     | 24.768 | 27.804 | 39.092 | 39.111 | NA | NA | NA | NA | 29.220 | 29.249 | 5.530  | 5.528  | 12.713 | 11.231 | NA | NA |
| 511 | L | 7.359  | 5.372  | NA     | NA     | 29.695 | 28.671 | 38.168 | 44.033 | NA | NA | NA | NA | NA     | NA     | 11.208 | 10.564 | 15.934 | 15.157 | NA | NA |
| 512 | R | 1.816  | 1.669  | 45.840 | 45.883 | 26.984 | 28.459 | 40.429 | 42.347 | NA | NA | NA | NA | 31.359 | 31.222 | 9.296  | 9.925  | 12.539 | 13.223 | NA | NA |
| 512 | L | 5.532  | 6.618  | NA     | NA     | NA     | NA     | 42.074 | 41.459 | NA | NA | NA | NA | 33.650 | 34.870 | 9.726  | 10.043 | 16.604 | 16.028 | NA | NA |
| 513 | R | 4.780  | 4.330  | 46.512 | 46.675 | 30.770 | 27.337 | NA     | NA     | NA | NA | NA | NA | 31.849 | 31.050 | 15.629 | 14.705 | 14.098 | 14.143 | NA | NA |
| 514 | R | 8.743  | 9.924  | 52.084 | 52.175 | 32.035 | 28.353 | NA     | NA     | NA | NA | NA | NA | 31.477 | 31.115 | 20.423 | 19.935 | 14.996 | 14.837 | NA | NA |
| 514 | L | 12.697 | 12.065 | NA     | NA     | 31.826 | 30.929 | NA     | NA     | NA | NA | NA | NA | 29.541 | 28.224 | 9.148  | 9.527  | 17.230 | 18.098 | NA | NA |
| 515 | R | 7.962  | 8.707  | 47.407 | 47.878 | 29.897 | 27.945 | NA     | NA     | NA | NA | NA | NA | 29.048 | 28.042 | 9.303  | 9.731  | 12.500 | 12.679 | NA | NA |
| 515 | L | 6.907  | 6.262  | 47.375 | 47.885 | 30.743 | 30.756 | NA     | NA     | NA | NA | NA | NA | 29.902 | 30.136 | 11.823 | 13.452 | NA     | NA     | NA | NA |
| 516 | R | 11.416 | 12.312 | 49.422 | 47.188 | 27.724 | 30.497 | NA     | NA     | NA | NA | NA | NA | 29.654 | 29.072 | 6.108  | 7.818  | 17.798 | 21.045 | NA | NA |
| 516 | L | 6.663  | 7.368  | 48.646 | 49.581 | 30.576 | 30.578 | NA     | NA     | NA | NA | NA | NA | 28.214 | 27.620 | NA     | NA     | NA     | NA     | NA | NA |
| 517 | R | 5.298  | 4.502  | 49.820 | 49.360 | 27.283 | 27.837 | NA     | NA     | NA | NA | NA | NA | 33.300 | 32.000 | NA     | NA     | 12.117 | 9.902  | NA | NA |
| 518 | R | 9.977  | 10.434 | 49.181 | 48.612 | 25.387 | 26.483 | NA     | NA     | NA | NA | NA | NA | 31.389 | 31.205 | 15.431 | 15.158 | 19.503 | 21.129 | NA | NA |
| 519 | R | 1.629  | 2.213  | 50.169 | 49.838 | NA     | NA     | NA     | NA     | NA | NA | NA | NA | 28.606 | 28.080 | NA     | NA     | 17.196 | 17.466 | NA | NA |
| 520 | R | 1.008  | 2.602  | 48.179 | 48.013 | 28.890 | 30.418 | NA     | NA     | NA | NA | NA | NA | 28.747 | 28.657 | 15.227 | 14.657 | NA     | NA     | NA | NA |
| 521 | R | 10.895 | 10.542 | 50.648 | 51.417 | 29.681 | 30.416 | NA     | NA     | NA | NA | NA | NA | 30.362 | 30.183 | 18.153 | 17.647 | NA     | NA     | NA | NA |
| 523 | R | 8.612  | 9.407  | NA     | NA     | 27.845 | 28.125 | NA     | NA     | NA | NA | NA | NA | NA     | NA     | 11.411 | 10.357 | 11.887 | 13.881 | NA | NA |
| 524 | R | 8.355  | 8.910  | 48.479 | 48.607 | 30.862 | 29.059 | NA     | NA     | NA | NA | NA | NA | 33.766 | 34.551 | 13.586 | 14.075 | 8.500  | 11.996 | NA | NA |
| 526 | R | 13.505 | 13.800 | 53.056 | 53.627 | 24.165 | 25.570 | NA     | NA     | NA | NA | NA | NA | 30.723 | 31.358 | 10.864 | 11.687 | NA     | NA     | NA | NA |
| 527 | R | 9.865  | 10.359 | 44.286 | 43.790 | NA     | NA     | NA     | NA     | NA | NA | NA | NA | 26.429 | 26.540 | 17.431 | 13.960 | 10.588 | 11.337 | NA | NA |
| 529 | R | 4.901  | 5.193  | 49.896 | 49.564 | 27.569 | 27.645 | NA     | NA     | NA | NA | NA | NA | 25.708 | 26.098 | 11.808 | 12.187 | NA     | NA     | NA | NA |
| 530 | R | 8.771  | 7.256  | 48.548 | 47.332 | 29.751 | 30.751 | NA     | NA     | NA | NA | NA | NA | 27.671 | 27.692 | 20.104 | 18.890 | 18.101 | 17.450 | NA | NA |
| 532 | R | 8.449  | 9.130  | 49.876 | 50.156 | NA     | NA     | NA     | NA     | NA | NA | NA | NA | 33.805 | 33.787 | 15.291 | 13.282 | 6.229  | 14.597 | NA | NA |

|     |   |        |        |        |        |        |        |    |    |    |    |    |    |        |        |        |        |        |        |    |    |
|-----|---|--------|--------|--------|--------|--------|--------|----|----|----|----|----|----|--------|--------|--------|--------|--------|--------|----|----|
| 533 | R | 11.260 | 11.974 | NA     | NA     | 28.576 | 28.509 | NA | NA | NA | NA | NA | NA | 29.650 | 29.108 | 8.013  | 8.242  | 9.266  | 9.711  | NA | NA |
| 534 | R | 5.352  | 3.868  | 48.916 | 49.344 | 30.603 | 29.716 | NA | NA | NA | NA | NA | NA | 32.422 | 32.154 | 13.754 | 12.751 | NA     | NA     | NA | NA |
| 537 | R | 8.087  | 8.393  | 50.880 | 48.510 | 29.444 | 29.508 | NA | NA | NA | NA | NA | NA | 28.524 | 28.196 | NA     | NA     | 10.324 | 11.771 | NA | NA |
| 538 | R | 4.283  | 3.384  | NA     | NA     | NA     | NA     | NA | NA | NA | NA | NA | NA | 30.093 | 30.712 | NA     | NA     | 11.908 | 13.044 | NA | NA |
| 539 | R | 9.305  | 8.167  | 51.086 | 51.069 | 27.128 | 28.433 | NA | NA | NA | NA | NA | NA | 37.216 | 36.535 | NA     | NA     | 6.452  | 9.047  | NA | NA |
| 539 | L | 7.059  | 8.503  | 50.190 | 49.140 | 27.749 | 26.948 | NA | NA | NA | NA | NA | NA | 33.565 | 33.833 | 14.184 | 16.508 | 5.498  | 12.529 | NA | NA |
| 540 | R | 7.417  | 7.826  | 42.670 | 42.601 | 26.082 | 27.422 | NA | NA | NA | NA | NA | NA | 27.687 | 27.845 | 11.822 | 9.475  | 9.055  | 9.358  | NA | NA |
| 540 | L | 5.533  | 5.495  | 46.356 | 47.234 | 30.395 | 30.123 | NA | NA | NA | NA | NA | NA | 27.355 | 26.518 | 17.372 | 16.419 | NA     | NA     | NA | NA |
| 541 | L | 9.598  | 7.200  | 44.788 | 47.777 | 29.171 | 28.435 | NA | NA | NA | NA | NA | NA | 30.219 | 29.820 | 14.253 | 14.752 | 22.165 | 21.152 | NA | NA |
| 542 | R | 6.852  | 7.367  | 50.474 | 52.795 | 26.118 | 26.002 | NA | NA | NA | NA | NA | NA | 30.989 | 31.297 | 20.554 | 21.045 | 14.092 | 13.894 | NA | NA |
| 543 | R | 3.285  | 3.248  | 48.188 | 49.285 | 34.452 | 34.125 | NA | NA | NA | NA | NA | NA | 28.955 | 28.731 | 20.987 | 18.988 | NA     | NA     | NA | NA |
| 543 | L | 5.316  | 5.439  | 46.014 | 47.134 | 31.128 | 33.076 | NA | NA | NA | NA | NA | NA | 26.129 | 27.266 | 14.522 | 16.244 | 13.077 | 13.160 | NA | NA |
| 544 | R | 9.522  | 9.212  | 51.763 | 53.718 | 30.600 | 31.285 | NA | NA | NA | NA | NA | NA | 30.813 | 29.720 | 12.373 | 12.264 | 8.258  | 9.518  | NA | NA |
| 544 | L | 8.582  | 8.281  | 48.815 | 50.510 | 30.936 | 29.063 | NA     | NA     | 11.768 | 11.729 | 14.986 | 17.212 | NA | NA |
| 545 | R | 5.995  | 6.137  | 52.402 | 50.531 | 31.591 | 32.080 | NA | NA | NA | NA | NA | NA | 30.543 | 30.721 | 13.306 | 12.559 | 11.740 | 15.134 | NA | NA |
| 545 | L | 10.266 | 10.573 | 52.937 | 49.743 | 27.870 | 28.611 | NA | NA | NA | NA | NA | NA | 30.489 | 30.896 | 12.146 | 12.746 | 6.123  | 6.476  | NA | NA |
| 546 | R | 7.137  | 7.164  | 46.514 | 45.752 | 32.258 | 33.484 | NA | NA | NA | NA | NA | NA | 28.634 | 29.053 | 11.311 | 13.494 | 7.230  | 7.230  | NA | NA |
| 546 | L | 6.783  | 7.240  | NA     | NA     | 31.040 | 30.367 | NA | NA | NA | NA | NA | NA | 27.825 | 27.213 | 12.768 | 12.914 | 6.170  | 6.170  | NA | NA |
| 547 | R | 3.358  | 3.678  | 45.241 | 45.772 | 32.239 | 32.598 | NA | NA | NA | NA | NA | NA | 29.836 | 28.887 | 15.462 | 14.072 | 11.508 | 11.791 | NA | NA |
| 547 | L | 2.939  | 2.551  | 49.790 | 45.799 | 32.255 | 31.364 | NA     | NA     | 9.433  | 9.017  | NA     | NA     | NA | NA |
| 549 | R | 7.530  | 8.982  | 50.672 | 50.660 | NA     | NA     | NA | NA | NA | NA | NA | NA | 30.702 | 29.424 | 11.859 | 13.065 | 6.156  | 8.431  | NA | NA |
| 550 | R | 9.216  | 9.268  | 51.691 | 52.587 | 28.674 | 27.809 | NA | NA | NA | NA | NA | NA | 34.634 | 34.138 | 15.987 | 15.748 | 10.262 | 16.303 | NA | NA |
| 550 | L | 10.757 | 11.099 | NA     | NA     | 30.933 | 30.904 | NA | NA | NA | NA | NA | NA | 31.365 | 31.848 | 12.673 | 12.802 | 12.589 | 12.217 | NA | NA |
| 551 | R | 10.998 | 11.235 | 47.894 | 46.074 | 29.882 | 30.157 | NA | NA | NA | NA | NA | NA | 23.504 | 24.886 | 5.155  | 4.725  | 4.137  | 5.554  | NA | NA |
| 551 | L | 10.576 | 10.998 | NA     | NA     | 29.467 | 29.678 | NA | NA | NA | NA | NA | NA | 27.983 | 28.085 | 4.609  | 4.957  | 13.293 | 13.680 | NA | NA |
| 552 | R | 17.556 | 18.237 | 48.706 | 50.278 | 29.166 | 30.155 | NA | NA | NA | NA | NA | NA | 25.447 | 26.044 | 14.417 | 13.503 | NA     | NA     | NA | NA |
| 552 | L | 12.900 | 10.361 | 43.927 | 44.545 | 32.660 | 31.020 | NA | NA | NA | NA | NA | NA | 26.112 | 23.070 | 12.834 | 13.631 | NA     | NA     | NA | NA |
| 553 | R | 9.363  | 8.518  | 50.119 | 48.194 | 26.496 | 25.776 | NA | NA | NA | NA | NA | NA | 29.518 | 29.847 | 10.343 | 9.548  | NA     | NA     | NA | NA |
| 553 | L | 4.801  | 4.030  | 47.943 | 48.564 | NA     | NA     | NA | NA | NA | NA | NA | NA | NA     | NA     | 16.202 | 14.891 | NA     | NA     | NA | NA |
| 554 | R | 9.350  | 9.200  | 46.130 | 45.884 | 26.812 | 26.345 | NA | NA | NA | NA | NA | NA | 29.824 | 30.466 | NA     | NA     | NA     | NA     | NA | NA |
| 554 | L | 11.072 | 9.655  | 46.181 | 47.163 | 27.805 | 27.852 | NA     | NA     | 4.017  | 4.658  | NA     | NA     | NA | NA |

|     |   |        |        |        |        |        |        |    |    |    |    |    |    |        |        |        |        |    |    |    |    |
|-----|---|--------|--------|--------|--------|--------|--------|----|----|----|----|----|----|--------|--------|--------|--------|----|----|----|----|
| 555 | R | 10.646 | 9.813  | 47.970 | 49.678 | 25.490 | 23.877 | NA | NA | NA | NA | NA | NA | 27.952 | 29.822 | 13.624 | 12.765 | NA | NA | NA | NA |
| 555 | L | 11.508 | 10.950 | 48.697 | 50.328 | 27.843 | 24.724 | NA | NA | NA | NA | NA | NA | 30.463 | 30.826 | 10.907 | 9.245  | NA | NA | NA | NA |
| 557 | L | 6.029  | 8.247  | NA     | NA     | NA     | NA     | NA | NA | NA | NA | NA | NA | 27.756 | 27.958 | 13.036 | 12.010 | NA | NA | NA | NA |
| 558 | R | 10.865 | 10.442 | NA     | NA     | 29.179 | 29.285 | NA | NA | NA | NA | NA | NA | 31.936 | 32.550 | 16.384 | 12.416 | NA | NA | NA | NA |
| 558 | L | 9.265  | 7.291  | 46.750 | 45.103 | 31.399 | 31.277 | NA | NA | NA | NA | NA | NA | 28.597 | 29.900 | 7.183  | 6.922  | NA | NA | NA | NA |
| 559 | R | 8.845  | 8.128  | 51.144 | 51.230 | 34.975 | 31.823 | NA | NA | NA | NA | NA | NA | 28.990 | 28.699 | 4.434  | 4.215  | NA | NA | NA | NA |
| 559 | L | 8.037  | 7.341  | 50.103 | 51.627 | NA     | NA     | NA | NA | NA | NA | NA | NA | 27.954 | 29.194 | 13.492 | 11.885 | NA | NA | NA | NA |
| 560 | R | 4.696  | 5.142  | 48.025 | 47.557 | NA     | NA     | NA | NA | NA | NA | NA | NA | 29.432 | 28.168 | 10.665 | 11.029 | NA | NA | NA | NA |
| 560 | L | 7.727  | 8.147  | 44.606 | 45.547 | 30.904 | 30.701 | NA | NA | NA | NA | NA | NA | 30.470 | 29.019 | 10.350 | 9.865  | NA | NA | NA | NA |
| 561 | R | 9.573  | 7.756  | 47.826 | 48.254 | 27.736 | 31.748 | NA | NA | NA | NA | NA | NA | 29.946 | 29.907 | NA     | NA     | NA | NA | NA | NA |
| 561 | L | 11.098 | 10.337 | 45.236 | 48.188 | NA     | NA     | NA | NA | NA | NA | NA | NA | 25.625 | 26.244 | 11.955 | 15.180 | NA | NA | NA | NA |
| 562 | L | 8.983  | 8.531  | 44.953 | 44.953 | 28.818 | 28.625 | NA | NA | NA | NA | NA | NA | 32.925 | 29.882 | NA     | NA     | NA | NA | NA | NA |
| 563 | R | 8.689  | 8.245  | NA     | NA     | 27.517 | 28.794 | NA | NA | NA | NA | NA | NA | 26.905 | 26.903 | 17.185 | 19.001 | NA | NA | NA | NA |
| 563 | L | 7.196  | 7.504  | 49.045 | 50.872 | 29.857 | 27.789 | NA | NA | NA | NA | NA | NA | 29.882 | 29.968 | 17.965 | 18.206 | NA | NA | NA | NA |
| 564 | R | 6.513  | 7.099  | 46.572 | 46.853 | 33.785 | 33.781 | NA     | NA     | 15.271 | 13.835 | NA | NA | NA | NA |
| 564 | L | 5.571  | 5.609  | 40.418 | 44.508 | 32.213 | 32.570 | NA | NA | NA | NA | NA | NA | 31.458 | 30.825 | 15.194 | 15.357 | NA | NA | NA | NA |
| 565 | R | 11.814 | 10.307 | 51.110 | 48.426 | 27.108 | 26.432 | NA | NA | NA | NA | NA | NA | 28.212 | 27.949 | 13.536 | 14.995 | NA | NA | NA | NA |
| 566 | R | 8.436  | 9.940  | 50.889 | 52.427 | 27.316 | 25.947 | NA | NA | NA | NA | NA | NA | 33.034 | 32.874 | NA     | NA     | NA | NA | NA | NA |
| 566 | L | 6.993  | 5.906  | 52.353 | 50.578 | 32.951 | 34.473 | NA | NA | NA | NA | NA | NA | 30.594 | 29.597 | 12.070 | 13.391 | NA | NA | NA | NA |
| 567 | L | 10.901 | 9.085  | 45.986 | 47.710 | 30.884 | 32.235 | NA | NA | NA | NA | NA | NA | 27.533 | 27.497 | 8.343  | 7.173  | NA | NA | NA | NA |
| 568 | R | 7.224  | 8.328  | 44.978 | 42.918 | 27.665 | 27.806 | NA | NA | NA | NA | NA | NA | 28.117 | 28.923 | 22.343 | 14.469 | NA | NA | NA | NA |
| 568 | L | 12.481 | 12.350 | NA     | NA     | 27.481 | 26.316 | NA     | NA     | 13.195 | 13.476 | NA | NA | NA | NA |
| 569 | R | 11.035 | 9.955  | 46.077 | 44.344 | 28.893 | 29.774 | NA     | NA     | 15.409 | 16.748 | NA | NA | NA | NA |
| 569 | L | 8.943  | 8.984  | 44.725 | 45.914 | NA     | NA     | NA | NA | NA | NA | NA | NA | 27.873 | 28.320 | 17.427 | 19.576 | NA | NA | NA | NA |
| 570 | L | 7.896  | 7.482  | 46.116 | 48.753 | 23.630 | 22.170 | NA | NA | NA | NA | NA | NA | 27.314 | 28.570 | 10.563 | 10.890 | NA | NA | NA | NA |
| 571 | L | 13.384 | 12.563 | 40.997 | 39.636 | 30.063 | 32.655 | NA | NA | NA | NA | NA | NA | 27.474 | 27.365 | 12.960 | 13.731 | NA | NA | NA | NA |
| 573 | R | 11.210 | 11.109 | 46.729 | 47.198 | NA     | NA     | NA | NA | NA | NA | NA | NA | 30.695 | 31.122 | 16.291 | 19.576 | NA | NA | NA | NA |
| 574 | R | 10.081 | 10.056 | NA     | NA     | 28.847 | 30.567 | NA | NA | NA | NA | NA | NA | 27.140 | 26.519 | 10.225 | 7.908  | NA | NA | NA | NA |
| 574 | L | 12.079 | 13.123 | 46.723 | 46.970 | NA     | NA     | NA | NA | NA | NA | NA | NA | 27.686 | 28.236 | 8.538  | 10.567 | NA | NA | NA | NA |
| 576 | R | 10.051 | 8.610  | 47.630 | 45.565 | 30.835 | 27.676 | NA | NA | NA | NA | NA | NA | 24.483 | 23.595 | 14.679 | 14.271 | NA | NA | NA | NA |
| 576 | L | 7.396  | 6.763  | 47.277 | 45.109 | 30.258 | 30.783 | NA | NA | NA | NA | NA | NA | 26.807 | 27.925 | 8.172  | 8.098  | NA | NA | NA | NA |

|     |   |        |        |        |        |         |        |    |    |    |    |    |    |        |        |        |        |    |    |    |    |
|-----|---|--------|--------|--------|--------|---------|--------|----|----|----|----|----|----|--------|--------|--------|--------|----|----|----|----|
| 577 | R | 8.915  | 9.225  | 44.746 | 44.476 | 139.246 | 27.803 | NA | NA | NA | NA | NA | NA | 27.486 | 30.245 | 11.755 | 10.695 | NA | NA | NA | NA |
| 577 | L | 11.645 | 10.857 | 45.786 | 48.593 | 28.357  | 29.414 | NA | NA | NA | NA | NA | NA | 30.495 | 29.270 | 11.016 | 11.549 | NA | NA | NA | NA |
| 578 | R | 7.360  | 7.620  | NA     | NA     | 31.978  | 29.509 | NA | NA | NA | NA | NA | NA | 25.574 | 25.440 | 11.110 | 11.779 | NA | NA | NA | NA |
| 578 | L | 3.947  | 2.761  | 46.128 | 48.050 | 30.326  | 30.120 | NA | NA | NA | NA | NA | NA | 26.703 | 26.110 | 11.741 | 11.783 | NA | NA | NA | NA |
| 579 | R | 7.129  | 7.471  | 47.456 | 47.342 | 26.839  | 26.109 | NA | NA | NA | NA | NA | NA | 27.615 | 29.429 | 19.108 | 19.165 | NA | NA | NA | NA |
| 579 | L | 10.210 | 10.171 | NA     | NA     | 27.131  | 28.827 | NA | NA | NA | NA | NA | NA | 26.492 | 30.151 | 15.005 | 14.312 | NA | NA | NA | NA |
| 580 | R | 10.002 | 8.885  | 45.725 | 45.632 | 26.835  | 27.835 | NA | NA | NA | NA | NA | NA | 25.755 | 25.755 | 16.965 | 17.632 | NA | NA | NA | NA |
| 580 | L | 8.128  | 8.011  | 46.325 | 46.809 | NA      | NA     | NA | NA | NA | NA | NA | NA | 25.843 | 25.843 | 10.077 | 9.452  | NA | NA | NA | NA |
| 581 | R | 2.996  | 2.141  | 49.186 | 48.462 | 32.395  | 28.443 | NA | NA | NA | NA | NA | NA | 25.408 | 26.210 | 16.342 | 13.436 | NA | NA | NA | NA |
| 581 | L | 4.462  | 5.525  | 53.718 | 49.449 | 29.571  | 29.192 | NA | NA | NA | NA | NA | NA | 27.448 | 27.719 | 9.036  | 11.928 | NA | NA | NA | NA |
| 582 | R | 8.384  | 7.583  | 53.657 | 53.366 | 28.992  | 30.399 | NA | NA | NA | NA | NA | NA | 30.006 | 31.644 | 12.168 | 10.580 | NA | NA | NA | NA |
| 582 | L | 5.935  | 5.400  | 51.408 | 51.149 | 31.360  | 34.099 | NA | NA | NA | NA | NA | NA | 28.934 | 29.999 | 10.233 | 10.768 | NA | NA | NA | NA |
| 583 | R | 12.452 | 12.671 | NA     | NA     | 27.202  | 27.515 | NA | NA | NA | NA | NA | NA | 28.355 | 30.767 | 9.853  | 9.480  | NA | NA | NA | NA |
| 583 | L | 1.987  | 1.938  | 47.986 | 50.158 | 28.870  | 29.908 | NA | NA | NA | NA | NA | NA | 30.228 | 29.800 | 11.958 | 12.984 | NA | NA | NA | NA |
| 584 | R | 10.768 | 9.655  | 49.519 | 48.909 | 27.206  | 27.428 | NA     | NA     | 16.001 | 12.304 | NA | NA | NA | NA |
| 584 | L | 9.913  | 10.863 | 48.484 | 47.352 | 26.878  | 25.131 | NA | NA | NA | NA | NA | NA | 29.356 | 30.621 | 13.963 | 16.978 | NA | NA | NA | NA |
| 585 | R | 9.371  | 9.653  | 45.694 | 45.536 | 30.538  | 30.038 | NA | NA | NA | NA | NA | NA | 27.060 | 27.060 | 15.519 | 14.916 | NA | NA | NA | NA |
| 585 | L | 8.935  | 8.535  | 49.365 | 49.964 | 27.869  | 31.283 | NA | NA | NA | NA | NA | NA | 26.187 | 26.187 | 9.969  | 9.082  | NA | NA | NA | NA |
| 587 | R | 10.290 | 9.786  | 47.983 | 47.573 | NA      | NA     | NA | NA | NA | NA | NA | NA | 28.327 | 27.121 | 9.937  | 10.390 | NA | NA | NA | NA |
| 588 | R | 5.060  | 5.249  | 45.618 | 47.297 | 28.236  | 27.726 | NA | NA | NA | NA | NA | NA | 27.009 | 27.796 | 11.024 | 11.272 | NA | NA | NA | NA |
| 588 | L | 7.727  | 8.172  | 48.191 | 47.384 | 30.811  | 27.878 | NA     | NA     | 9.922  | 9.648  | NA | NA | NA | NA |
| 593 | L | 10.806 | 11.913 | 48.663 | 46.970 | 31.130  | 31.517 | NA | NA | NA | NA | NA | NA | 22.734 | 23.979 | 7.256  | 8.928  | NA | NA | NA | NA |
| 593 | R | 5.737  | 6.073  | 52.020 | 48.326 | 33.917  | 32.856 | NA | NA | NA | NA | NA | NA | 25.472 | 26.612 | 9.135  | 9.501  | NA | NA | NA | NA |
| 596 | R | 4.201  | 5.180  | 43.709 | 45.419 | 32.696  | 33.914 | NA | NA | NA | NA | NA | NA | 25.348 | 26.026 | 11.552 | 10.806 | NA | NA | NA | NA |
| 596 | L | 4.759  | 5.486  | NA     | NA     | 37.776  | 35.881 | NA | NA | NA | NA | NA | NA | 26.371 | 26.796 | 16.214 | 16.811 | NA | NA | NA | NA |
| 600 | L | 8.952  | 9.317  | 46.131 | 48.128 | 31.148  | 30.391 | NA     | NA     | 8.688  | 8.688  | NA | NA | NA | NA |
| 600 | R | 11.596 | 12.095 | 47.051 | 49.036 | 32.198  | 33.733 | NA | NA | NA | NA | NA | NA | 26.528 | 28.058 | 9.711  | 9.711  | NA | NA | NA | NA |
| 601 | L | 9.253  | 8.921  | 50.386 | 52.926 | 31.717  | 31.385 | NA     | NA     | 11.309 | 12.530 | NA | NA | NA | NA |
| 601 | R | 10.525 | 10.141 | 50.018 | 50.408 | 30.212  | 29.006 | NA     | NA     | 10.425 | 11.200 | NA | NA | NA | NA |
| 602 | L | 10.121 | 12.073 | 44.985 | 43.618 | 29.295  | 28.058 | NA     | NA     | 11.385 | 12.644 | NA | NA | NA | NA |
| 602 | R | 7.626  | 7.829  | NA     | NA     | NA      | NA     | NA | NA | NA | NA | NA | NA | NA     | NA     | 12.220 | 14.663 | NA | NA | NA | NA |















































|     |   |        |        |        |        |        |        |        |        |        |        |        |        |        |        |        |        |        |        |        |        |
|-----|---|--------|--------|--------|--------|--------|--------|--------|--------|--------|--------|--------|--------|--------|--------|--------|--------|--------|--------|--------|--------|
| 980 | R | 12.359 | 11.002 | NA     |
| 980 | L | 9.970  | 10.636 | NA     |
| 981 | R | 8.944  | 8.021  | NA     |
| 981 | L | 7.623  | 8.199  | NA     |
| 982 | R | 4.842  | 4.036  | NA     |
| 982 | L | 7.647  | 6.593  | NA     |
| 983 | R | 8.224  | 8.192  | NA     |
| 983 | L | 10.040 | 10.337 | NA     |
| 984 | R | 2.900  | 3.037  | NA     |
| 984 | L | 7.740  | 8.694  | NA     |
| 985 | R | 11.438 | 11.834 | NA     |
| 985 | L | 9.562  | 8.733  | NA     |
| 186 | L | NA     | NA     | 47.762 | 48.082 | 28.612 | 30.272 | 40.613 | 40.208 | 56.442 | 59.675 | 31.794 | 33.328 | NA     | NA     | 11.395 | 11.240 | 20.936 | 21.388 | 53.344 | 54.768 |
| 186 | R | NA     | NA     | 47.919 | 48.070 | 17.831 | 26.447 | 39.448 | 41.383 | NA     | NA     | NA     | NA     | 28.180 | 27.478 | 13.550 | 13.646 | NA     | NA     | NA     | NA     |
| 268 | L | NA     | NA     | 44.639 | 45.394 | 28.724 | 27.649 | NA     | NA     | NA     | NA     | NA     | NA     | 28.678 | 28.751 | 8.215  | 10.856 | 13.549 | 14.896 | 63.609 | 61.333 |
| 268 | R | NA     | NA     | 49.754 | 51.684 | 25.201 | 23.450 | 40.955 | 42.025 | 49.158 | 51.391 | 34.986 | 35.379 | 31.518 | 32.255 | NA     | NA     | NA     | NA     | NA     | NA     |
| 355 | L | NA     | NA     | 48.396 | 50.606 | 29.345 | 30.472 | 48.967 | 48.840 | 49.335 | 49.642 | 28.557 | 29.257 | 31.804 | 34.432 | 5.756  | 7.734  | NA     | NA     | 42.775 | 50.100 |
| 355 | R | NA     | NA     | 51.256 | 52.394 | 28.955 | 31.070 | NA     | NA     | NA     | NA     | NA     | NA     | 34.411 | 34.475 | 9.054  | 10.329 | 16.463 | 17.075 | 44.581 | 45.744 |
| 445 | L | NA     | NA     | 48.040 | 47.779 | 25.908 | 27.444 | 44.326 | 44.554 | 34.589 | 35.737 | 30.750 | 31.060 | 30.794 | 30.006 | 10.768 | 10.206 | 15.116 | 15.912 | NA     | NA     |
| 445 | R | NA     | NA     | 45.701 | 44.386 | 26.747 | 27.783 | 42.831 | 42.421 | NA     | NA     | NA     | NA     | 29.173 | 29.915 | 11.452 | 11.745 | 21.319 | 21.101 | NA     | NA     |
| 37  | L | NA     | NA     | 48.828 | 48.058 | 26.133 | 25.298 | 41.125 | 39.648 | 50.861 | 50.274 | 34.261 | 32.297 | 28.410 | 27.882 | 10.709 | 10.767 | 19.639 | 20.434 | 64.865 | 64.666 |
| 37  | R | NA     | NA     | 45.679 | 42.990 | 25.892 | 27.720 | NA     | NA     | 50.180 | 47.216 | 36.810 | 36.638 | 28.479 | 27.791 | NA     | NA     | 24.292 | 24.322 | 64.044 | 68.467 |
| 45  | L | NA     | NA     | 46.840 | 46.620 | 30.781 | 27.945 | NA     | NA     | 48.361 | 48.478 | 45.010 | 45.526 | 28.200 | 27.122 | 8.116  | 9.279  | NA     | NA     | 67.576 | 66.874 |
| 45  | R | NA     | NA     | 45.789 | 47.438 | 27.379 | 29.350 | 41.972 | 42.107 | NA     | 14.365 | 14.776 | NA     | NA     |
| 72  | L | NA     | NA     | 47.448 | 46.370 | 26.938 | 26.290 | 39.409 | 43.245 | 51.888 | 51.898 | NA     | NA     | 26.142 | 26.214 | 11.575 | 12.190 | 23.393 | 25.129 | 61.400 | 62.297 |
| 72  | R | NA     | NA     | 45.859 | 45.882 | 27.987 | 29.640 | NA     | NA     | 51.137 | 54.417 | 40.785 | 40.314 | NA     | NA     | 10.961 | 9.712  | NA     | NA     | 61.606 | 63.319 |
| 100 | L | NA     | NA     | 47.621 | 45.466 | 35.156 | 34.633 | NA     | NA     | 53.713 | 52.876 | 33.720 | 33.093 | 28.433 | 29.814 | 11.589 | 12.128 | NA     | NA     | 60.584 | 59.858 |
| 101 | L | NA     | NA     | 45.953 | 48.167 | 34.141 | 34.565 | NA     | NA     | 54.402 | 55.269 | NA     | NA     | 27.982 | 27.427 | 16.605 | 16.692 | 15.512 | 15.185 | NA     | NA     |
| 101 | R | NA     | NA     | 44.129 | 47.588 | NA     | NA     | 34.952 | 33.445 | NA     | NA     | 39.211 | 39.566 | 29.128 | 29.498 | NA     | NA     | NA     | NA     | 65.041 | 66.079 |
| 103 | L | NA     | NA     | 48.851 | 50.904 | NA     | NA     | 41.197 | 44.248 | 54.883 | 53.039 | 26.474 | 27.224 | 28.090 | 28.326 | NA     | NA     | 21.863 | 21.934 | 60.484 | 59.217 |
| 106 | L | NA     | NA     | 50.532 | 53.024 | 35.888 | 35.114 | NA     | NA     | NA     | NA     | 28.584 | 28.187 | 26.550 | 27.439 | NA     | NA     | 19.477 | 21.177 | 61.407 | 63.994 |

|     |   |    |    |        |        |        |        |        |        |        |        |        |        |        |        |        |        |        |        |        |        |
|-----|---|----|----|--------|--------|--------|--------|--------|--------|--------|--------|--------|--------|--------|--------|--------|--------|--------|--------|--------|--------|
| 109 | L | NA | NA | 47.414 | 48.153 | 27.493 | 26.148 | 39.608 | 41.308 | 50.390 | 51.109 | NA     | NA     | 29.612 | 29.951 | 12.286 | 14.304 | 17.148 | 18.135 | 69.647 | 69.673 |
| 109 | R | NA | NA | 46.498 | 49.285 | 31.339 | 28.678 | 42.906 | 42.756 | 50.412 | 51.580 | 43.580 | 44.150 | 29.617 | 29.796 | 10.840 | 10.363 | NA     | NA     | NA     | NA     |
| 110 | L | NA | NA | 52.930 | 55.788 | 29.181 | 27.666 | 40.023 | 39.325 | 49.288 | 48.365 | 26.628 | 26.075 | 33.067 | 33.806 | 14.451 | 15.013 | 13.617 | 13.327 | 62.213 | 61.980 |
| 110 | R | NA | NA | 49.024 | 48.470 | 24.653 | 25.064 | 36.677 | 36.080 | NA     | NA     | NA     | NA     | 33.511 | 32.704 | NA     | NA     | 16.986 | 15.866 | NA     | NA     |
| 111 | L | NA | NA | 48.619 | 49.288 | 28.213 | 28.515 | 32.806 | 31.450 | 50.033 | 48.845 | 30.200 | 29.487 | 30.633 | 29.578 | 8.805  | 9.124  | 17.950 | 17.181 | NA     | NA     |
| 111 | R | NA | NA | 48.812 | 49.739 | 27.781 | 29.353 | 33.094 | 32.658 | 49.491 | 50.131 | NA     | NA     | NA     | NA     | 9.240  | 9.061  | 19.397 | 23.778 | 57.849 | 58.838 |
| 112 | R | NA | NA | 48.717 | 45.507 | 28.630 | 27.978 | 43.853 | 44.948 | 49.172 | 50.090 | NA     | NA     | 29.749 | 29.317 | 11.116 | 10.279 | 18.755 | 15.618 | 65.043 | 65.999 |
| 115 | L | NA | NA | 48.103 | 48.585 | 30.863 | 28.511 | 33.620 | 38.307 | 50.283 | 49.524 | 27.273 | 26.454 | NA     | NA     | 10.531 | 11.210 | 14.857 | 15.101 | NA     | NA     |
| 121 | L | NA | NA | 46.942 | 47.698 | 29.921 | 32.072 | NA     | NA     | 51.947 | 51.644 | 28.532 | 27.865 | 28.240 | 28.091 | 10.352 | 10.145 | 13.819 | 13.051 | 62.164 | 64.619 |
| 172 | L | NA | NA | 45.708 | 47.622 | NA     | NA     | 37.143 | 38.198 | 58.608 | 60.070 | 27.392 | 29.628 | NA     | NA     | NA     | NA     | 16.353 | 17.049 | NA     | NA     |
| 172 | R | NA | NA | 47.313 | 49.219 | 31.677 | 31.513 | 35.989 | 35.827 | 52.965 | 54.247 | NA     | NA     | 28.409 | 29.471 | 14.010 | 14.033 | NA     | NA     | 58.837 | 62.114 |
| 213 | L | NA | NA | 50.240 | 51.628 | NA     | NA     | 33.183 | 33.313 | 48.148 | 47.403 | 26.064 | 27.097 | 26.156 | 27.112 | 19.187 | 19.359 | 15.500 | 14.855 | 49.896 | 52.028 |
| 223 | L | NA | NA | 46.686 | 46.365 | NA     | NA     | NA     | NA     | 53.259 | 55.541 | 35.653 | 30.983 | 30.947 | 30.804 | 15.500 | 16.014 | NA     | NA     | 69.383 | 70.332 |
| 231 | L | NA | NA | 47.603 | 46.325 | NA     | NA     | NA     | NA     | 55.898 | 56.551 | 32.819 | 31.721 | NA     | NA     | 18.851 | 20.751 | 13.021 | 14.997 | NA     | NA     |
| 231 | R | NA | NA | 49.032 | 47.935 | 27.390 | 28.064 | 35.255 | 35.849 | NA     | NA     | NA     | NA     | 30.762 | 29.135 | 11.210 | 10.845 | 16.323 | 16.916 | 60.231 | 61.753 |
| 239 | L | NA | NA | 47.573 | 47.950 | NA     | NA     | 39.196 | 40.670 | 43.729 | 38.959 | 34.813 | 37.589 | NA     | NA     | 12.885 | 11.979 | 11.221 | 11.028 | NA     | NA     |
| 257 | L | NA | NA | 50.356 | 50.061 | 29.609 | 25.019 | 36.705 | 36.659 | NA     | NA     | 33.120 | 35.066 | NA     | NA     | NA     | NA     | 16.604 | 16.028 | 65.111 | 63.624 |
| 257 | R | NA | NA | 46.880 | 49.017 | NA     | NA     | 35.671 | 38.913 | 46.269 | 50.259 | NA     | NA     | 31.761 | 32.605 | 17.262 | 16.253 | 12.539 | 13.223 | 62.904 | 61.420 |
| 265 | R | NA | NA | 45.687 | 43.467 | NA     | NA     | 34.031 | 36.811 | NA     | NA     | 30.923 | 34.935 | 28.746 | 29.796 | 10.715 | 11.372 | 17.196 | 17.466 | NA     | NA     |
| 269 | L | NA | NA | 47.918 | 48.020 | 31.383 | 30.774 | 37.959 | 41.361 | 45.756 | 47.626 | 33.084 | 34.105 | 26.112 | 23.070 | 11.690 | 12.463 | 16.257 | 19.381 | 64.522 | 65.387 |
| 269 | R | NA | NA | 45.740 | 44.491 | 26.904 | 26.604 | 34.755 | 32.418 | NA     | NA     | 40.587 | 38.004 | 25.447 | 26.044 | 9.967  | 9.700  | 11.887 | 13.881 | NA     | NA     |
| 278 | L | NA | NA | 46.166 | 47.104 | 26.721 | 26.394 | NA     | NA     | 40.322 | 42.869 | 38.390 | 42.500 | 30.470 | 29.019 | NA     | NA     | 10.126 | 11.682 | NA     | NA     |
| 278 | R | NA | NA | 49.737 | 48.599 | 23.996 | 24.900 | 34.753 | 33.927 | 40.064 | 41.056 | NA     | NA     | 29.432 | 25.905 | 11.993 | 13.996 | 9.266  | 9.711  | 55.649 | 57.013 |
| 286 | R | NA | NA | 44.148 | 43.068 | 26.641 | 26.673 | 33.948 | 36.163 | 52.346 | 52.835 | 31.562 | 33.193 | 28.908 | 29.051 | 12.501 | 11.129 | 18.731 | 20.083 | 61.612 | 60.542 |
| 295 | R | NA | NA | 51.863 | 50.050 | 27.808 | 30.653 | 32.530 | 34.726 | 57.980 | 54.380 | 40.473 | 40.151 | 24.483 | 23.595 | 9.853  | 9.480  | NA     | NA     | NA     | NA     |
| 314 | R | NA | NA | 49.364 | 51.859 | 32.425 | 32.033 | NA     | NA     | 53.396 | 57.053 | 38.506 | 38.527 | 25.472 | 26.612 | 7.349  | 7.276  | NA     | NA     | NA     | NA     |
| 321 | L | NA | NA | 46.675 | 43.207 | 30.712 | 33.500 | 36.431 | 35.240 | 48.648 | 47.972 | 43.280 | 44.767 | 27.233 | 29.989 | NA     | NA     | 10.135 | 12.905 | 71.073 | 64.452 |
| 321 | R | NA | NA | 46.406 | 44.597 | 29.134 | 29.791 | NA     | NA     | 51.315 | 48.528 | 44.141 | 43.872 | 27.585 | 27.045 | 11.664 | 9.201  | NA     | NA     | 60.012 | 59.059 |
| 329 | L | NA | NA | 44.117 | 45.799 | 27.774 | 27.407 | 44.491 | 40.791 | 54.253 | 55.029 | 27.439 | 26.963 | 29.803 | 30.872 | 8.625  | 8.625  | 16.571 | 18.793 | 60.299 | 60.433 |
| 329 | R | NA | NA | 45.187 | 45.379 | 25.798 | 24.015 | NA     | NA     | NA     | NA     | 35.344 | 36.615 | 30.155 | 30.862 | 6.872  | 6.872  | 14.479 | 14.644 | NA     | NA     |
| 356 | L | NA | NA | 56.909 | 52.772 | 26.246 | 28.525 | 36.882 | 37.118 | NA     | NA     | 30.473 | 31.191 | 30.922 | 30.478 | 16.799 | 15.610 | 18.554 | 18.806 | 45.231 | 42.904 |

|     |   |    |    |        |        |        |        |        |        |        |        |        |        |        |        |        |        |        |        |        |        |
|-----|---|----|----|--------|--------|--------|--------|--------|--------|--------|--------|--------|--------|--------|--------|--------|--------|--------|--------|--------|--------|
| 356 | R | NA | NA | 53.376 | 52.905 | 21.675 | 22.541 | 33.225 | 35.943 | 50.829 | 48.809 | NA     | NA     | 28.896 | 28.762 | 16.698 | 16.490 | 21.155 | 20.577 | 40.022 | 36.909 |
| 365 | L | NA | NA | 50.788 | 51.193 | NA     | NA     | 36.300 | 35.996 | 48.763 | 48.214 | 31.185 | 31.373 | 25.888 | 25.897 | 11.120 | 11.564 | 24.470 | 23.231 | 44.802 | 46.237 |
| 365 | R | NA | NA | 46.785 | 49.018 | 25.801 | 26.200 | 35.191 | 33.375 | 48.630 | 48.157 | 35.107 | 33.904 | NA     | NA     | 10.677 | 11.070 | NA     | NA     | 40.982 | 39.094 |
| 375 | L | NA | NA | 54.439 | 55.469 | 26.365 | 25.800 | 43.344 | 41.365 | 47.219 | 46.871 | 26.053 | 24.815 | 29.443 | 28.559 | 15.285 | 15.427 | 22.719 | 21.432 | 37.704 | 37.119 |
| 375 | R | NA | NA | 50.852 | 50.806 | NA     | NA     | NA     | NA     | NA     | NA     | 38.476 | 39.567 | 28.638 | 28.460 | 13.467 | 12.858 | 22.092 | 18.568 | 48.706 | 53.080 |
| 385 | L | NA | NA | 50.862 | 50.873 | 25.876 | 28.982 | NA     | NA     | 48.678 | 50.027 | 27.399 | 27.425 | 29.633 | 30.963 | 9.968  | 10.644 | 18.492 | 20.949 | 40.730 | 40.652 |
| 385 | R | NA | NA | 46.517 | 46.900 | NA     | NA     | 37.964 | 36.496 | 50.041 | 51.078 | NA     | NA     | 34.823 | 32.708 | 12.081 | 15.587 | 18.026 | 18.328 | 48.589 | 46.930 |
| 396 | L | NA | NA | 49.674 | 50.307 | 25.872 | 27.001 | NA     | NA     | 52.102 | 51.619 | 36.736 | 36.869 | 31.032 | 30.867 | 14.710 | 13.959 | NA     | NA     | NA     | NA     |
| 396 | R | NA | NA | 49.034 | 47.988 | 21.871 | 24.634 | 37.011 | 37.763 | NA     | NA     | NA     | NA     | 32.150 | 32.096 | 11.465 | 11.948 | 10.731 | 10.995 | NA     | NA     |
| 519 | L | NA | NA | 49.307 | 50.722 | 23.428 | 24.175 | NA     | NA     | NA     | NA     | NA     | NA     | 29.435 | 30.066 | 15.824 | 14.593 | 14.758 | 15.110 | NA     | NA     |
| 529 | L | NA | NA | 49.012 | 48.124 | 28.717 | 29.291 | NA     | NA     | NA     | NA     | NA     | NA     | 25.153 | 25.131 | 10.300 | 11.300 | 10.407 | 11.622 | NA     | NA     |
| 541 | R | NA | NA | 48.418 | 46.283 | 29.885 | 29.874 | NA     | NA     | NA     | NA     | NA     | NA     | 33.586 | 31.053 | 14.201 | 14.209 | 8.779  | 9.059  | NA     | NA     |
| 562 | R | NA | NA | 44.961 | 44.208 | 31.531 | 30.047 | NA     | NA     | NA     | NA     | NA     | NA     | 29.890 | 30.074 | 13.475 | 14.322 | NA     | NA     | NA     | NA     |
| 571 | R | NA | NA | 43.056 | 45.094 | 33.308 | 33.092 | NA     | 13.231 | 12.812 | NA     | NA     | NA     | NA     |
| 590 | L | NA | NA | 47.880 | 47.209 | 28.847 | 30.421 | NA     | 9.078  | 9.260  | NA     | NA     | NA     | NA     |
| 590 | R | NA | NA | 48.993 | 47.265 | 27.758 | 26.209 | NA     | NA     | NA     | NA     | NA     | NA     | 32.305 | 34.155 | 12.697 | 13.233 | NA     | NA     | NA     | NA     |
| 598 | L | NA | NA | 48.002 | 46.884 | 28.076 | 27.996 | NA     | NA     | NA     | NA     | NA     | NA     | 28.033 | 25.758 | 10.232 | 10.837 | NA     | NA     | NA     | NA     |
| 598 | R | NA | NA | 46.174 | 47.145 | 29.985 | 26.937 | NA     | 10.043 | 10.390 | NA     | NA     | NA     | NA     |
| 624 | L | NA | NA | 47.176 | 49.854 | 25.408 | 24.014 | NA     |
| 3   | L | NA | NA | 52.108 | 53.790 | 33.677 | 29.818 | 35.819 | 38.112 | 49.686 | 52.431 | 37.307 | 32.645 | 26.624 | 26.909 | 15.296 | 15.523 | NA     | NA     | 62.580 | 63.850 |
| 3   | R | NA | NA | 50.550 | 46.885 | 30.890 | 31.348 | NA     | NA     | 49.369 | 52.369 | 39.905 | 42.059 | NA     | NA     | NA     | NA     | 21.069 | 22.632 | NA     | NA     |
| 10  | L | NA | NA | 49.276 | 49.277 | NA     | NA     | 40.667 | 42.208 | NA     | NA     | 39.677 | 41.063 | NA     |
| 11  | L | NA | NA | 44.597 | 46.413 | 27.048 | 26.896 | 40.588 | 40.616 | NA     | NA     | NA     | NA     | 26.626 | 25.471 | 13.337 | 14.817 | 17.082 | 17.409 | 58.672 | 59.604 |
| 11  | R | NA | NA | 50.336 | 50.273 | 28.077 | 28.791 | 40.059 | 40.106 | 48.539 | 51.089 | 46.434 | 45.507 | 26.493 | 26.845 | 12.508 | 13.503 | NA     | NA     | NA     | NA     |
| 16  | R | NA | NA | 50.727 | 51.233 | 26.601 | 25.778 | 38.792 | 39.779 | NA     | NA     | NA     | NA     | 28.990 | 29.649 | 14.626 | 14.707 | 22.995 | 25.351 | 62.390 | 63.716 |
| 21  | R | NA | NA | 50.510 | 46.994 | 29.814 | 30.679 | 40.936 | 40.666 | 50.457 | 49.813 | 38.199 | 40.313 | 29.615 | 30.251 | 9.983  | 10.704 | 23.898 | 22.716 | NA     | NA     |
| 22  | L | NA | NA | 51.892 | 50.543 | 25.823 | 24.661 | 41.372 | 45.908 | 50.637 | 50.030 | 41.425 | 41.111 | 25.304 | 26.715 | 13.269 | 13.080 | 17.312 | 17.146 | 66.950 | 67.840 |
| 25  | R | NA | NA | 46.220 | 43.032 | 30.217 | 29.728 | 42.492 | 42.568 | 55.087 | 57.659 | 38.378 | 36.735 | NA     | NA     | 10.989 | 11.162 | 27.063 | 28.407 | 62.117 | 62.000 |
| 30  | R | NA | NA | 50.001 | 49.779 | 28.974 | 29.489 | 38.474 | 39.422 | NA     | NA     | NA     | NA     | 27.691 | 28.855 | 15.508 | 14.246 | NA     | NA     | 70.232 | 70.980 |
| 31  | L | NA | NA | 45.761 | 45.800 | 28.538 | 29.298 | 42.043 | 41.521 | 54.815 | 54.524 | 35.548 | 37.130 | NA     | NA     | 10.152 | 9.952  | NA     | NA     | 69.144 | 69.068 |
| 31  | R | NA | NA | 45.683 | 44.455 | 27.406 | 27.851 | 37.594 | 38.256 | NA     | NA     | 40.202 | 38.340 | 27.937 | 28.275 | 11.288 | 11.477 | 23.254 | 23.070 | NA     | NA     |

|    |   |    |    |        |        |        |        |        |        |        |        |        |        |        |        |        |        |        |        |        |        |
|----|---|----|----|--------|--------|--------|--------|--------|--------|--------|--------|--------|--------|--------|--------|--------|--------|--------|--------|--------|--------|
| 35 | R | NA | NA | 47.507 | 45.443 | 30.452 | 29.967 | 35.597 | 37.241 | 59.195 | 57.871 | 39.138 | 41.068 | 28.072 | 28.393 | 15.957 | 16.172 | 17.678 | 16.624 | NA     | NA     |
| 38 | R | NA | NA | 45.110 | 46.472 | 28.684 | 31.207 | 35.542 | 35.477 | 50.185 | 51.998 | 40.592 | 40.766 | 26.504 | 26.605 | 11.298 | 12.338 | 20.700 | 23.167 | NA     | NA     |
| 39 | R | NA | NA | 48.553 | 45.293 | 26.611 | 29.197 | 41.943 | 40.634 | NA     | NA     | 35.958 | 37.800 | 26.307 | 26.105 | 14.226 | 14.414 | 19.926 | 21.276 | NA     | NA     |
| 44 | L | NA | NA | 45.047 | 45.146 | 30.808 | 32.291 | 39.486 | 39.137 | 55.669 | 55.760 | NA     | NA     | 29.712 | 30.632 | NA     | NA     | 23.203 | 22.556 | 65.619 | 65.207 |
| 44 | R | NA | NA | 44.502 | 45.632 | 29.550 | 29.498 | NA     | NA     | NA     | NA     | 38.029 | 37.445 | 29.639 | 30.093 | 16.858 | 16.588 | NA     | NA     | 56.220 | 56.614 |
| 47 | L | NA | NA | 50.598 | 48.797 | 31.158 | 29.035 | NA     | NA     | 56.073 | 52.899 | 33.825 | 32.479 | 26.981 | 27.665 | 6.999  | 5.900  | 16.531 | 16.165 | 63.264 | 62.694 |
| 48 | R | NA | NA | 49.262 | 49.003 | 27.624 | 28.056 | NA     | NA     | 47.372 | 49.808 | NA     | NA     | 27.018 | 27.686 | 9.426  | 9.995  | NA     | NA     | 61.857 | 60.559 |
| 49 | L | NA | NA | 43.455 | 47.284 | NA     | NA     | 39.947 | 39.321 | 52.501 | 52.808 | 36.755 | 37.247 | 25.700 | 25.955 | 15.706 | 15.235 | 26.825 | 25.179 | 68.284 | 66.366 |
| 49 | R | NA | NA | 46.235 | 45.404 | 26.135 | 26.707 | 35.502 | 35.236 | 51.232 | 51.079 | 42.570 | 39.774 | NA     | NA     | 15.458 | 16.825 | NA     | NA     | NA     | NA     |
| 50 | L | NA | NA | 45.187 | 45.069 | 35.682 | 35.334 | 44.193 | 43.219 | 55.751 | 53.207 | 36.857 | 33.669 | 26.370 | 26.893 | 9.638  | 7.897  | NA     | NA     | NA     | NA     |
| 52 | L | NA | NA | 44.772 | 45.675 | 29.310 | 29.414 | 41.248 | 40.748 | 53.501 | 54.285 | 39.414 | 41.382 | NA     | NA     | 13.193 | 12.722 | 17.390 | 17.224 | 60.771 | 65.529 |
| 57 | L | NA | NA | 47.059 | 50.691 | 28.079 | 27.774 | 40.314 | 39.160 | 50.100 | 50.342 | 34.105 | 34.125 | 28.236 | 29.562 | NA     | NA     | 20.891 | 20.409 | 54.211 | 49.917 |
| 57 | R | NA | NA | 42.440 | 42.593 | 28.831 | 27.575 | 44.425 | 46.004 | NA     | NA     | NA     | NA     | NA     | NA     | 15.245 | 13.055 | NA     | NA     | NA     | NA     |
| 60 | L | NA | NA | 45.113 | 45.079 | 30.624 | 30.167 | 34.461 | 33.753 | 51.556 | 51.014 | 30.357 | 32.886 | NA     | NA     | NA     | NA     | NA     | NA     | 57.923 | 56.630 |
| 62 | L | NA | NA | 50.204 | 53.212 | 30.062 | 29.946 | 38.352 | 37.522 | 52.987 | 55.939 | 35.237 | 35.287 | 28.820 | 29.604 | 13.582 | 13.232 | NA     | NA     | 64.354 | 68.367 |
| 64 | L | NA | NA | 46.915 | 46.349 | 32.265 | 34.253 | 40.460 | 40.751 | 51.462 | 52.180 | 42.567 | 41.698 | 31.061 | 30.990 | 13.222 | 13.952 | 23.368 | 22.979 | 62.987 | 64.713 |
| 64 | R | NA | NA | 48.866 | 48.966 | 31.538 | 32.013 | 38.440 | 37.555 | 59.804 | 56.365 | 40.302 | 40.942 | 29.141 | 29.928 | 15.097 | 15.274 | NA     | NA     | NA     | NA     |
| 68 | L | NA | NA | 48.566 | 49.122 | 26.981 | 27.778 | 36.122 | 36.666 | 54.985 | 54.442 | 39.509 | 40.219 | 28.256 | 27.606 | 13.345 | 14.575 | 14.865 | 14.139 | 55.272 | 56.796 |
| 68 | R | NA | NA | 48.392 | 49.052 | 23.853 | 23.625 | 37.133 | 34.639 | 52.692 | 51.874 | 38.975 | 42.295 | 32.165 | 32.815 | NA     | NA     | NA     | NA     | 56.956 | 55.656 |
| 69 | L | NA | NA | 43.990 | 46.765 | 30.073 | 33.027 | 42.144 | 40.679 | 51.972 | 52.172 | 41.121 | 39.826 | 31.780 | 30.212 | 10.923 | 11.453 | 22.286 | 21.895 | 63.512 | 62.991 |
| 69 | R | NA | NA | 48.480 | 47.866 | NA     | NA     | NA     | NA     | 47.128 | 48.401 | 44.880 | 45.731 | 29.248 | 30.650 | NA     | NA     | NA     | NA     | NA     | NA     |
| 70 | R | NA | NA | 55.163 | 55.170 | NA     | NA     | 36.956 | 35.157 | NA     | NA     | 39.246 | 39.187 | 31.885 | 31.795 | NA     | NA     | NA     | NA     | 58.099 | 59.168 |
| 75 | L | NA | NA | 48.190 | 47.228 | 28.987 | 28.227 | 43.470 | 44.214 | 50.874 | 49.895 | 40.491 | 42.991 | 32.327 | 32.809 | 9.346  | 9.720  | 20.304 | 20.719 | 64.359 | 64.888 |
| 75 | R | NA | NA | 52.130 | 52.323 | 25.109 | 26.301 | 40.721 | 42.965 | 50.722 | 53.108 | 46.640 | 44.173 | 31.191 | 31.055 | NA     | NA     | 26.483 | 27.870 | NA     | NA     |
| 77 | L | NA | NA | 44.375 | 48.598 | 35.247 | 33.173 | 43.106 | 45.125 | 47.676 | 48.656 | 26.440 | 26.780 | NA     | NA     | 12.815 | 12.953 | 19.227 | 18.532 | 66.570 | 67.547 |
| 77 | R | NA | NA | 47.653 | 48.756 | 33.308 | 32.701 | 40.802 | 42.499 | 45.821 | 46.673 | 38.432 | 38.069 | 27.744 | 27.924 | 13.798 | 12.284 | NA     | NA     | 61.647 | 63.341 |
| 78 | R | NA | NA | 47.764 | 47.346 | 31.608 | 29.136 | 38.826 | 37.524 | 45.525 | 44.596 | NA     | NA     | 28.151 | 28.142 | 13.963 | 13.795 | 25.289 | 24.668 | 59.853 | 58.979 |
| 84 | R | NA | NA | 47.940 | 48.186 | 26.078 | 26.729 | 42.538 | 42.105 | NA     | NA     | 38.692 | 39.888 | 29.329 | 30.725 | 13.330 | 12.158 | NA     | NA     | NA     | NA     |
| 85 | L | NA | NA | 46.213 | 44.391 | 35.481 | 35.773 | 39.319 | 39.020 | 50.490 | 52.335 | 29.612 | 29.951 | 29.395 | 30.405 | 14.558 | 14.578 | NA     | NA     | 58.822 | 59.625 |
| 87 | L | NA | NA | 45.335 | 45.709 | 35.286 | 36.353 | NA     | NA     | 54.046 | 53.203 | NA     | NA     | 28.553 | 30.078 | NA     | NA     | NA     | NA     | 59.328 | 59.231 |
| 87 | R | NA | NA | 44.381 | 46.213 | 38.308 | 37.841 | 38.918 | 35.827 | 48.088 | 48.082 | 38.172 | 38.340 | 30.135 | 30.475 | 13.839 | 13.464 | 25.458 | 25.116 | 57.747 | 55.659 |

|     |   |    |    |        |        |        |        |        |        |        |        |        |        |        |        |        |        |        |        |        |        |
|-----|---|----|----|--------|--------|--------|--------|--------|--------|--------|--------|--------|--------|--------|--------|--------|--------|--------|--------|--------|--------|
| 88  | L | NA | NA | 44.199 | 43.690 | 32.100 | 31.487 | 35.528 | 33.601 | NA     | NA     | 30.633 | 29.578 | 25.286 | 26.827 | 16.689 | 14.426 | 13.218 | 13.482 | 64.624 | 66.648 |
| 92  | L | NA | NA | 44.995 | 45.246 | 29.133 | 29.256 | NA     | NA     | 52.370 | 53.634 | 32.077 | 31.463 | 31.464 | 32.971 | NA     | NA     | 21.249 | 21.775 | NA     | NA     |
| 95  | L | NA | NA | 50.977 | 50.802 | 29.576 | 31.388 | 37.736 | 37.070 | 50.581 | 51.060 | 28.240 | 28.091 | 28.860 | 29.983 | 13.188 | 13.539 | 16.528 | 14.341 | 59.715 | 60.412 |
| 128 | L | NA | NA | 45.045 | 46.173 | 29.921 | 29.219 | NA     | NA     | 53.070 | 53.152 | 27.450 | 27.784 | 26.474 | 27.224 | 20.227 | 18.513 | NA     | NA     | 60.654 | 58.025 |
| 129 | L | NA | NA | 51.335 | 49.027 | 24.620 | 28.377 | NA     | NA     | 56.774 | 59.881 | 27.045 | 27.043 | 27.680 | 29.380 | NA     | NA     | 15.199 | 15.157 | 66.910 | 61.509 |
| 131 | R | NA | NA | 48.675 | 49.926 | 32.485 | 28.852 | NA     | NA     | NA     | NA     | 36.363 | 37.306 | 32.030 | 31.583 | 12.144 | 12.809 | 20.381 | 19.621 | 58.150 | 57.741 |
| 142 | L | NA | NA | 46.382 | 48.425 | 33.100 | 33.803 | 40.357 | 41.903 | 51.818 | 50.684 | 27.281 | 27.806 | 30.955 | 30.406 | NA     | NA     | 27.241 | 27.272 | 64.732 | 66.614 |
| 148 | L | NA | NA | 48.854 | 47.392 | 29.668 | 32.981 | 42.460 | 40.897 | 50.319 | 50.194 | 28.722 | 28.043 | 30.827 | 31.005 | 10.862 | 11.385 | NA     | NA     | 73.882 | 70.712 |
| 148 | R | NA | NA | 48.523 | 47.320 | NA     | NA     | NA     | NA     | 51.289 | 50.777 | NA     | NA     | 29.293 | 27.776 | NA     | NA     | 21.308 | 20.379 | 66.629 | 66.112 |
| 152 | L | NA | NA | 48.732 | 48.144 | 30.382 | 29.131 | 38.964 | 37.830 | 46.801 | 48.145 | 24.884 | 25.148 | 31.082 | 32.168 | 19.828 | 18.581 | NA     | NA     | 66.344 | 64.563 |
| 153 | R | NA | NA | 44.188 | 43.932 | NA     | NA     | 42.160 | 43.490 | 50.059 | 49.332 | NA     | NA     | 31.523 | 30.288 | 12.185 | 11.275 | 23.090 | 23.259 | 66.050 | 66.719 |
| 154 | L | NA | NA | 49.351 | 49.319 | 32.036 | 29.171 | 38.797 | 36.944 | 45.825 | 42.841 | 30.135 | 29.367 | 34.895 | 33.729 | 10.114 | 10.233 | NA     | NA     | 73.946 | 74.305 |
| 157 | L | NA | NA | 48.562 | 48.606 | 30.360 | 28.284 | 45.001 | 44.230 | 48.715 | 49.004 | 26.816 | 28.114 | 27.045 | 27.043 | 12.196 | 11.841 | 18.856 | 19.021 | 67.981 | 65.632 |
| 159 | L | NA | NA | 56.019 | 54.517 | NA     | NA     | 41.898 | 40.930 | 47.444 | 45.095 | NA     | NA     | 29.449 | 30.158 | 14.154 | 15.982 | 22.306 | 19.500 | 62.017 | 61.052 |
| 160 | L | NA | NA | 51.119 | 48.828 | 30.115 | 31.766 | 38.529 | 37.723 | NA     | NA     | 29.182 | 28.964 | NA     | NA     | 8.821  | 8.940  | NA     | NA     | NA     | NA     |
| 160 | R | NA | NA | 47.039 | 45.631 | NA     | NA     | NA     | NA     | 60.916 | 58.983 | NA     | NA     | 33.004 | 32.521 | NA     | NA     | 26.241 | 25.951 | 56.417 | 59.662 |
| 162 | L | NA | NA | 50.809 | 49.848 | 31.715 | 30.877 | 36.342 | 37.262 | 51.225 | 50.369 | 27.055 | 27.682 | NA     | NA     | 17.023 | 17.297 | NA     | NA     | 61.837 | 60.946 |
| 162 | R | NA | NA | 49.969 | 49.110 | 32.069 | 32.063 | NA     | NA     | NA     | NA     | 37.348 | 40.824 | 29.082 | 29.301 | 15.190 | 12.687 | 11.573 | 12.530 | 63.638 | 66.253 |
| 163 | R | NA | NA | 48.440 | 47.419 | 29.834 | 29.339 | 37.783 | 37.616 | 50.648 | 49.609 | 43.149 | 42.273 | 30.473 | 30.559 | 14.959 | 15.178 | 20.832 | 21.883 | 61.536 | 63.992 |
| 164 | L | NA | NA | 52.712 | 52.422 | 30.146 | 29.566 | 38.854 | 38.895 | 48.575 | 48.185 | 30.399 | 28.873 | NA     |
| 164 | R | NA | NA | 53.544 | 52.978 | 26.234 | 25.931 | 42.445 | 43.827 | 47.631 | 46.875 | NA     | NA     | 30.696 | 31.291 | 8.407  | 8.462  | 16.366 | 14.595 | 52.698 | 57.066 |
| 166 | L | NA | NA | 47.218 | 46.966 | 34.658 | 33.730 | 43.131 | 39.430 | NA     | NA     | 27.458 | 27.885 | NA     | NA     | NA     | NA     | 22.838 | 23.599 | 60.064 | 60.730 |
| 166 | R | NA | NA | 45.217 | 45.467 | 31.878 | 32.190 | NA     | NA     | 54.804 | 55.039 | 38.653 | 37.598 | 28.257 | 27.813 | 16.940 | 15.413 | 21.678 | 19.636 | 60.690 | 60.971 |
| 168 | R | NA | NA | 51.525 | 49.841 | 25.625 | 26.297 | 37.997 | 38.528 | NA     | NA     | NA     | NA     | 29.288 | 29.686 | 16.635 | 15.056 | 14.476 | 15.212 | 62.597 | 64.249 |
| 169 | R | NA | NA | 48.458 | 47.525 | 32.332 | 30.203 | 42.147 | 42.208 | 50.225 | 48.486 | NA     | NA     | 32.836 | 32.626 | 12.195 | 11.872 | NA     | NA     | NA     | NA     |
| 171 | L | NA | NA | 49.573 | 49.335 | 29.742 | 27.887 | 35.333 | 35.150 | 52.676 | 52.102 | 27.328 | 27.689 | NA     | NA     | NA     | NA     | 15.273 | 15.239 | 63.504 | 66.963 |
| 173 | R | NA | NA | 45.084 | 44.820 | 28.269 | 26.970 | NA     | NA     | 51.677 | 52.410 | 39.297 | 40.795 | 30.219 | 31.883 | 13.098 | 13.767 | NA     | NA     | 57.694 | 59.464 |
| 174 | R | NA | NA | 47.525 | 47.764 | 28.473 | 28.360 | NA     | NA     | 53.913 | 56.561 | NA     | NA     | 29.091 | 28.967 | 9.163  | 9.621  | 22.363 | 21.844 | 53.833 | 52.498 |
| 179 | L | NA | NA | 48.226 | 44.678 | 32.734 | 33.364 | 36.537 | 37.924 | 50.816 | 52.613 | 36.379 | 36.581 | 27.281 | 27.806 | 13.895 | 14.202 | 20.938 | 21.782 | 66.668 | 71.654 |
| 179 | R | NA | NA | 44.644 | 43.259 | NA     | NA     | 36.305 | 36.324 | 49.854 | 49.870 | 37.601 | 37.480 | NA     | NA     | NA     | NA     | 24.441 | 24.182 | NA     | NA     |
| 180 | L | NA | NA | 45.729 | 50.615 | 28.743 | 27.168 | 37.346 | 36.725 | NA     | NA     | 40.098 | 43.848 | 28.019 | 28.157 | NA     | NA     | 22.910 | 23.139 | NA     | NA     |

|     |   |    |    |        |        |        |        |        |        |        |        |        |        |        |        |        |        |        |        |        |        |
|-----|---|----|----|--------|--------|--------|--------|--------|--------|--------|--------|--------|--------|--------|--------|--------|--------|--------|--------|--------|--------|
| 180 | R | NA | NA | 46.012 | 47.044 | NA     | NA     | NA     | NA     | 58.080 | 55.193 | 44.030 | 39.039 | 26.569 | 26.881 | 9.806  | 10.145 | NA     | NA     | 40.870 | 39.066 |
| 181 | L | NA | NA | 49.888 | 51.154 | 27.948 | 34.296 | 36.374 | 36.440 | 50.505 | 50.293 | 42.664 | 40.386 | 27.757 | 27.958 | NA     | NA     | 13.844 | 15.235 | NA     | NA     |
| 181 | R | NA | NA | 45.298 | 45.395 | 28.158 | 26.662 | 39.436 | 37.412 | 54.052 | 50.772 | 40.335 | 42.635 | NA     | NA     | 13.012 | 12.490 | 21.242 | 21.144 | 41.334 | 42.187 |
| 183 | L | NA | NA | 46.198 | 46.647 | 30.585 | 29.908 | 46.642 | 43.354 | NA     | NA     | 35.597 | 35.539 | 31.263 | 29.294 | NA     | NA     | 19.279 | 16.981 | 57.895 | 59.754 |
| 183 | R | NA | NA | 46.135 | 45.236 | 30.089 | 29.228 | NA     | NA     | 52.998 | 52.179 | 36.885 | 37.662 | 32.759 | 31.473 | 14.236 | 14.703 | 13.408 | 15.469 | 60.865 | 59.878 |
| 184 | R | NA | NA | 52.073 | 52.522 | 26.259 | 26.653 | 42.576 | 43.262 | 58.163 | 57.407 | 41.047 | 40.676 | 31.557 | 33.558 | NA     | NA     | 21.462 | 20.905 | 40.022 | 36.909 |
| 188 | L | NA | NA | 50.032 | 49.831 | 29.928 | 30.607 | 35.570 | 37.763 | 58.753 | 58.296 | NA     | NA     | 28.083 | 27.727 | 13.842 | 13.512 | 20.726 | 20.010 | NA     | NA     |
| 188 | R | NA | NA | 50.186 | 50.486 | 30.202 | 21.306 | 38.921 | 37.320 | 59.092 | 56.842 | 46.053 | 46.767 | 26.968 | 23.762 | 12.457 | 12.116 | NA     | NA     | 39.501 | 41.432 |
| 192 | R | NA | NA | 44.940 | 44.477 | 30.898 | 32.775 | 42.704 | 43.723 | 55.561 | 58.373 | 41.064 | 39.482 | 32.210 | 31.475 | 13.538 | 12.947 | 21.368 | 20.965 | 42.789 | 45.428 |
| 193 | L | NA | NA | 48.925 | 51.483 | NA     | NA     | 42.618 | 42.209 | NA     | NA     | 41.415 | 41.364 | 32.014 | 31.725 | 12.421 | 10.901 | 20.161 | 20.927 | 44.802 | 46.237 |
| 194 | L | NA | NA | 52.003 | 52.970 | 27.458 | 29.168 | NA     | 8.063  | 8.488  | 20.908 | 20.848 | 55.977 | 51.819 |
| 194 | R | NA | NA | 47.632 | 49.612 | 25.402 | 26.580 | 33.658 | 33.561 | 51.589 | 51.592 | 43.269 | 41.586 | 29.823 | 29.799 | 9.625  | 10.102 | 12.837 | 11.653 | NA     | NA     |
| 197 | L | NA | NA | 46.493 | 46.755 | 32.796 | 33.880 | 35.626 | 37.250 | 50.492 | 52.511 | 36.937 | 36.095 | NA     | NA     | 10.844 | 10.572 | NA     | NA     | 43.896 | 40.053 |
| 198 | L | NA | NA | 45.020 | 45.518 | 30.795 | 30.357 | 35.418 | 36.819 | 53.519 | 54.746 | 43.758 | 44.802 | 29.182 | 28.964 | 10.621 | 10.426 | NA     | NA     | 45.076 | 43.133 |
| 202 | R | NA | NA | 44.773 | 45.819 | 27.434 | 29.188 | 35.733 | 35.104 | NA     | NA     | 36.781 | 36.462 | 31.928 | 31.727 | 15.260 | 14.511 | 14.069 | 13.904 | 39.867 | 36.413 |
| 205 | L | NA | NA | 45.443 | 45.443 | 27.699 | 29.888 | 41.388 | 39.081 | NA     | NA     | 38.928 | 40.197 | 31.862 | 33.343 | NA     | NA     | 16.561 | 18.365 | 32.590 | 32.590 |
| 205 | R | NA | NA | 47.991 | 47.937 | NA     | NA     | NA     | NA     | 50.421 | 52.440 | 36.668 | 37.865 | NA     | NA     | 16.641 | 16.780 | NA     | NA     | 50.009 | 50.009 |
| 207 | R | NA | NA | 56.697 | 59.721 | 25.085 | 24.852 | 37.349 | 37.756 | NA     | NA     | NA     | NA     | 29.997 | 31.258 | 18.200 | 18.423 | 16.152 | 16.280 | 54.880 | 56.666 |
| 208 | L | NA | NA | 47.758 | 48.151 | 28.400 | 28.187 | 40.657 | 40.480 | 47.430 | 47.000 | NA     | NA     | 26.952 | 28.649 | 14.286 | 14.474 | NA     | NA     | NA     | NA     |
| 209 | R | NA | NA | 46.770 | 47.276 | 25.296 | 23.871 | 38.398 | 38.087 | 51.960 | 50.949 | 37.426 | 39.969 | 29.584 | 29.598 | NA     | NA     | 19.143 | 20.370 | 48.589 | 46.930 |
| 211 | R | NA | NA | 49.212 | 46.989 | 27.833 | 31.299 | 34.442 | 36.114 | 44.373 | 44.854 | 36.261 | 39.314 | 28.185 | 28.431 | 13.633 | 12.987 | NA     | NA     | 45.397 | 43.931 |
| 212 | R | NA | NA | 49.284 | 48.718 | 30.829 | 33.047 | 34.634 | 39.483 | 51.067 | 47.531 | 36.489 | 35.483 | 29.351 | 29.355 | 11.023 | 10.631 | 22.785 | 21.539 | NA     | NA     |
| 214 | R | NA | NA | 46.441 | 45.033 | 26.086 | 25.358 | 33.297 | 34.814 | NA     | NA     | 38.440 | 39.731 | 31.031 | 31.575 | NA     | NA     | 19.443 | 19.730 | NA     | NA     |
| 216 | R | NA | NA | 52.527 | 51.016 | 27.053 | 28.117 | 31.203 | 34.729 | NA     | NA     | NA     | NA     | 26.117 | 26.079 | 9.463  | 9.617  | 18.399 | 18.333 | 46.996 | 45.570 |
| 218 | R | NA | NA | 53.050 | 48.181 | 30.695 | 30.288 | 40.274 | 40.330 | 42.069 | 42.481 | NA     | NA     | 30.655 | 31.364 | NA     | NA     | 12.898 | 13.047 | 38.837 | 36.253 |
| 221 | L | NA | NA | 40.491 | 40.041 | NA     | NA     | 38.672 | 37.887 | 43.431 | 45.807 | 34.949 | 36.359 | 26.387 | 26.616 | 7.615  | 8.374  | NA     | NA     | 62.599 | 65.244 |
| 221 | R | NA | NA | 45.343 | 43.812 | 29.762 | 30.790 | 36.552 | 35.865 | 38.098 | 41.167 | 36.277 | 38.547 | 29.860 | 28.528 | 16.611 | 15.985 | 19.283 | 19.613 | NA     | NA     |
| 222 | R | NA | NA | 52.030 | 52.404 | 29.956 | 29.411 | 37.029 | 38.475 | NA     | NA     | NA     | NA     | 35.799 | 36.742 | 15.574 | 14.843 | 18.163 | 17.450 | 54.747 | 55.028 |
| 224 | R | NA | NA | 44.135 | 44.174 | 29.356 | 29.237 | 33.835 | 32.650 | 55.860 | 55.029 | 41.186 | 42.237 | 30.951 | 28.992 | 14.568 | 13.593 | 19.817 | 21.428 | 63.484 | 58.559 |
| 225 | L | NA | NA | 54.501 | 55.965 | NA     | NA     | 37.674 | 41.906 | 55.561 | 53.869 | NA     | NA     | 31.015 | 30.959 | NA     | NA     | 15.554 | 14.464 | 57.500 | 57.923 |
| 225 | R | NA | NA | 53.647 | 53.269 | 28.731 | 30.007 | 44.180 | 42.868 | 44.273 | 47.066 | 28.522 | 30.297 | 32.946 | 32.753 | 13.047 | 13.225 | NA     | NA     | 59.589 | 60.429 |

|     |   |    |    |        |        |        |        |        |        |        |        |        |        |        |        |        |        |        |        |        |        |
|-----|---|----|----|--------|--------|--------|--------|--------|--------|--------|--------|--------|--------|--------|--------|--------|--------|--------|--------|--------|--------|
| 226 | R | NA | NA | 46.030 | 47.178 | 31.196 | 33.037 | NA     | NA     | NA     | NA     | 35.836 | 32.256 | 28.536 | 29.020 | NA     | NA     | NA     | NA     | 55.544 | 56.216 |
| 228 | L | NA | NA | 46.411 | 45.502 | NA     | NA     | 41.243 | 41.666 | 49.009 | 48.437 | 36.744 | 33.029 | 29.317 | 28.730 | 12.072 | 12.756 | 18.523 | 18.917 | 71.635 | 70.171 |
| 230 | R | NA | NA | 43.820 | 43.199 | 29.689 | 28.639 | NA     | NA     | 40.433 | 43.828 | 39.736 | 37.803 | 29.938 | 29.941 | 9.582  | 11.104 | 15.241 | 15.902 | 55.992 | 53.915 |
| 232 | L | NA | NA | 43.243 | 43.951 | 34.070 | 32.830 | 40.382 | 40.085 | 46.057 | 47.625 | 38.300 | 38.195 | 31.953 | 31.995 | 15.737 | 15.574 | NA     | NA     | 63.265 | 67.728 |
| 232 | R | NA | NA | 43.089 | 43.569 | 31.581 | 31.198 | NA     | NA     | 46.875 | 48.901 | NA     | NA     | 29.664 | 29.973 | 13.454 | 13.751 | 20.209 | 21.575 | 64.894 | 61.656 |
| 233 | L | NA | NA | 49.012 | 49.488 | 30.113 | 28.724 | 37.982 | 38.463 | 43.077 | 40.561 | 41.754 | 36.929 | 30.431 | 31.279 | 7.891  | 7.278  | 13.673 | 14.908 | 55.664 | 57.040 |
| 233 | R | NA | NA | 45.714 | 46.194 | 34.612 | 34.570 | 31.548 | 35.276 | 39.372 | 37.168 | 38.756 | 40.863 | NA     | NA     | 13.232 | 12.661 | 18.106 | 18.219 | 51.870 | 54.517 |
| 234 | L | NA | NA | 51.644 | 52.509 | 26.654 | 26.835 | NA     | NA     | 45.953 | 45.563 | 37.193 | 40.848 | 29.237 | 30.618 | 17.156 | 16.926 | 16.315 | 18.189 | NA     | NA     |
| 234 | R | NA | NA | 49.614 | 49.655 | 27.004 | 27.085 | 38.774 | 36.963 | NA     | NA     | NA     | NA     | 29.055 | 29.744 | 16.840 | 15.664 | 19.887 | 19.480 | 59.500 | 61.749 |
| 235 | L | NA | NA | 52.647 | 54.687 | 25.955 | 26.146 | 39.126 | 38.598 | 43.674 | 44.707 | 36.610 | 33.992 | 30.764 | 31.570 | 13.127 | 12.589 | 18.396 | 19.804 | NA     | NA     |
| 236 | L | NA | NA | 48.133 | 48.579 | 26.792 | 26.130 | 38.813 | 36.307 | NA     | NA     | 38.035 | 38.578 | NA     | NA     | 13.922 | 13.613 | 20.828 | 22.895 | 63.181 | 65.155 |
| 236 | R | NA | NA | 47.655 | 47.515 | 26.096 | 25.629 | 32.447 | 31.091 | 45.085 | 48.354 | 41.071 | 41.384 | 31.893 | 30.784 | 10.672 | 11.088 | 16.086 | 16.437 | 63.928 | 60.563 |
| 237 | L | NA | NA | 44.566 | 44.024 | 26.742 | 27.360 | 33.923 | 32.611 | 42.774 | 45.466 | 36.499 | 34.765 | 32.816 | 32.527 | 10.387 | 10.782 | 22.244 | 23.045 | 65.676 | 63.900 |
| 237 | R | NA | NA | 47.229 | 47.667 | 26.358 | 25.222 | NA     | NA     | 42.367 | 42.547 | NA     | NA     | 28.420 | 30.109 | 9.604  | 10.135 | NA     | NA     | 67.642 | 64.433 |
| 238 | R | NA | NA | 41.857 | 42.166 | 26.776 | 26.771 | 37.248 | 35.606 | 44.143 | 45.762 | 35.142 | 38.152 | NA     | NA     | 9.006  | 9.997  | 14.211 | 14.425 | 67.718 | 63.080 |
| 240 | L | NA | NA | 50.344 | 51.416 | 28.838 | 28.567 | 37.305 | 37.722 | 41.732 | 41.732 | 41.106 | 43.242 | 32.371 | 32.926 | 9.928  | 9.482  | 13.817 | 13.020 | 66.469 | 61.902 |
| 240 | R | NA | NA | 55.101 | 54.004 | 25.822 | 26.352 | 35.768 | 36.353 | 45.591 | 45.591 | 36.326 | 39.235 | 31.716 | 31.582 | 11.190 | 10.277 | NA     | NA     | NA     | NA     |
| 241 | L | NA | NA | 51.083 | 47.992 | 25.124 | 27.080 | 41.702 | 41.182 | NA     | NA     | 33.594 | 35.694 | 31.981 | 30.518 | 14.207 | 15.365 | 18.014 | 16.524 | 56.254 | 54.780 |
| 241 | R | NA | NA | 49.476 | 49.155 | 24.394 | 24.706 | NA     | NA     | 38.401 | 42.463 | 35.411 | 37.264 | 34.541 | 34.617 | NA     | NA     | 17.677 | 19.735 | NA     | NA     |
| 242 | L | NA | NA | 48.163 | 50.737 | 30.936 | 32.150 | 39.341 | 39.153 | 43.128 | 46.176 | 36.135 | 36.135 | 26.769 | 27.546 | 14.308 | 12.049 | 17.932 | 19.403 | 65.359 | 60.895 |
| 242 | R | NA | NA | 49.105 | 46.881 | 29.015 | 29.771 | 37.487 | 38.731 | NA     | NA     | 34.611 | 34.611 | 28.211 | 28.173 | 11.866 | 14.432 | 20.582 | 23.701 | NA     | NA     |
| 243 | L | NA | NA | 43.753 | 42.742 | 28.835 | 27.408 | NA     | NA     | 43.710 | 41.687 | 39.795 | 42.189 | 34.207 | 31.936 | 7.368  | 6.913  | 14.341 | 17.115 | NA     | NA     |
| 243 | R | NA | NA | 42.903 | 42.025 | 30.070 | 30.099 | 36.408 | 33.322 | 46.377 | 48.661 | NA     | NA     | 35.772 | 34.762 | 14.718 | 15.968 | 11.421 | 10.944 | 64.528 | 61.035 |
| 244 | L | NA | NA | 42.772 | 43.886 | 24.125 | 23.771 | 37.785 | 37.455 | NA     | NA     | 33.106 | 35.845 | 28.201 | 28.561 | NA     | NA     | NA     | NA     | 61.782 | 61.844 |
| 244 | R | NA | NA | 45.148 | 46.023 | 25.561 | 25.469 | 35.600 | 39.564 | 47.139 | 52.037 | 38.188 | 41.318 | 31.083 | 32.846 | 14.655 | 15.691 | 24.226 | 25.895 | 60.845 | 57.641 |
| 245 | L | NA | NA | 52.948 | 50.700 | 28.870 | 28.050 | 41.981 | 38.513 | 35.586 | 35.586 | 40.059 | 39.044 | NA     | NA     | 16.593 | 16.001 | NA     | NA     | 65.900 | 63.639 |
| 245 | R | NA | NA | 52.240 | 52.635 | 27.221 | 26.865 | 35.972 | 38.018 | 43.719 | 43.719 | 39.253 | 42.151 | 31.887 | 31.792 | 15.012 | 14.395 | 15.026 | 16.353 | 67.714 | 67.026 |
| 246 | L | NA | NA | 49.956 | 49.253 | 26.533 | 28.225 | 39.769 | 37.854 | 45.397 | 47.482 | 33.891 | 33.891 | NA     | NA     | 13.401 | 13.565 | 21.703 | 23.781 | 68.618 | 65.307 |
| 246 | R | NA | NA | 50.798 | 49.903 | NA     | NA     | 38.982 | 37.924 | NA     | NA     | 35.194 | 35.194 | 30.607 | 30.252 | 16.840 | 16.850 | NA     | NA     | 61.139 | 64.491 |
| 247 | L | NA | NA | 51.079 | 52.048 | 26.343 | 25.762 | 48.452 | 44.224 | 44.817 | 44.458 | 32.038 | 34.723 | 29.306 | 29.311 | NA     | NA     | 17.505 | 20.281 | 66.739 | 67.675 |
| 248 | L | NA | NA | 53.475 | 52.280 | 28.829 | 28.723 | 43.066 | 39.362 | 45.842 | 47.220 | 30.055 | 34.755 | 29.514 | 31.710 | 16.508 | 15.952 | NA     | NA     | 57.338 | 58.759 |



|     |   |    |    |        |        |        |        |        |        |        |        |        |        |        |        |        |        |        |        |        |        |
|-----|---|----|----|--------|--------|--------|--------|--------|--------|--------|--------|--------|--------|--------|--------|--------|--------|--------|--------|--------|--------|
| 248 | R | NA | NA | 55.771 | 54.807 | 26.395 | 26.541 | 35.951 | 36.955 | 45.789 | 43.451 | NA     | NA     | 32.001 | 32.223 | 14.866 | 12.207 | 11.176 | 12.813 | 57.694 | 54.454 |
| 249 | L | NA | NA | 42.769 | 43.652 | 29.078 | 28.277 | 38.450 | 36.946 | 47.618 | 48.037 | NA     | NA     | 28.968 | 29.090 | 14.597 | 13.527 | 10.821 | 6.971  | 70.048 | 66.342 |
| 249 | R | NA | NA | 44.728 | 44.760 | 27.774 | 26.273 | NA     | NA     | NA     | NA     | 50.227 | 47.231 | 28.377 | 27.637 | 11.882 | 11.696 | 17.192 | 18.247 | NA     | NA     |
| 250 | L | NA | NA | 47.467 | 49.378 | 32.400 | 30.578 | NA     | NA     | 46.146 | 45.540 | 31.783 | 35.127 | 27.071 | 28.489 | 15.007 | 13.498 | 24.203 | 24.930 | 60.630 | 62.052 |
| 250 | R | NA | NA | 43.816 | 43.044 | 32.874 | 31.552 | 33.591 | 31.048 | 44.834 | 47.604 | 31.108 | 30.117 | 32.229 | 31.178 | 21.335 | 18.893 | 13.690 | 14.667 | 57.072 | 59.875 |
| 251 | R | NA | NA | 46.492 | 44.606 | 32.833 | 31.938 | 34.432 | 37.145 | 44.461 | 43.714 | NA     | NA     | 29.771 | 29.824 | NA     | NA     | NA     | NA     | 61.584 | 60.632 |
| 252 | L | NA | NA | 48.164 | 47.641 | NA     | NA     | 38.338 | 38.090 | 47.000 | 47.870 | NA     | NA     | 28.633 | 29.108 | NA     | NA     | 8.577  | 10.384 | 73.991 | 74.301 |
| 252 | R | NA | NA | 48.156 | 48.669 | 30.635 | 30.358 | 37.971 | 38.893 | 46.199 | 48.588 | 34.563 | 37.934 | 25.841 | 28.601 | 14.343 | 14.203 | 6.353  | 9.766  | 72.815 | 71.841 |
| 253 | L | NA | NA | 49.768 | 49.827 | 24.646 | 23.811 | 43.194 | 42.062 | NA     | NA     | 29.986 | 34.354 | 25.775 | 26.937 | 14.193 | 13.660 | NA     | NA     | 71.228 | 71.463 |
| 253 | R | NA | NA | 52.813 | 51.676 | 23.963 | 23.434 | NA     | NA     | 53.785 | 53.803 | 28.360 | 31.869 | 27.701 | 28.135 | NA     | NA     | 10.444 | 10.547 | 68.939 | 68.086 |
| 254 | L | NA | NA | 39.610 | 40.116 | 28.331 | 29.257 | 35.749 | 35.957 | 42.095 | 44.165 | 26.212 | 26.212 | 27.414 | 27.220 | 13.959 | 14.008 | 12.874 | 10.969 | 70.188 | 65.251 |
| 254 | R | NA | NA | 42.189 | 41.368 | 27.937 | 27.019 | 33.278 | 34.836 | NA     | NA     | 30.043 | 30.043 | 26.485 | 28.417 | 14.366 | 15.208 | 13.233 | 12.209 | 61.951 | 62.423 |
| 255 | L | NA | NA | 47.678 | 49.140 | 27.962 | 27.950 | 39.461 | 39.080 | 40.685 | 45.556 | NA     | NA     | 29.613 | 29.035 | NA     | NA     | 10.235 | 11.907 | 66.793 | 68.850 |
| 255 | R | NA | NA | 43.763 | 45.450 | 29.417 | 28.634 | 37.115 | 38.388 | NA     | NA     | 36.192 | 39.077 | NA     | NA     | 16.777 | 14.915 | 12.713 | 11.231 | 63.554 | 63.399 |
| 256 | L | NA | NA | 51.114 | 50.687 | 32.238 | 31.176 | 38.936 | 36.244 | 51.185 | 49.459 | 39.184 | 39.561 | 26.351 | 26.482 | 10.668 | 11.005 | 15.934 | 15.157 | 61.933 | 64.319 |
| 256 | R | NA | NA | 49.527 | 48.373 | 28.688 | 28.642 | 37.448 | 39.200 | NA     | NA     | 34.972 | 36.830 | 27.839 | 28.635 | 13.488 | 14.659 | 5.789  | 6.833  | 64.884 | 67.386 |
| 258 | L | NA | NA | 47.364 | 48.378 | NA     | NA     | 34.678 | 36.554 | 44.705 | 45.567 | 35.883 | 36.071 | 27.952 | 29.762 | 14.485 | 14.480 | 14.191 | 14.088 | 64.631 | 69.440 |
| 258 | R | NA | NA | 47.808 | 49.808 | 26.531 | 27.225 | NA     | NA     | 41.527 | 43.869 | NA     | NA     | 29.920 | 30.273 | NA     | NA     | 14.098 | 14.143 | 67.268 | 67.817 |
| 259 | L | NA | NA | 46.962 | 48.006 | NA     | NA     | 36.022 | 36.022 | 47.945 | 45.777 | 28.329 | 28.551 | 26.064 | 27.097 | 8.405  | 8.974  | 17.230 | 18.098 | NA     | NA     |
| 260 | L | NA | NA | 53.468 | 52.858 | 30.603 | 31.187 | 31.804 | 34.800 | 46.475 | 48.382 | 33.427 | 33.530 | 32.248 | 32.394 | 13.606 | 14.224 | NA     | NA     | 59.991 | 59.409 |
| 260 | R | NA | NA | 46.948 | 46.911 | 28.585 | 26.287 | NA     | NA     | NA     | NA     | 34.911 | 35.955 | 30.941 | 31.175 | 13.417 | 14.453 | 19.988 | 21.068 | NA     | NA     |
| 261 | L | NA | NA | 49.320 | 49.106 | 29.782 | 30.177 | NA     | NA     | 44.530 | 47.660 | 37.075 | 37.514 | NA     | NA     | 16.664 | 18.113 | NA     | NA     | 61.586 | 60.113 |
| 261 | R | NA | NA | 51.113 | 47.418 | 29.553 | 30.123 | 33.986 | 34.244 | NA     | NA     | 35.180 | 34.457 | 33.906 | 33.156 | 18.339 | 19.212 | 12.500 | 9.235  | 58.370 | 57.875 |
| 262 | L | NA | NA | 53.233 | 52.018 | 28.294 | 29.166 | 38.439 | 39.173 | NA     | NA     | 31.263 | 33.784 | 26.196 | 26.247 | 12.502 | 14.820 | NA     | NA     | 61.181 | 62.266 |
| 262 | R | NA | NA | 46.406 | 47.229 | NA     | NA     | 37.327 | 42.178 | 39.853 | 42.161 | 38.870 | 40.238 | 26.234 | 26.376 | NA     | NA     | 17.798 | 21.045 | 56.759 | 60.351 |
| 263 | R | NA | NA | 41.831 | 44.325 | 26.150 | 24.144 | 35.886 | 37.233 | 54.689 | 54.525 | 43.591 | 43.607 | 31.680 | 32.092 | 10.292 | 11.339 | 12.117 | 9.902  | NA     | NA     |
| 264 | L | NA | NA | 44.611 | 45.717 | 26.135 | 25.819 | 31.778 | 31.778 | NA     | NA     | 35.550 | 38.314 | NA     | NA     | 13.542 | 13.608 | 18.466 | 19.962 | 63.331 | 62.810 |
| 264 | R | NA | NA | 47.523 | 48.116 | 27.602 | 26.898 | 32.142 | 32.142 | 43.989 | 48.055 | 37.329 | 39.358 | 26.596 | 27.101 | NA     | NA     | NA     | NA     | 61.675 | 60.437 |
| 266 | L | NA | NA | 46.450 | 48.322 | 36.833 | 36.607 | 38.894 | 39.162 | 53.642 | 50.188 | 39.271 | 40.543 | 29.183 | 29.944 | 14.326 | 15.714 | 15.256 | 15.419 | 62.044 | 63.013 |
| 266 | R | NA | NA | 47.184 | 44.448 | 33.183 | 32.521 | 35.937 | 40.560 | NA     | NA     | 42.531 | 45.471 | 29.023 | 28.818 | NA     | NA     | NA     | NA     | NA     | NA     |
| 267 | R | NA | NA | 48.867 | 49.117 | 30.238 | 27.939 | 43.415 | 42.044 | 49.308 | 48.594 | 35.635 | 36.283 | 29.154 | 29.027 | 13.525 | 13.939 | NA     | NA     | NA     | NA     |

|     |   |    |    |        |        |        |        |        |        |        |        |        |        |        |        |        |        |        |        |        |        |
|-----|---|----|----|--------|--------|--------|--------|--------|--------|--------|--------|--------|--------|--------|--------|--------|--------|--------|--------|--------|--------|
| 270 | L | NA | NA | 49.722 | 50.908 | 28.348 | 29.642 | 34.834 | 39.425 | 55.439 | 53.085 | 33.264 | 36.903 | NA     | NA     | 8.717  | 10.348 | 10.341 | 13.240 | 56.525 | 60.383 |
| 270 | R | NA | NA | 48.810 | 48.351 | 27.939 | 26.720 | NA     | NA     | NA     | NA     | NA     | NA     | 29.518 | 29.847 | 14.835 | 15.041 | 8.500  | 11.996 | NA     | NA     |
| 271 | L | NA | NA | 47.687 | 51.784 | 29.875 | 29.019 | 45.695 | 46.427 | 53.434 | 53.078 | NA     | NA     | 31.574 | 32.655 | NA     | NA     | NA     | NA     | 60.075 | 64.178 |
| 271 | R | NA | NA | 47.458 | 51.015 | 27.262 | 26.980 | NA     | NA     | 51.560 | 52.629 | 45.600 | 41.686 | 29.824 | 30.466 | 13.425 | 13.752 | 15.188 | 16.639 | 59.677 | 62.855 |
| 272 | L | NA | NA | 46.375 | 49.405 | NA     | NA     | 34.143 | 38.076 | 47.532 | 45.949 | NA     | NA     | 30.463 | 30.826 | 13.072 | 14.209 | 12.511 | 12.482 | 59.368 | 56.296 |
| 272 | R | NA | NA | 49.687 | 47.827 | 31.188 | 30.190 | 30.847 | 34.097 | NA     | NA     | 39.705 | 39.540 | 27.952 | 29.822 | 11.847 | 13.585 | NA     | NA     | NA     | NA     |
| 273 | L | NA | NA | 51.005 | 51.775 | 32.474 | 31.892 | 36.708 | 40.984 | 48.868 | 53.185 | 34.636 | 37.943 | 32.925 | 32.171 | 11.736 | 13.582 | NA     | NA     | 63.682 | 62.700 |
| 273 | R | NA | NA | 53.585 | 53.277 | 29.245 | 29.634 | 37.580 | 40.979 | 49.933 | 52.562 | 35.283 | 38.383 | 31.234 | 30.983 | 13.039 | 12.410 | 10.588 | 11.337 | NA     | NA     |
| 274 | L | NA | NA | 49.462 | 48.326 | NA     | NA     | NA     | NA     | 54.124 | 51.109 | 35.161 | 36.580 | 24.272 | 26.728 | 12.236 | 12.971 | 21.370 | 21.017 | 61.348 | 61.949 |
| 274 | R | NA | NA | 51.077 | 50.801 | 26.430 | 26.426 | 36.508 | 35.672 | NA     | NA     | 38.791 | 35.252 | 24.903 | 26.793 | NA     | NA     | NA     | NA     | 56.521 | 57.772 |
| 275 | L | NA | NA | 48.768 | 46.698 | 28.685 | 28.115 | 33.471 | 33.471 | 41.000 | 44.961 | 32.903 | 37.499 | 27.756 | 27.958 | 11.674 | 11.537 | 10.407 | 11.622 | 65.527 | 67.287 |
| 275 | R | NA | NA | 48.794 | 49.116 | 30.564 | 30.609 | 33.253 | 33.253 | NA     | NA     | NA     | NA     | 26.883 | 29.359 | 11.890 | 11.485 | NA     | NA     | 61.991 | 58.187 |
| 276 | L | NA | NA | 45.381 | 44.617 | 29.665 | 31.347 | 41.888 | 41.678 | 58.251 | 55.045 | 41.162 | 42.321 | 28.597 | 29.900 | 13.207 | 12.630 | 13.915 | 13.915 | 65.338 | 67.991 |
| 276 | R | NA | NA | 42.814 | 42.294 | 30.636 | 31.808 | 42.672 | 38.035 | 55.389 | 54.091 | 42.299 | 40.440 | 31.936 | 32.550 | 14.185 | 14.252 | 7.817  | 7.817  | 65.835 | 62.233 |
| 277 | L | NA | NA | 50.714 | 53.291 | 27.231 | 27.255 | NA     | NA     | 40.070 | 39.179 | 32.958 | 37.428 | 27.954 | 29.194 | 18.609 | 19.283 | 10.263 | 11.300 | 58.087 | 59.518 |
| 277 | R | NA | NA | 47.669 | 47.523 | 26.154 | 25.294 | 39.092 | 39.111 | 45.809 | 45.622 | NA     | NA     | 28.990 | 28.699 | 15.096 | 16.001 | NA     | NA     | NA     | NA     |
| 279 | L | NA | NA | 49.812 | 49.639 | 32.057 | 32.057 | 42.074 | 41.459 | 41.647 | 41.851 | 39.178 | 40.337 | 25.625 | 26.244 | NA     | NA     | 14.377 | 12.889 | 58.511 | 61.014 |
| 279 | R | NA | NA | 49.121 | 49.034 | 31.831 | 33.767 | 40.429 | 42.347 | 43.722 | 45.083 | 40.814 | 40.536 | 29.946 | 29.907 | 12.986 | 14.087 | NA     | NA     | 63.063 | 61.519 |
| 280 | L | NA | NA | 47.146 | 46.194 | 26.479 | 25.809 | NA     | NA     | 48.702 | 46.876 | 30.071 | 33.957 | 32.925 | 29.882 | NA     | NA     | NA     | NA     | 68.018 | 67.113 |
| 280 | R | NA | NA | 49.569 | 48.636 | 28.896 | 27.333 | 33.349 | 36.564 | 47.952 | 47.356 | 32.292 | 32.290 | 29.890 | 30.074 | 8.960  | 11.058 | 10.106 | 8.794  | NA     | NA     |
| 281 | L | NA | NA | 51.714 | 53.120 | 33.640 | 32.039 | 42.610 | 41.893 | 45.291 | 41.078 | 35.333 | 39.642 | 29.882 | 29.968 | 12.960 | 13.731 | NA     | NA     | 64.264 | 63.414 |
| 281 | R | NA | NA | 50.683 | 50.761 | 34.246 | 36.146 | NA     | NA     | 42.746 | 39.104 | 39.982 | 35.427 | 26.905 | 26.903 | 13.231 | 12.812 | 8.549  | 11.733 | NA     | NA     |
| 282 | R | NA | NA | 51.303 | 47.519 | 26.314 | 26.626 | 38.512 | 37.375 | 49.394 | 48.293 | 38.989 | 35.853 | 29.297 | 29.417 | 11.809 | 10.716 | 10.324 | 11.771 | 51.060 | 52.389 |
| 283 | L | NA | NA | 44.998 | 43.854 | 23.811 | 27.510 | 38.185 | 37.357 | 44.609 | 44.213 | NA     | NA     | 31.458 | 30.825 | 20.800 | 19.060 | 12.640 | 15.089 | 62.188 | 55.555 |
| 283 | R | NA | NA | 44.270 | 43.388 | 23.383 | 25.200 | 35.809 | 36.270 | 41.724 | 45.650 | 32.949 | 36.818 | 32.214 | 30.580 | NA     | NA     | 11.908 | 13.044 | 54.341 | 53.812 |
| 284 | L | NA | NA | 48.883 | 49.668 | 31.426 | 30.032 | 40.964 | 41.079 | NA     | NA     | 37.657 | 38.548 | 29.630 | 29.045 | NA     | NA     | NA     | NA     | 60.826 | 61.991 |
| 284 | R | NA | NA | 48.971 | 48.851 | 31.531 | 32.723 | NA     | NA     | 42.183 | 45.950 | NA     | NA     | 28.212 | 27.949 | 11.781 | 13.408 | 6.452  | 9.047  | NA     | NA     |
| 285 | L | NA | NA | 53.106 | 54.524 | 33.597 | 32.074 | NA     | NA     | 53.969 | 54.213 | 35.213 | 37.735 | 30.594 | 29.597 | 8.538  | 10.567 | 21.295 | 23.577 | 61.993 | 59.876 |
| 285 | R | NA | NA | 49.897 | 51.810 | 34.153 | 35.690 | 40.484 | 41.097 | 45.676 | 48.693 | 32.030 | 34.273 | 33.034 | 32.874 | 10.225 | 7.908  | NA     | NA     | 60.724 | 65.989 |
| 287 | L | NA | NA | 50.759 | 51.117 | 27.594 | 28.147 | 38.052 | 38.693 | 44.565 | 45.453 | 34.882 | 37.837 | NA     | NA     | 8.172  | 8.098  | NA     | NA     | 66.203 | 65.015 |
| 287 | R | NA | NA | 57.008 | 54.632 | 33.228 | 31.556 | 35.986 | 37.403 | 47.620 | 50.330 | NA     | NA     | 28.117 | 28.923 | 14.679 | 14.271 | 9.055  | 9.358  | NA     | NA     |

|     |   |    |    |        |        |        |        |        |        |        |        |        |        |        |        |        |        |        |        |        |        |
|-----|---|----|----|--------|--------|--------|--------|--------|--------|--------|--------|--------|--------|--------|--------|--------|--------|--------|--------|--------|--------|
| 288 | L | NA | NA | 58.415 | 57.722 | 30.777 | 29.955 | 41.263 | 41.893 | NA     | NA     | 40.760 | 41.247 | 27.873 | 28.320 | 11.016 | 11.549 | NA     | NA     | 57.501 | 59.279 |
| 288 | R | NA | NA | 58.755 | 56.773 | 29.133 | 28.800 | 43.526 | 42.823 | 50.469 | 50.675 | 37.452 | 38.159 | NA     | NA     | 11.755 | 10.695 | 8.779  | 9.059  | NA     | NA     |
| 289 | R | NA | NA | 55.924 | 56.607 | 28.016 | 29.144 | 42.858 | 41.939 | 43.031 | 45.114 | NA     | NA     | 31.704 | 29.993 | 11.110 | 11.779 | 14.092 | 13.894 | 57.137 | 58.249 |
| 290 | L | NA | NA | 53.489 | 52.715 | 25.442 | 24.373 | 41.177 | 41.740 | 52.641 | 52.911 | 34.570 | 36.183 | 27.474 | 27.365 | 15.005 | 14.312 | 13.077 | 13.160 | 57.362 | 55.904 |
| 290 | R | NA | NA | 50.549 | 50.531 | 28.172 | 29.034 | 38.997 | 36.518 | 43.450 | 46.104 | NA     | NA     | NA     | NA     | 19.108 | 19.165 | NA     | NA     | NA     | NA     |
| 291 | R | NA | NA | 46.810 | 47.161 | 31.871 | 28.158 | 45.109 | 42.797 | 50.741 | 49.892 | 34.188 | 32.404 | 29.314 | 29.958 | 16.965 | 17.632 | 8.258  | 9.518  | NA     | NA     |
| 292 | L | NA | NA | 50.390 | 50.272 | 26.918 | 27.904 | 40.568 | 39.341 | 56.747 | 53.100 | 31.932 | 35.033 | 33.526 | 30.166 | 9.036  | 11.928 | 6.123  | 6.476  | 61.487 | 61.672 |
| 292 | R | NA | NA | 47.220 | 47.642 | 27.080 | 26.592 | 38.365 | 37.929 | 50.445 | 49.886 | NA     | NA     | 30.695 | 31.122 | 16.342 | 13.436 | 11.740 | 15.134 | 63.287 | 63.114 |
| 293 | L | NA | NA | 48.363 | 51.856 | 31.499 | 31.778 | 37.958 | 39.255 | 50.678 | 51.945 | 37.861 | 37.960 | 27.686 | 28.236 | 9.754  | 10.043 | NA     | NA     | 57.933 | 61.066 |
| 293 | R | NA | NA | 47.053 | 48.923 | NA     | NA     | 38.359 | 39.822 | 49.630 | 49.738 | NA     | NA     | 27.140 | 26.519 | 11.977 | 12.482 | 7.230  | 8.442  | NA     | NA     |
| 294 | L | NA | NA | 50.622 | 51.641 | 30.133 | 30.638 | 38.614 | 41.261 | NA     | NA     | 39.379 | 41.523 | 25.041 | 27.202 | 10.233 | 10.768 | NA     | NA     | NA     | NA     |
| 294 | R | NA | NA | 55.401 | 54.188 | 27.392 | 28.935 | 39.537 | 40.187 | 54.884 | 52.033 | 40.070 | 43.778 | 27.097 | 27.744 | 12.168 | 10.580 | 11.508 | 11.791 | 60.831 | 58.885 |
| 296 | L | NA | NA | 48.192 | 44.690 | 28.282 | 27.633 | NA     | NA     | 51.131 | 53.260 | 38.206 | 40.282 | 30.495 | 29.270 | 13.963 | 16.978 | NA     | NA     | 62.319 | 63.666 |
| 296 | R | NA | NA | 46.487 | 46.463 | 28.899 | 28.457 | 36.120 | 37.167 | 57.062 | 53.349 | 38.989 | 38.063 | 27.486 | 30.245 | 16.001 | 12.304 | 29.249 | 28.362 | 59.346 | 59.442 |
| 297 | L | NA | NA | 60.205 | 57.721 | 28.970 | 29.546 | 46.413 | 43.974 | NA     | NA     | 35.968 | 37.840 | 26.703 | 26.110 | 9.969  | 9.082  | NA     | NA     | 59.145 | 58.056 |
| 297 | R | NA | NA | 54.492 | 53.955 | 28.935 | 27.332 | 40.768 | 37.541 | 48.929 | 45.390 | 40.228 | 44.252 | 25.574 | 25.440 | 15.519 | 14.916 | 6.156  | 8.431  | 59.422 | 59.684 |
| 298 | L | NA | NA | 56.932 | 60.350 | 31.916 | 33.470 | 42.153 | 41.921 | 48.067 | 48.063 | 36.447 | 36.513 | 26.492 | 30.151 | 14.256 | 12.322 | 12.589 | 12.217 | 69.533 | 67.138 |
| 298 | R | NA | NA | 53.404 | 53.583 | 27.144 | 26.985 | 37.880 | 38.415 | NA     | NA     | 41.393 | 42.447 | 27.615 | 29.429 | 13.723 | 15.521 | NA     | NA     | NA     | NA     |
| 299 | L | NA | NA | 44.229 | 45.216 | NA     | NA     | 34.498 | 34.934 | 47.511 | 48.157 | 37.735 | 38.010 | 25.843 | 25.843 | 17.769 | 13.949 | 13.293 | 13.680 | 62.886 | 59.860 |
| 300 | L | NA | NA | 43.542 | 45.303 | 33.256 | 34.211 | 40.246 | 39.543 | 53.464 | 53.579 | NA     | NA     | 27.448 | 27.719 | 9.922  | 9.648  | 14.883 | 14.929 | 61.716 | 61.845 |
| 300 | R | NA | NA | 42.699 | 44.623 | 36.896 | 35.845 | 40.559 | 37.594 | NA     | NA     | 34.758 | 36.042 | 25.408 | 26.210 | 11.024 | 11.272 | 18.955 | 22.401 | 57.738 | 58.008 |
| 301 | L | NA | NA | 45.065 | 46.095 | 31.016 | 32.262 | 38.304 | 40.773 | 48.708 | 49.987 | 38.887 | 36.336 | 28.934 | 29.999 | 7.000  | 9.768  | 17.568 | 17.316 | 58.850 | 60.191 |
| 301 | R | NA | NA | 46.451 | 50.162 | 32.151 | 31.800 | NA     | NA     | NA     | NA     | NA     | NA     | 30.006 | 31.644 | 11.184 | 11.750 | 9.974  | 11.865 | NA     | NA     |
| 302 | L | NA | NA | 47.236 | 47.014 | NA     | NA     | 41.766 | 40.167 | 48.320 | 51.141 | 33.790 | 34.485 | 30.228 | 29.800 | 9.078  | 9.260  | 16.631 | 16.614 | 67.217 | 67.109 |
| 302 | R | NA | NA | 53.274 | 53.526 | 25.870 | 27.268 | 41.885 | 39.441 | 52.589 | 49.815 | 36.496 | 34.888 | 28.355 | 30.767 | 12.697 | 13.233 | NA     | NA     | 62.074 | 62.266 |
| 303 | L | NA | NA | 47.135 | 49.801 | 29.482 | 30.118 | 38.639 | 38.987 | NA     | NA     | NA     | NA     | 29.356 | 30.621 | 15.844 | 16.851 | 17.250 | 16.098 | 62.591 | 64.338 |
| 303 | R | NA | NA | 45.274 | 45.945 | 33.795 | 32.298 | NA     | NA     | 50.871 | 48.551 | 40.591 | 40.363 | NA     | NA     | 13.494 | 13.856 | 12.223 | 12.525 | NA     | NA     |
| 304 | L | NA | NA | 45.357 | 46.154 | NA     | NA     | 35.787 | 34.793 | 52.117 | 54.138 | 36.666 | 37.116 | 26.187 | 26.187 | 12.368 | 11.318 | 18.505 | 20.217 | 59.729 | 58.510 |
| 304 | R | NA | NA | 43.857 | 42.154 | 32.123 | 33.002 | 36.330 | 35.627 | 53.473 | 53.692 | 34.796 | 38.185 | 27.060 | 27.060 | 11.895 | 13.543 | 19.515 | 20.370 | 55.746 | 55.069 |
| 305 | L | NA | NA | 41.351 | 43.554 | 26.432 | 26.385 | 43.491 | 42.230 | 50.158 | 50.754 | 35.678 | 35.224 | 27.314 | 27.454 | 7.256  | 8.928  | 22.262 | 23.174 | 62.955 | 67.082 |
| 305 | R | NA | NA | 45.509 | 46.721 | 23.534 | 26.697 | 40.672 | 42.008 | 50.896 | 51.618 | NA     | NA     | 27.639 | 30.179 | 9.135  | 9.501  | 25.904 | 25.299 | 66.233 | 61.198 |

|     |   |    |    |        |        |        |        |        |        |        |        |        |        |        |        |        |        |        |        |        |        |
|-----|---|----|----|--------|--------|--------|--------|--------|--------|--------|--------|--------|--------|--------|--------|--------|--------|--------|--------|--------|--------|
| 306 | L | NA | NA | 42.341 | 46.150 | 26.443 | 26.606 | 36.308 | 35.765 | 55.781 | 56.167 | 37.260 | 37.595 | NA     | NA     | 19.588 | 18.081 | NA     | NA     | 60.634 | 62.204 |
| 306 | R | NA | NA | 45.528 | 45.765 | 24.871 | 26.555 | 36.563 | 35.900 | 55.485 | 55.199 | NA     | NA     | 28.327 | 27.121 | 16.718 | 19.416 | 16.174 | 16.698 | NA     | NA     |
| 307 | L | NA | NA | 46.390 | 48.102 | 32.523 | 30.201 | 36.718 | 35.231 | 49.265 | 50.658 | 44.295 | 45.860 | 31.231 | 30.762 | 16.214 | 16.811 | 14.234 | 14.260 | 63.598 | 63.253 |
| 307 | R | NA | NA | 44.893 | 46.598 | 33.396 | 34.284 | 37.817 | 39.333 | 46.758 | 47.152 | 42.975 | 44.692 | NA     | NA     | 11.552 | 10.806 | NA     | NA     | 60.498 | 66.435 |
| 308 | L | NA | NA | 51.656 | 53.289 | 31.150 | 33.129 | 33.776 | 37.253 | 54.319 | 56.769 | 33.989 | 33.301 | 24.980 | 25.599 | 17.322 | 16.152 | 15.911 | 17.470 | 66.555 | 66.505 |
| 309 | L | NA | NA | 44.491 | 48.514 | 27.640 | 28.756 | 40.853 | 39.155 | 52.915 | 51.617 | 32.390 | 31.452 | NA     | NA     | 10.232 | 10.837 | 15.451 | 15.325 | 60.950 | 61.033 |
| 309 | R | NA | NA | 52.827 | 56.041 | 27.039 | 28.575 | NA     | NA     | 52.112 | 50.462 | NA     | NA     | 27.009 | 27.796 | 10.043 | 10.390 | NA     | NA     | NA     | NA     |
| 310 | L | NA | NA | 46.091 | 47.531 | NA     | NA     | 36.061 | 35.940 | 50.925 | 51.850 | 32.755 | 31.886 | NA     | NA     | NA     | NA     | 21.357 | 23.535 | NA     | NA     |
| 310 | R | NA | NA | 46.552 | 45.318 | 29.554 | 29.256 | 32.830 | 36.685 | 51.551 | 51.495 | NA     | NA     | 31.522 | 34.219 | 5.975  | 4.894  | 21.694 | 21.043 | 56.476 | 59.743 |
| 311 | R | NA | NA | 44.225 | 46.202 | NA     | NA     | NA     | NA     | 56.903 | 56.380 | 37.882 | 33.794 | 32.305 | 34.155 | 9.711  | 9.711  | 11.550 | 12.600 | 58.591 | 59.412 |
| 312 | L | NA | NA | 51.925 | 46.984 | 28.618 | 27.440 | 35.144 | 36.779 | 53.700 | 55.610 | 43.980 | 41.728 | 30.507 | 29.596 | 11.309 | 12.530 | 10.881 | 12.470 | 60.953 | 62.137 |
| 312 | R | NA | NA | 50.718 | 50.002 | 23.977 | 24.638 | 33.393 | 33.906 | NA     | NA     | NA     | NA     | 25.326 | 25.032 | 10.425 | 11.200 | NA     | NA     | 56.243 | 58.710 |
| 313 | L | NA | NA | 48.301 | 49.369 | NA     | NA     | 38.349 | 38.775 | 51.094 | 53.432 | 32.647 | 31.305 | 27.564 | 27.686 | 11.385 | 12.644 | 20.191 | 22.649 | 73.035 | 69.643 |
| 313 | R | NA | NA | 45.889 | 47.018 | 28.481 | 31.988 | 35.379 | 35.854 | 55.692 | 56.563 | 35.701 | 37.881 | NA     | NA     | 12.220 | 14.663 | 15.535 | 15.229 | NA     | NA     |
| 315 | L | NA | NA | 47.453 | 49.016 | 27.242 | 27.415 | 32.390 | 31.970 | 52.521 | 52.593 | 39.074 | 39.089 | 25.728 | 28.555 | 8.070  | 9.958  | 24.593 | 23.954 | 65.479 | 64.715 |
| 315 | R | NA | NA | 40.275 | 44.224 | 27.534 | 29.226 | NA     | NA     | 52.360 | 54.147 | NA     | NA     | 27.246 | 28.590 | 10.694 | 8.848  | 21.367 | 21.818 | 63.097 | 63.007 |
| 316 | L | NA | NA | 48.889 | 48.603 | 30.770 | 33.163 | 37.649 | 38.049 | 48.546 | 47.889 | 34.697 | 38.598 | NA     | NA     | 9.668  | 9.668  | 13.849 | 14.723 | NA     | NA     |
| 316 | R | NA | NA | 49.606 | 49.411 | 29.440 | 31.056 | 35.471 | 36.478 | 55.285 | 57.285 | NA     | NA     | 23.342 | 25.077 | 11.404 | 11.404 | 19.139 | 18.772 | 58.244 | 59.109 |
| 317 | L | NA | NA | 48.820 | 51.022 | 32.133 | 32.862 | 39.643 | 39.369 | 57.828 | 59.267 | 42.649 | 43.600 | 26.371 | 26.796 | 10.510 | 11.194 | NA     | NA     | 62.921 | 63.754 |
| 317 | R | NA | NA | 50.344 | 51.696 | 29.045 | 31.154 | 41.043 | 38.477 | 56.302 | 55.852 | 41.383 | 43.357 | 25.348 | 26.026 | 16.473 | 15.307 | 15.869 | 18.251 | 59.699 | 60.775 |
| 318 | L | NA | NA | 46.378 | 46.877 | 24.651 | 25.021 | 36.790 | 33.842 | 48.840 | 48.847 | 44.777 | 41.180 | 27.217 | 27.217 | 10.088 | 11.574 | 19.622 | 19.501 | NA     | NA     |
| 318 | R | NA | NA | 45.278 | 47.238 | 27.419 | 29.675 | 35.474 | 34.893 | NA     | NA     | NA     | NA     | 25.415 | 26.684 | 10.312 | 12.457 | NA     | NA     | 64.460 | 64.062 |
| 319 | L | NA | NA | 44.506 | 48.402 | 29.911 | 32.322 | 35.568 | 35.878 | 45.711 | 45.147 | 37.541 | 37.905 | 29.550 | 28.814 | 11.983 | 12.928 | 12.858 | 14.335 | NA     | NA     |
| 319 | R | NA | NA | 44.930 | 48.452 | NA     | NA     | 32.084 | 31.715 | 45.651 | 45.472 | 39.563 | 40.154 | 26.287 | 28.522 | NA     | NA     | 21.108 | 22.871 | 58.718 | 56.952 |
| 320 | L | NA | NA | 44.045 | 47.116 | 29.850 | 31.473 | 38.487 | 41.249 | 46.361 | 46.468 | 35.198 | 33.862 | 28.033 | 25.758 | 16.261 | 16.849 | 20.355 | 19.972 | 66.334 | 63.997 |
| 320 | R | NA | NA | 49.530 | 49.574 | 29.544 | 30.523 | NA     | NA     | 40.600 | 42.415 | 35.885 | 38.581 | NA     | NA     | NA     | NA     | 17.286 | 20.852 | NA     | NA     |
| 322 | L | NA | NA | 47.705 | 50.791 | 29.764 | 31.364 | 43.071 | 44.933 | 51.335 | 50.983 | NA     | NA     | NA     | NA     | 12.430 | 12.433 | 16.751 | 18.167 | NA     | NA     |
| 322 | R | NA | NA | 41.216 | 45.153 | 27.297 | 28.942 | NA     | NA     | 49.442 | 51.411 | 45.364 | 45.707 | 26.528 | 28.058 | NA     | NA     | NA     | NA     | 57.281 | 55.577 |
| 323 | R | NA | NA | 42.856 | 45.101 | 31.504 | 31.504 | 35.451 | 31.990 | NA     | NA     | 41.367 | 42.966 | 30.481 | 34.358 | 14.551 | 12.202 | NA     | NA     | NA     | NA     |
| 324 | R | NA | NA | 44.241 | 48.093 | 26.928 | 25.575 | NA     | NA     | 50.373 | 47.481 | 45.051 | 46.062 | NA     | NA     | 17.419 | 17.078 | 24.600 | 24.858 | 58.725 | 60.184 |
| 325 | L | NA | NA | 49.247 | 44.695 | NA     | NA     | 35.918 | 37.950 | 48.272 | 50.576 | 40.709 | 41.111 | 30.013 | 27.034 | 8.098  | 11.391 | 11.661 | 12.476 | 65.306 | 63.616 |

|     |   |    |    |        |        |        |        |        |        |        |        |        |        |        |        |        |        |        |        |        |        |
|-----|---|----|----|--------|--------|--------|--------|--------|--------|--------|--------|--------|--------|--------|--------|--------|--------|--------|--------|--------|--------|
| 325 | R | NA | NA | 44.769 | 43.584 | 29.379 | 30.857 | 36.051 | 35.293 | NA     | NA     | 40.352 | 37.672 | 32.603 | 32.426 | 11.732 | 15.177 | 11.180 | 11.770 | NA     | NA     |
| 326 | L | NA | NA | 50.104 | 46.121 | 26.906 | 29.660 | 38.762 | 38.126 | 50.204 | 52.200 | 39.264 | 41.708 | 23.187 | 23.665 | 10.302 | 12.493 | 12.195 | 14.047 | 56.332 | 57.034 |
| 326 | R | NA | NA | 49.503 | 46.316 | 25.784 | 26.517 | 38.771 | 37.708 | 49.142 | 50.073 | 39.990 | 43.252 | 23.968 | 22.825 | 13.703 | 14.198 | NA     | NA     | 52.613 | 52.544 |
| 327 | L | NA | NA | 51.370 | 48.375 | 28.859 | 27.661 | 33.412 | 32.680 | 51.567 | 52.014 | 28.211 | 29.515 | 29.280 | 29.111 | NA     | NA     | 9.376  | 12.961 | NA     | NA     |
| 327 | R | NA | NA | 52.981 | 50.320 | 25.703 | 26.033 | 34.477 | 35.579 | 46.990 | 48.405 | NA     | NA     | NA     | NA     | 8.621  | 8.302  | NA     | NA     | 68.992 | 68.240 |
| 328 | L | NA | NA | 47.792 | 47.780 | 33.568 | 32.319 | 39.113 | 39.632 | 48.870 | 48.482 | 32.027 | 33.220 | 30.715 | 30.804 | 7.974  | 8.031  | 13.410 | 13.833 | 60.316 | 59.253 |
| 328 | R | NA | NA | 44.293 | 44.180 | 28.123 | 25.956 | 37.307 | 38.035 | 47.923 | 49.605 | NA     | NA     | 29.454 | 29.894 | 12.968 | 14.403 | 13.708 | 11.509 | 64.272 | 59.651 |
| 330 | L | NA | NA | 47.836 | 48.315 | 31.365 | 31.897 | 30.902 | 32.573 | 45.686 | 46.918 | 28.322 | 28.006 | 27.364 | 27.923 | 10.919 | 10.342 | 9.512  | 10.623 | 61.889 | 58.394 |
| 330 | R | NA | NA | 50.266 | 50.132 | 31.276 | 32.736 | NA     | NA     | NA     | NA     | NA     | NA     | 27.618 | 29.487 | 4.402  | 4.472  | NA     | NA     | 62.023 | 59.713 |
| 331 | L | NA | NA | 44.305 | 47.012 | 25.873 | 27.021 | 32.016 | 35.368 | 50.228 | 53.023 | 28.845 | 28.763 | 29.761 | 30.624 | 13.800 | 13.193 | 15.229 | 16.458 | 57.310 | 60.974 |
| 332 | L | NA | NA | 48.935 | 47.974 | NA     | NA     | NA     | NA     | 50.434 | 51.276 | 28.291 | 27.749 | 30.416 | 29.998 | 12.792 | 15.555 | 19.077 | 19.374 | 63.199 | 60.569 |
| 332 | R | NA | NA | 49.177 | 47.172 | 29.292 | 31.447 | 37.991 | 33.967 | NA     | NA     | NA     | NA     | 32.295 | 32.948 | NA     | NA     | 15.216 | 15.949 | NA     | NA     |
| 333 | L | NA | NA | 46.830 | 45.214 | 26.380 | 27.862 | 36.488 | 33.077 | 47.939 | 48.890 | NA     | NA     | 29.910 | 32.587 | 12.790 | 10.417 | 18.011 | 20.168 | 73.326 | 69.708 |
| 333 | R | NA | NA | 46.297 | 42.022 | 23.746 | 25.348 | 37.223 | 33.808 | NA     | NA     | 40.393 | 38.671 | 31.387 | 31.682 | NA     | NA     | NA     | NA     | 61.410 | 60.985 |
| 334 | L | NA | NA | 47.075 | 46.173 | 18.970 | 22.290 | 38.863 | 38.393 | 51.242 | 52.251 | 29.085 | 29.147 | 29.210 | 31.080 | 12.099 | 12.423 | 14.536 | 14.625 | 59.214 | 58.199 |
| 334 | R | NA | NA | 48.436 | 44.505 | NA     | NA     | 36.151 | 36.328 | NA     | NA     | 35.233 | 34.724 | 29.968 | 31.862 | 11.994 | 12.866 | 11.443 | 12.580 | 53.610 | 54.740 |
| 335 | L | NA | NA | 45.642 | 43.648 | NA     | NA     | 38.201 | 36.460 | 50.006 | 50.207 | 28.350 | 28.108 | 28.167 | 29.299 | 11.655 | 12.920 | 19.188 | 18.404 | 63.997 | 64.829 |
| 336 | L | NA | NA | 53.338 | 49.595 | 21.946 | 21.564 | 34.931 | 36.630 | 51.926 | 52.651 | 25.147 | 24.807 | 30.598 | 32.875 | 11.069 | 10.471 | 18.548 | 21.473 | 61.894 | 60.663 |
| 336 | R | NA | NA | 46.939 | 44.622 | 21.829 | 23.562 | 34.773 | 33.977 | 48.720 | 46.777 | NA     | NA     | 32.130 | 33.532 | NA     | NA     | 24.079 | 21.316 | 58.651 | 59.717 |
| 337 | R | NA | NA | 52.765 | 52.224 | 17.358 | 21.125 | 32.339 | 35.540 | 53.017 | 52.118 | NA     | NA     | 33.301 | 35.182 | 14.348 | 16.209 | 20.735 | 22.070 | NA     | NA     |
| 338 | R | NA | NA | 41.774 | 41.002 | 27.553 | 27.100 | 39.432 | 39.598 | 50.349 | 50.699 | NA     | NA     | 32.343 | 32.854 | 11.226 | 10.878 | NA     | NA     | 57.591 | 58.018 |
| 339 | L | NA | NA | 54.001 | 50.153 | 17.788 | 20.510 | 39.851 | 40.161 | 56.401 | 61.614 | 28.211 | 27.603 | 27.948 | 30.246 | 10.124 | 10.968 | 18.979 | 19.395 | 62.525 | 65.651 |
| 339 | R | NA | NA | 51.006 | 49.845 | 18.810 | 19.228 | 37.251 | 39.698 | NA     | NA     | NA     | NA     | 27.287 | 26.684 | 11.259 | 11.851 | NA     | NA     | NA     | NA     |
| 340 | L | NA | NA | 48.418 | 47.464 | 19.937 | 20.698 | 37.023 | 36.802 | 49.836 | 49.453 | NA     | NA     | NA     | NA     | 7.460  | 8.121  | 21.127 | 19.016 | 64.485 | 65.254 |
| 340 | R | NA | NA | 40.977 | 37.392 | 23.282 | 23.042 | NA     | NA     | NA     | NA     | 42.093 | 43.532 | 27.915 | 26.753 | NA     | NA     | NA     | NA     | 64.625 | 64.677 |
| 341 | R | NA | NA | 48.401 | 46.991 | 23.001 | 25.015 | NA     | NA     | 45.083 | 47.243 | NA     | NA     | 27.442 | 29.002 | 12.482 | 13.749 | 13.260 | 11.525 | 54.298 | 51.887 |
| 342 | R | NA | NA | 50.567 | 51.493 | 21.636 | 21.733 | 32.753 | 32.727 | 48.371 | 48.134 | NA     | NA     | NA     | NA     | 12.647 | 14.583 | NA     | NA     | NA     | NA     |
| 343 | R | NA | NA | 46.918 | 42.604 | 23.534 | 21.579 | 32.673 | 36.641 | 50.411 | 53.749 | 34.846 | 36.174 | 31.118 | 30.428 | 11.349 | 11.780 | NA     | NA     | 64.428 | 64.833 |
| 344 | R | NA | NA | 48.380 | 44.257 | 23.117 | 22.289 | 33.464 | 34.756 | NA     | NA     | NA     | NA     | 28.109 | 31.185 | NA     | NA     | NA     | NA     | 60.584 | 62.324 |
| 345 | R | NA | NA | 45.761 | 43.774 | 23.348 | 24.113 | 35.991 | 36.314 | NA     | NA     | NA     | NA     | 30.088 | 30.557 | 15.524 | 17.530 | 11.318 | 11.567 | 61.782 | 61.850 |
| 346 | L | NA | NA | 46.487 | 45.108 | 21.556 | 22.761 | 38.206 | 37.602 | 45.294 | 31.826 | 25.343 | 24.226 | 30.245 | 29.870 | 10.563 | 12.174 | 14.443 | 15.401 | 62.683 | 62.811 |

|     |   |    |    |        |        |        |        |        |        |        |        |        |        |        |        |        |        |        |        |        |        |
|-----|---|----|----|--------|--------|--------|--------|--------|--------|--------|--------|--------|--------|--------|--------|--------|--------|--------|--------|--------|--------|
| 346 | R | NA | NA | 47.993 | 45.845 | 22.312 | 23.686 | 37.103 | 35.202 | 41.144 | 40.874 | NA     | NA     | 29.803 | 31.345 | NA     | NA     | 11.203 | 14.077 | 58.258 | 58.795 |
| 347 | L | NA | NA | 51.065 | 49.337 | 29.267 | 30.227 | 47.020 | 42.430 | 50.335 | 47.196 | 29.208 | 29.636 | 31.211 | 30.671 | 10.085 | 10.947 | 19.951 | 17.623 | 64.251 | 67.956 |
| 347 | R | NA | NA | 44.866 | 44.535 | 32.124 | 32.224 | 43.060 | 40.080 | 47.582 | 45.184 | 36.126 | 37.281 | 26.163 | 27.635 | 13.195 | 14.641 | 14.098 | 12.938 | NA     | NA     |
| 348 | L | NA | NA | 48.950 | 45.177 | 26.396 | 27.718 | 42.799 | 43.335 | 49.341 | 49.077 | 32.383 | 31.824 | 28.423 | 29.165 | 11.559 | 13.413 | NA     | NA     | 63.297 | 61.875 |
| 349 | L | NA | NA | 48.514 | 44.488 | 26.265 | 24.002 | 38.419 | 39.868 | 52.301 | 50.856 | 27.167 | 27.977 | 28.933 | 29.964 | NA     | NA     | 12.430 | 12.939 | 64.915 | 63.687 |
| 349 | R | NA | NA | 49.106 | 46.606 | 26.383 | 26.817 | 38.718 | 39.517 | 47.817 | 48.623 | NA     | NA     | 30.475 | 30.667 | 13.554 | 13.939 | 16.481 | 20.286 | 66.104 | 60.902 |
| 350 | L | NA | NA | 43.939 | 43.017 | 21.198 | 22.934 | 42.827 | 39.482 | NA     | NA     | 28.642 | 29.669 | 34.726 | 31.966 | 13.550 | 14.570 | 12.165 | 12.808 | 62.230 | 61.489 |
| 350 | R | NA | NA | 51.855 | 47.654 | NA     | NA     | 38.443 | 41.362 | 50.973 | 53.870 | NA     | NA     | 33.170 | 32.272 | NA     | NA     | 19.891 | 22.699 | 60.667 | 60.562 |
| 351 | L | NA | NA | 47.988 | 44.048 | 24.915 | 24.537 | 43.299 | 42.216 | 49.379 | 53.491 | 30.026 | 30.842 | 26.236 | 27.435 | 10.222 | 11.817 | 9.133  | 8.408  | 65.024 | 64.193 |
| 351 | R | NA | NA | 50.649 | 47.197 | 24.276 | 23.966 | 35.310 | 37.335 | 50.169 | 51.370 | 38.697 | 38.519 | 25.946 | 25.913 | 11.647 | 14.609 | 14.490 | 13.683 | 61.979 | 63.193 |
| 352 | R | NA | NA | 46.856 | 44.864 | 22.574 | 21.218 | 36.311 | 38.183 | NA     | NA     | 40.192 | 41.855 | 27.249 | 26.043 | 10.002 | 10.842 | 18.763 | 19.148 | 61.423 | 61.521 |
| 353 | L | NA | NA | 48.207 | 44.389 | 24.549 | 23.294 | 36.552 | 37.523 | 45.476 | 46.157 | 32.848 | 33.477 | 29.789 | 30.257 | 12.934 | 14.927 | 9.591  | 8.116  | 42.173 | 33.600 |
| 353 | R | NA | NA | 46.324 | 42.286 | 24.973 | 25.377 | 35.927 | 35.726 | NA     | NA     | 40.280 | 39.446 | 28.356 | 29.253 | 13.762 | 14.697 | 9.023  | 7.890  | 40.870 | 39.066 |
| 354 | L | NA | NA | 46.119 | 44.243 | 22.120 | 23.921 | 46.117 | 45.121 | 49.916 | 51.129 | 34.847 | 35.657 | 29.859 | 30.102 | 7.460  | 8.990  | 15.073 | 14.742 | 55.141 | 46.432 |
| 354 | R | NA | NA | 46.829 | 47.903 | 22.512 | 22.885 | 44.096 | 42.325 | 48.233 | 48.847 | NA     | NA     | 33.154 | 33.042 | 10.314 | 9.535  | NA     | NA     | 41.334 | 42.187 |
| 357 | R | NA | NA | 49.169 | 49.342 | 19.473 | 22.053 | 40.703 | 38.278 | 47.799 | 48.135 | 38.185 | 38.640 | 32.639 | 34.652 | 8.930  | 9.808  | 15.376 | 14.967 | NA     | NA     |
| 358 | L | NA | NA | 43.217 | 42.455 | 23.613 | 24.161 | 39.563 | 42.372 | 46.806 | 49.802 | 27.318 | 28.053 | 26.279 | 26.843 | 16.423 | 18.360 | 14.952 | 12.795 | 46.864 | 44.575 |
| 358 | R | NA | NA | 44.649 | 45.396 | 18.005 | 20.241 | 36.498 | 36.344 | NA     | NA     | 36.983 | 36.247 | 27.334 | 28.110 | 12.926 | 11.813 | 11.588 | 11.662 | 44.793 | 43.246 |
| 359 | L | NA | NA | 51.536 | 51.089 | 22.948 | 26.372 | 37.585 | 39.811 | 49.029 | 50.607 | 33.325 | 33.503 | 29.675 | 30.683 | 10.461 | 12.425 | 20.266 | 20.730 | 53.344 | 54.768 |
| 360 | L | NA | NA | 43.963 | 41.768 | NA     | NA     | 39.193 | 39.543 | 51.588 | 51.507 | 39.098 | 42.380 | 24.567 | 25.447 | 10.681 | 12.080 | 14.582 | 15.541 | 39.363 | 39.383 |
| 360 | R | NA | NA | 43.366 | 42.682 | 25.706 | 26.390 | NA     | NA     | 52.888 | 50.734 | NA     | NA     | 25.121 | 25.653 | 14.819 | 15.810 | 14.780 | 14.043 | 47.857 | 46.985 |
| 361 | L | NA | NA | 43.609 | 43.280 | 21.842 | 25.305 | 40.502 | 42.840 | 48.508 | 49.192 | 30.365 | 29.245 | 28.689 | 25.615 | 6.675  | 10.211 | 14.411 | 15.626 | 46.619 | 52.344 |
| 361 | R | NA | NA | 47.708 | 46.579 | 17.713 | 19.797 | 46.206 | 47.548 | 47.773 | 50.463 | NA     | NA     | 25.764 | 25.796 | NA     | NA     | 22.278 | 22.683 | 39.501 | 41.432 |
| 362 | R | NA | NA | 48.008 | 44.908 | 22.096 | 23.804 | 38.123 | 37.985 | 47.965 | 46.653 | 36.215 | 36.808 | 30.691 | 28.504 | NA     | NA     | 11.719 | 11.860 | 50.304 | 43.241 |
| 363 | L | NA | NA | 48.910 | 49.625 | 26.029 | 27.994 | 35.717 | 35.128 | 53.537 | 54.589 | 31.095 | 30.211 | 29.224 | 29.410 | 11.009 | 14.400 | 15.403 | 15.263 | 47.470 | 46.459 |
| 363 | R | NA | NA | 49.217 | 49.966 | 23.320 | 25.758 | 35.224 | 36.279 | NA     | NA     | NA     | NA     | 27.496 | 27.078 | 9.207  | 12.167 | 13.991 | 13.452 | 42.831 | 44.846 |
| 364 | L | NA | NA | 42.332 | 42.962 | 22.466 | 25.465 | NA     | NA     | 50.449 | 48.669 | 32.831 | 32.330 | 26.997 | 23.427 | 12.364 | 12.813 | 19.065 | 19.141 | NA     | NA     |
| 364 | R | NA | NA | 43.987 | 42.147 | 24.047 | 25.327 | 42.274 | 41.568 | 51.657 | 49.420 | NA     | NA     | 24.466 | 24.748 | 19.276 | 19.558 | NA     | NA     | 42.789 | 45.428 |
| 366 | L | NA | NA | 52.312 | 54.395 | 17.050 | 17.050 | NA     | NA     | 46.586 | 47.565 | 28.526 | 27.651 | 33.388 | 33.127 | 13.459 | 14.242 | 21.688 | 20.024 | NA     | NA     |
| 367 | L | NA | NA | 45.835 | 44.746 | 20.235 | 20.531 | 37.789 | 37.542 | 51.032 | 51.572 | 30.794 | 30.006 | 32.422 | 32.332 | 7.882  | 8.720  | 24.063 | 22.156 | 55.977 | 51.819 |
| 367 | R | NA | NA | 42.950 | 42.195 | NA     | NA     | 35.755 | 35.579 | 50.509 | 51.037 | 41.432 | 40.946 | 32.202 | 31.179 | 11.938 | 10.392 | 19.918 | 22.311 | NA     | NA     |

|     |   |    |    |        |        |        |        |        |        |        |        |        |        |        |        |        |        |        |        |        |        |
|-----|---|----|----|--------|--------|--------|--------|--------|--------|--------|--------|--------|--------|--------|--------|--------|--------|--------|--------|--------|--------|
| 368 | L | NA | NA | 52.637 | 52.289 | 19.647 | 22.642 | 39.348 | 39.948 | 52.333 | 52.488 | 33.585 | 33.124 | 27.147 | 27.411 | NA     | NA     | 13.960 | 13.816 | 50.678 | 56.783 |
| 368 | R | NA | NA | 51.272 | 50.229 | 23.746 | 25.312 | 39.279 | 37.808 | NA     | NA     | 37.390 | 36.297 | 28.260 | 28.631 | 7.192  | 7.623  | 13.727 | 13.733 | 48.452 | 56.105 |
| 369 | R | NA | NA | 49.671 | 49.669 | 22.939 | 25.526 | 38.881 | 39.397 | 47.960 | 46.993 | NA     | NA     | NA     | NA     | 16.101 | 13.856 | 17.320 | 17.877 | 35.839 | 35.056 |
| 370 | L | NA | NA | 53.606 | 51.392 | NA     | NA     | 39.502 | 38.212 | 50.161 | 51.341 | 26.311 | 25.878 | 30.109 | 33.853 | 11.669 | 11.113 | 19.878 | 19.637 | 48.818 | 46.052 |
| 370 | R | NA | NA | 48.801 | 46.762 | 22.198 | 25.945 | 38.801 | 37.531 | 48.961 | 48.739 | NA     | NA     | 30.679 | 29.177 | 20.809 | 20.541 | 21.717 | 23.244 | 41.490 | 48.367 |
| 371 | L | NA | NA | 42.612 | 44.422 | 24.304 | 26.704 | 39.120 | 40.903 | 47.493 | 49.229 | 30.164 | 29.731 | 28.097 | 26.376 | 14.334 | 13.437 | 22.774 | 22.472 | 43.896 | 40.053 |
| 371 | R | NA | NA | 40.065 | 40.688 | NA     | NA     | 36.470 | 37.113 | NA     | NA     | NA     | NA     | 26.647 | 26.350 | NA     | NA     | NA     | NA     | 39.091 | 42.541 |
| 372 | R | NA | NA | 46.254 | 44.435 | 17.788 | 17.788 | NA     | NA     | 54.268 | 53.793 | 36.169 | 34.950 | 28.209 | 28.103 | NA     | NA     | NA     | NA     | 36.926 | 36.469 |
| 373 | L | NA | NA | 56.088 | 51.702 | 22.254 | 23.042 | 35.059 | 36.503 | 50.301 | 50.623 | 30.018 | 29.425 | 32.398 | 31.973 | 11.899 | 13.293 | 13.943 | 13.491 | 43.632 | 37.212 |
| 373 | R | NA | NA | 47.726 | 47.568 | NA     | NA     | 33.607 | 34.640 | NA     | NA     | NA     | NA     | 32.845 | 30.872 | NA     | NA     | 23.613 | 24.090 | 40.188 | 47.061 |
| 374 | L | NA | NA | 49.129 | 47.238 | 32.206 | 30.907 | 38.927 | 38.566 | 54.995 | 55.599 | 28.069 | 26.515 | 30.846 | 29.614 | 10.407 | 12.108 | 15.295 | 15.387 | 43.217 | 40.438 |
| 374 | R | NA | NA | 47.725 | 46.695 | 34.386 | 35.297 | 33.214 | 32.756 | 52.335 | 52.430 | NA     | NA     | 31.506 | 30.931 | NA     | NA     | 16.612 | 16.751 | 42.154 | 44.833 |
| 376 | L | NA | NA | 46.574 | 45.092 | 25.197 | 25.533 | 35.904 | 35.264 | 53.313 | 54.251 | 30.440 | 32.604 | 29.745 | 29.384 | 7.781  | 8.567  | 19.926 | 18.607 | 36.547 | 36.547 |
| 376 | R | NA | NA | 43.903 | 43.012 | NA     | NA     | NA     | NA     | NA     | NA     | 35.445 | 35.053 | 29.812 | 29.622 | 9.941  | 10.168 | NA     | NA     | 39.294 | 39.294 |
| 377 | L | NA | NA | 49.757 | 48.068 | 24.447 | 23.651 | 41.222 | 41.011 | 48.676 | 48.214 | 33.487 | 32.811 | 25.161 | 24.654 | 11.129 | 9.794  | 15.106 | 19.259 | NA     | NA     |
| 377 | R | NA | NA | 45.519 | 43.980 | 22.280 | 19.478 | 41.269 | 39.557 | 47.101 | 47.936 | 37.788 | 39.122 | 26.593 | 27.691 | NA     | NA     | 21.987 | 21.198 | 36.267 | 43.835 |
| 378 | L | NA | NA | 55.219 | 55.587 | NA     | NA     | 40.874 | 41.301 | 48.852 | 48.628 | 31.374 | 30.377 | 28.744 | 28.512 | NA     | NA     | NA     | NA     | 41.002 | 43.016 |
| 378 | R | NA | NA | 52.368 | 54.075 | 20.542 | 22.871 | 40.652 | 41.691 | 52.505 | 49.600 | 41.846 | 40.082 | 30.964 | 30.417 | 5.504  | 7.134  | 15.244 | 13.766 | 39.867 | 36.413 |
| 379 | R | NA | NA | 52.045 | 55.129 | NA     | NA     | NA     | NA     | 51.306 | 49.432 | 42.706 | 40.972 | 31.826 | 30.918 | 13.476 | 13.485 | 13.695 | 13.419 | 39.175 | 43.836 |
| 380 | L | NA | NA | 49.551 | 50.003 | 22.537 | 25.678 | 43.399 | 44.253 | 49.905 | 50.336 | 32.215 | 33.178 | 30.471 | 29.283 | 12.731 | 12.735 | 14.185 | 15.312 | 37.183 | 39.911 |
| 380 | R | NA | NA | 54.412 | 54.262 | 21.283 | 24.567 | 41.291 | 41.947 | NA     | NA     | 38.389 | 37.691 | 31.014 | 30.002 | 15.503 | 13.800 | 16.387 | 17.630 | 43.887 | 47.351 |
| 381 | L | NA | NA | 47.450 | 48.139 | 17.061 | 17.061 | 41.490 | 40.878 | 52.081 | 50.506 | 35.002 | 35.632 | 31.412 | 30.619 | 8.673  | 7.329  | 14.926 | 15.312 | 32.590 | 32.590 |
| 381 | R | NA | NA | 50.231 | 49.698 | 19.954 | 23.462 | 36.154 | 35.946 | NA     | NA     | 38.475 | 39.383 | 32.022 | 31.783 | 13.589 | 13.076 | 15.242 | 16.892 | 50.009 | 50.009 |
| 382 | L | NA | NA | 49.392 | 48.387 | 33.119 | 31.907 | 41.180 | 43.124 | 50.328 | 51.658 | 29.252 | 29.759 | 27.051 | 27.151 | 10.227 | 9.834  | 16.046 | 15.960 | 40.767 | 54.314 |
| 382 | R | NA | NA | 51.270 | 49.532 | 31.309 | 32.524 | 40.378 | 41.035 | 48.945 | 49.658 | NA     | NA     | 29.511 | 28.727 | 15.027 | 15.010 | 13.433 | 21.516 | NA     | NA     |
| 383 | R | NA | NA | 50.277 | 47.067 | 21.903 | 22.938 | NA     | NA     | 42.457 | 42.155 | NA     | NA     | 30.828 | 30.535 | 11.440 | 12.656 | 22.999 | 21.160 | 51.522 | 62.782 |
| 384 | L | NA | NA | 41.201 | 40.366 | 24.125 | 27.281 | 47.230 | 47.141 | NA     | NA     | 29.316 | 28.394 | 28.793 | 28.389 | 9.403  | 7.250  | 19.528 | 19.238 | NA     | NA     |
| 384 | R | NA | NA | 39.772 | 40.871 | 24.765 | 28.592 | 42.213 | 41.799 | 54.457 | 54.407 | NA     | NA     | 28.073 | 28.839 | 13.051 | 12.916 | 19.188 | 15.464 | 38.734 | 42.145 |
| 386 | L | NA | NA | 48.222 | 49.122 | 24.647 | 23.697 | 39.667 | 40.033 | 49.828 | 49.216 | 31.122 | 31.476 | 28.921 | 27.131 | 12.649 | 12.211 | 25.448 | 22.900 | 43.822 | 42.919 |
| 386 | R | NA | NA | 48.361 | 48.788 | 30.149 | 27.638 | 37.242 | 38.105 | 48.344 | 48.262 | NA     | NA     | 28.730 | 26.540 | 11.224 | 12.034 | 21.196 | 21.175 | NA     | NA     |
| 387 | R | NA | NA | 52.252 | 50.597 | NA     | NA     | 36.512 | 36.522 | 51.768 | 51.317 | 38.737 | 41.141 | 24.915 | 25.606 | 11.487 | 10.787 | 12.122 | 13.460 | 45.397 | 43.931 |

|     |   |    |    |        |        |        |        |        |        |        |        |        |        |        |        |        |        |        |        |        |        |
|-----|---|----|----|--------|--------|--------|--------|--------|--------|--------|--------|--------|--------|--------|--------|--------|--------|--------|--------|--------|--------|
| 388 | L | NA | NA | 53.766 | 54.791 | NA     | NA     | 39.778 | 39.319 | 51.007 | 53.379 | NA     | NA     | 27.823 | 27.981 | 16.265 | 15.680 | 21.818 | 15.307 | 40.070 | 39.699 |
| 388 | R | NA | NA | 48.923 | 50.568 | 24.581 | 27.264 | NA     | NA     | NA     | NA     | 37.510 | 38.216 | NA     | NA     | 11.851 | 12.720 | 15.343 | 13.785 | 36.201 | 41.568 |
| 389 | L | NA | NA | 47.862 | 49.582 | 21.627 | 24.684 | NA     | NA     | NA     | NA     | 28.784 | 28.979 | 28.523 | 28.632 | 14.062 | 10.988 | NA     | NA     | 49.896 | 52.028 |
| 389 | R | NA | NA | 49.876 | 47.345 | 24.028 | 24.765 | 39.386 | 36.975 | 51.636 | 52.287 | NA     | NA     | NA     | NA     | 11.932 | 13.962 | 18.867 | 19.852 | 45.867 | 45.626 |
| 390 | L | NA | NA | 40.110 | 40.631 | 27.825 | 29.965 | NA     | NA     | 50.823 | 53.897 | 27.939 | 29.056 | 25.968 | 26.745 | 8.522  | 8.160  | 17.074 | 19.269 | 47.574 | 46.850 |
| 390 | R | NA | NA | 43.650 | 45.742 | 25.515 | 27.139 | 40.207 | 39.641 | 49.180 | 49.993 | 42.828 | 43.132 | NA     | NA     | 9.677  | 9.803  | NA     | NA     | 51.771 | 50.396 |
| 391 | L | NA | NA | 47.762 | 47.851 | 23.988 | 25.711 | 40.218 | 39.452 | 54.782 | 55.175 | 31.981 | 31.250 | 30.393 | 31.189 | 15.163 | 13.553 | 15.398 | 15.251 | 39.490 | 42.058 |
| 391 | R | NA | NA | 46.120 | 47.095 | 24.693 | 26.625 | 41.862 | 41.756 | NA     | NA     | NA     | NA     | 30.126 | 29.437 | 12.649 | 10.872 | 19.855 | 20.225 | 41.271 | 47.883 |
| 392 | L | NA | NA | 48.303 | 49.363 | 26.083 | 28.432 | 37.529 | 35.459 | 51.480 | 48.553 | 31.637 | 31.386 | 30.249 | 30.648 | 13.702 | 12.567 | 21.891 | 21.589 | 39.205 | 43.880 |
| 392 | R | NA | NA | 49.724 | 52.827 | 25.420 | 26.919 | 32.526 | 33.203 | 47.789 | 47.975 | NA     | NA     | NA     | NA     | 11.818 | 12.530 | NA     | NA     | 44.883 | 39.597 |
| 393 | L | NA | NA | 47.877 | 50.488 | NA     | NA     | 37.490 | 41.356 | 50.639 | 47.005 | 32.034 | 32.963 | 29.149 | 28.729 | 10.524 | 10.822 | 21.350 | 21.621 | NA     | NA     |
| 393 | R | NA | NA | 46.590 | 45.261 | 24.558 | 28.503 | 38.608 | 37.805 | 48.935 | 48.839 | NA     | NA     | NA     | NA     | NA     | NA     | 23.393 | 23.690 | 46.996 | 45.570 |
| 394 | L | NA | NA | 47.876 | 50.701 | 23.102 | 25.377 | NA     | NA     | 54.378 | 53.840 | 30.407 | 31.308 | 22.379 | 24.392 | 7.354  | 7.150  | 18.473 | 19.016 | 46.487 | 39.642 |
| 394 | R | NA | NA | 44.860 | 43.912 | 28.468 | 30.408 | 37.468 | 40.439 | 50.122 | 50.710 | NA     | 43.354 | 41.434 |
| 395 | L | NA | NA | 44.640 | 44.440 | 25.250 | 28.190 | NA     | NA     | 48.939 | 47.570 | 32.153 | 31.537 | 31.146 | 31.049 | 12.717 | 12.962 | NA     | NA     | 48.009 | 39.037 |
| 395 | R | NA | NA | 48.034 | 47.561 | NA     | NA     | 43.245 | 38.610 | 48.612 | 47.255 | NA     | NA     | NA     | NA     | NA     | NA     | 23.442 | 24.048 | 38.837 | 36.253 |
| 397 | L | NA | NA | 48.060 | 46.981 | 26.667 | 30.146 | 40.727 | 42.399 | 44.457 | 46.450 | NA     | NA     | 29.335 | 29.091 | 12.229 | 12.761 | 15.679 | 14.431 | NA     | NA     |
| 397 | R | NA | NA | 52.429 | 50.334 | 24.697 | 28.468 | 37.877 | 37.712 | 44.127 | 42.812 | 40.564 | 42.105 | 27.909 | 26.937 | NA     | NA     | NA     | NA     | NA     | NA     |
| 398 | L | NA | NA | 50.066 | 51.514 | 27.406 | 25.209 | 38.965 | 40.332 | 56.420 | 54.879 | 33.486 | 32.772 | 32.598 | 32.449 | 5.397  | 4.894  | 19.224 | 19.140 | NA     | NA     |
| 398 | R | NA | NA | 53.617 | 55.258 | 27.805 | 25.451 | 36.206 | 37.209 | 54.429 | 54.379 | NA     |
| 399 | L | NA | NA | 49.643 | 49.939 | NA     | NA     | 36.864 | 34.806 | 54.769 | 58.277 | 32.994 | 33.487 | 34.616 | 34.805 | 12.008 | 10.793 | 12.237 | 13.713 | NA     | NA     |
| 399 | R | NA | NA | 53.982 | 54.689 | 25.732 | 26.502 | 31.715 | 33.563 | 56.833 | 55.539 | NA     | NA     | NA     | NA     | NA     | NA     | 11.341 | 11.218 | NA     | NA     |
| 400 | L | NA | NA | 44.423 | 42.380 | 25.347 | 27.067 | 37.429 | 40.830 | 54.911 | 47.586 | 33.058 | 32.064 | 29.247 | 29.709 | 8.026  | 9.179  | 12.707 | 13.124 | NA     | NA     |
| 400 | R | NA | NA | 42.140 | 40.492 | 19.849 | 23.795 | NA     |
| 401 | L | NA | NA | 48.677 | 49.547 | 23.259 | 27.008 | 41.654 | 40.056 | 50.057 | 47.529 | 29.605 | 30.067 | 33.516 | 32.391 | 9.984  | 10.590 | 21.054 | 19.556 | NA     | NA     |
| 401 | R | NA | NA | 47.818 | 47.309 | NA     | NA     | 41.652 | 39.036 | 50.008 | 49.312 | 38.595 | 38.952 | NA     | NA     | 13.101 | 12.307 | NA     | NA     | NA     | NA     |
| 402 | L | NA | NA | 42.076 | 42.168 | 26.080 | 29.970 | 38.309 | 38.535 | 50.572 | 51.940 | 28.119 | 27.627 | 32.599 | 32.715 | 13.878 | 11.560 | 15.201 | 13.599 | NA     | NA     |
| 402 | R | NA | NA | 40.539 | 41.147 | NA     | NA     | 36.071 | 37.441 | 46.476 | 49.350 | NA     | NA     | NA     | NA     | 15.951 | 15.989 | 12.313 | 12.787 | NA     | NA     |
| 403 | L | NA | NA | 41.312 | 41.523 | 26.095 | 28.395 | 35.820 | 34.723 | 46.572 | 47.884 | 32.991 | 33.442 | 29.670 | 29.646 | 23.329 | 22.871 | 25.263 | 12.245 | NA     | NA     |
| 403 | R | NA | NA | 48.321 | 49.444 | NA     | NA     | 33.515 | 34.385 | 50.244 | 45.807 | NA     | NA     | NA     | NA     | NA     | NA     | 13.640 | 14.662 | NA     | NA     |
| 404 | L | NA | NA | 43.596 | 48.040 | NA     | NA     | 35.997 | 37.194 | NA     | NA     | 27.540 | 29.986 | 28.211 | 29.515 | 14.027 | 13.999 | 26.651 | 24.548 | NA     | NA     |



|     |   |    |    |        |        |        |        |        |        |        |        |        |        |        |        |        |        |        |        |    |    |
|-----|---|----|----|--------|--------|--------|--------|--------|--------|--------|--------|--------|--------|--------|--------|--------|--------|--------|--------|----|----|
| 404 | R | NA | NA | 45.262 | 47.695 | 24.760 | 25.425 | 37.390 | 36.770 | 50.875 | 48.381 | 37.352 | 37.210 | 29.274 | 28.022 | NA     | NA     | NA     | NA     | NA | NA |
| 405 | L | NA | NA | 45.950 | 46.290 | 24.513 | 25.401 | 37.867 | 38.037 | 47.407 | 48.368 | 27.948 | 27.781 | 35.003 | 32.140 | 12.432 | 12.565 | 26.607 | 26.882 | NA | NA |
| 405 | R | NA | NA | 44.943 | 46.889 | NA     | NA     | 37.059 | 37.549 | NA     | NA     | NA     | NA     | 28.555 | 29.104 | NA     | NA     | NA     | NA     | NA | NA |
| 406 | L | NA | NA | 47.004 | 47.346 | 20.909 | 23.789 | 38.181 | 36.651 | 56.159 | 55.023 | 32.110 | 31.932 | NA     | NA     | 9.973  | 10.700 | NA     | NA     | NA | NA |
| 407 | L | NA | NA | 40.489 | 41.363 | NA     | NA     | 43.268 | 42.185 | 51.240 | 51.513 | NA     | NA     | 27.439 | 26.963 | 13.853 | 14.929 | 28.196 | 28.571 | NA | NA |
| 407 | R | NA | NA | 37.821 | 39.245 | 23.464 | 24.853 | NA     | NA     | NA     | NA     | 36.522 | 34.835 | 30.288 | 30.039 | NA     | NA     | NA     | NA     | NA | NA |
| 408 | L | NA | NA | 50.542 | 50.162 | 33.241 | 32.300 | 38.168 | 40.385 | NA     | NA     | 36.080 | 39.037 | 28.322 | 28.006 | NA     | NA     | 19.096 | 17.620 | NA | NA |
| 408 | R | NA | NA | 47.053 | 49.849 | 28.677 | 28.454 | 35.068 | 38.073 | 48.051 | 46.518 | NA     | NA     | NA     | NA     | 15.915 | 16.039 | NA     | NA     | NA | NA |
| 409 | L | NA | NA | 45.732 | 46.105 | 19.525 | 22.775 | 37.867 | 36.971 | 46.093 | 45.031 | 31.097 | 29.146 | 28.845 | 28.763 | 14.645 | 11.703 | NA     | NA     | NA | NA |
| 409 | R | NA | NA | 48.024 | 47.816 | 17.502 | 21.010 | NA     | NA     | 44.686 | 43.240 | NA     | NA     | 28.412 | 28.123 | 14.419 | 13.424 | 31.410 | 31.022 | NA | NA |
| 410 | L | NA | NA | 45.422 | 45.513 | NA     | NA     | 36.401 | 36.317 | 51.101 | 48.507 | 30.299 | 30.890 | 28.291 | 27.749 | NA     | NA     | NA     | NA     | NA | NA |
| 410 | L | NA | NA | 45.422 | 45.513 | NA     | NA     | 36.401 | 36.317 | 51.101 | 48.507 | 30.299 | 30.890 | 28.291 | 27.749 | NA     | NA     | NA     | NA     | NA | NA |
| 410 | R | NA | NA | 46.616 | 48.502 | 23.471 | 26.694 | 36.973 | 37.014 | 47.186 | 46.191 | 39.503 | 38.536 | 31.454 | 31.436 | 10.676 | 11.170 | 21.075 | 21.809 | NA | NA |
| 411 | R | NA | NA | 46.928 | 48.674 | NA     | NA     | 44.357 | 43.216 | 45.664 | 46.864 | 42.106 | 40.777 | 30.196 | 31.008 | 12.903 | 13.192 | NA     | NA     | NA | NA |
| 412 | L | NA | NA | 37.516 | 33.184 | 27.625 | 28.600 | 41.690 | 41.633 | 47.353 | 45.382 | 27.485 | 27.242 | 29.085 | 29.147 | 11.964 | 12.520 | 21.057 | 21.135 | NA | NA |
| 412 | R | NA | NA | 37.058 | 37.654 | 29.541 | 33.452 | NA     | NA     | 43.614 | 43.924 | 34.257 | 35.157 | 30.393 | 29.143 | NA     | NA     | 19.050 | 20.503 | NA | NA |
| 413 | L | NA | NA | 47.639 | 47.047 | 28.123 | 31.283 | 39.668 | 40.087 | 47.596 | 47.990 | 31.381 | 32.237 | 28.350 | 28.108 | 8.653  | 8.609  | 20.093 | 19.174 | NA | NA |
| 419 | L | NA | NA | 45.118 | 47.395 | 29.588 | 29.591 | 39.430 | 40.186 | 50.748 | 49.724 | 32.207 | 31.270 | 31.288 | 31.832 | NA     | NA     | 16.633 | 17.218 | NA | NA |
| 419 | R | NA | NA | 43.761 | 46.362 | NA     | NA     | 38.160 | 39.816 | 49.753 | 50.909 | NA     | NA     | 28.981 | 29.695 | 16.017 | 16.637 | NA     | NA     | NA | NA |
| 420 | L | NA | NA | 52.522 | 55.228 | 24.747 | 25.427 | 40.719 | 41.549 | 51.038 | 52.853 | 31.058 | 31.520 | 29.843 | 29.611 | 14.116 | 14.151 | 25.517 | 27.611 | NA | NA |
| 420 | R | NA | NA | 50.699 | 50.754 | 21.029 | 21.881 | NA     | NA     | 53.324 | 52.619 | NA     | NA     | 27.947 | 28.041 | 11.067 | 11.124 | NA     | NA     | NA | NA |
| 421 | L | NA | NA | 48.698 | 47.475 | NA     | NA     | 39.288 | 39.956 | 44.357 | 44.301 | 32.327 | 32.732 | 30.714 | 32.718 | 12.694 | 13.319 | 15.056 | 14.920 | NA | NA |
| 422 | L | NA | NA | 45.427 | 47.702 | 24.102 | 23.415 | 37.829 | 37.684 | 51.272 | 53.063 | 32.544 | 32.244 | 27.075 | 27.183 | 11.944 | 11.950 | NA     | NA     | NA | NA |
| 425 | L | NA | NA | 53.183 | 50.544 | 23.679 | 26.501 | NA     | NA     | 48.078 | 48.333 | 36.299 | 32.878 | 29.208 | 29.636 | NA     | NA     | 22.802 | 21.193 | NA | NA |
| 425 | R | NA | NA | 46.737 | 48.585 | 24.316 | 24.966 | 41.278 | 42.616 | NA     | NA     | NA     | NA     | 30.371 | 30.417 | 11.701 | 11.755 | NA     | NA     | NA | NA |
| 430 | L | NA | NA | 41.663 | 42.865 | 27.288 | 27.573 | 38.424 | 38.008 | 51.839 | 50.416 | 29.435 | 30.066 | 30.921 | 31.615 | 12.198 | 11.903 | 15.706 | 17.318 | NA | NA |
| 430 | R | NA | NA | 45.985 | 45.685 | 27.944 | 29.205 | 38.781 | 39.814 | 50.736 | 49.332 | NA     | NA     | 34.220 | 34.693 | NA     | NA     | NA     | NA     | NA | NA |
| 431 | L | NA | NA | 48.425 | 49.074 | 25.613 | 27.999 | NA     | NA     | 52.578 | 50.981 | 30.078 | 29.688 | 32.848 | 33.477 | NA     | NA     | 17.015 | 15.206 | NA | NA |
| 432 | L | NA | NA | 47.319 | 48.548 | 22.061 | 25.974 | 36.214 | 37.035 | 49.417 | 51.193 | 30.045 | 31.082 | 34.847 | 35.657 | 10.659 | 10.697 | 23.021 | 22.373 | NA | NA |
| 435 | L | NA | NA | 41.542 | 41.498 | 30.125 | 33.976 | NA     | NA     | 52.964 | 52.310 | 32.880 | 32.814 | 30.473 | 31.191 | 16.994 | 16.799 | 9.720  | 10.894 | NA | NA |
| 438 | R | NA | NA | 44.850 | 45.799 | 25.394 | 27.143 | 37.713 | 37.917 | 50.749 | 50.992 | NA     | NA     | 34.196 | 33.997 | NA     | NA     | NA     | NA     | NA | NA |

|     |   |    |    |        |        |        |        |        |        |        |        |        |        |        |        |        |        |        |        |    |    |
|-----|---|----|----|--------|--------|--------|--------|--------|--------|--------|--------|--------|--------|--------|--------|--------|--------|--------|--------|----|----|
| 439 | R | NA | NA | 46.480 | 48.190 | NA     | NA     | 40.245 | 41.128 | 48.772 | 48.678 | NA     | NA     | 31.744 | 31.552 | 17.366 | 18.602 | 18.657 | 20.124 | NA | NA |
| 443 | L | NA | NA | 53.782 | 49.445 | 27.397 | 27.628 | 35.537 | 38.434 | 46.685 | 49.937 | 28.258 | 28.729 | 31.185 | 31.373 | 13.308 | 14.581 | NA     | NA     | NA | NA |
| 444 | L | NA | NA | 49.612 | 47.846 | 23.206 | 25.433 | 43.334 | 41.292 | 43.431 | 45.807 | 31.618 | 32.543 | 28.526 | 27.651 | 10.559 | 9.873  | 20.968 | 21.710 | NA | NA |
| 444 | R | NA | NA | 49.827 | 46.793 | NA     | NA     | NA     | NA     | 38.098 | 41.167 | NA     | NA     | 29.992 | 29.413 | 15.822 | 15.278 | 23.314 | 17.813 | NA | NA |
| 450 | L | NA | NA | 47.970 | 46.724 | NA     | NA     | NA     | NA     | 52.923 | 50.723 | 30.219 | 29.820 | 31.969 | 30.059 | 11.301 | 11.324 | NA     | NA     | NA | NA |
| 450 | R | NA | NA | 47.437 | 48.346 | 29.024 | 28.797 | 41.291 | 37.718 | 51.134 | 47.404 | 38.042 | 37.391 | 27.385 | 28.107 | 11.141 | 10.906 | 18.874 | 18.960 | NA | NA |
| 451 | R | NA | NA | 53.626 | 52.394 | 31.029 | 31.531 | 39.062 | 39.480 | 44.940 | 45.862 | NA     | NA     | NA     | NA     | 22.387 | 23.346 | NA     | NA     | NA | NA |
| 452 | L | NA | NA | 48.405 | 46.097 | 29.172 | 29.211 | 38.366 | 39.770 | 42.870 | 41.269 | 26.129 | 27.266 | 30.018 | 29.425 | 10.969 | 11.534 | NA     | NA     | NA | NA |
| 452 | R | NA | NA | 50.059 | 50.910 | 27.242 | 27.060 | 37.565 | 39.274 | 47.019 | 48.714 | 41.019 | 41.153 | NA     | NA     | 17.602 | 18.344 | 15.647 | 16.214 | NA | NA |
| 454 | R | NA | NA | 51.276 | 51.205 | 31.379 | 30.844 | NA     | NA     | 52.326 | 53.225 | NA     | NA     | 29.531 | 28.974 | 12.228 | 12.045 | NA     | NA     | NA | NA |
| 457 | L | NA | NA | 43.525 | 44.206 | 32.763 | 33.926 | 37.863 | 40.524 | 43.077 | 40.561 | 31.365 | 31.848 | 31.374 | 30.377 | 7.478  | 9.639  | 20.283 | 19.806 | NA | NA |
| 457 | R | NA | NA | 45.562 | 46.150 | 28.865 | 29.568 | NA     | NA     | 39.372 | 37.168 | NA     | NA     | 33.928 | 33.181 | 10.046 | 10.803 | 24.134 | 25.053 | NA | NA |
| 458 | L | NA | NA | 46.567 | 46.628 | 32.827 | 33.850 | NA     | NA     | 45.953 | 45.563 | 40.278 | 39.235 | 28.778 | 29.191 | 11.508 | 11.834 | NA     | NA     | NA | NA |
| 458 | R | NA | NA | 48.023 | 47.180 | 36.453 | 33.535 | 39.582 | 37.362 | 41.571 | 47.759 | NA     | NA     | NA     | NA     | 17.220 | 16.885 | 21.775 | 20.682 | NA | NA |
| 465 | L | NA | NA | 48.850 | 47.155 | 26.702 | 26.161 | 43.677 | 43.357 | NA     | NA     | 36.744 | 33.029 | 27.399 | 27.425 | 15.052 | 14.330 | 23.078 | 22.235 | NA | NA |
| 465 | R | NA | NA | 48.777 | 48.998 | 30.984 | 27.260 | 40.250 | 42.529 | 38.401 | 42.463 | 46.023 | 44.149 | 27.681 | 28.193 | 13.393 | 12.905 | NA     | NA     | NA | NA |
| 468 | L | NA | NA | 48.207 | 47.355 | 27.668 | 27.861 | 37.982 | 38.463 | 55.658 | 50.438 | NA     | NA | NA |
| 468 | R | NA | NA | 47.509 | 48.853 | 25.700 | 26.900 | 31.548 | 35.276 | 47.139 | 52.037 | 39.526 | 33.898 | 29.162 | 29.968 | 11.381 | 12.039 | 15.871 | 14.972 | NA | NA |
| 472 | R | NA | NA | 45.637 | 46.229 | 28.611 | 29.251 | 37.248 | 35.606 | 34.927 | 41.224 | NA     | NA     | NA     | NA     | 13.390 | 13.820 | 17.952 | 16.089 | NA | NA |
| 473 | L | NA | NA | 52.812 | 53.007 | 26.066 | 25.247 | 39.196 | 40.670 | 45.842 | 47.220 | 36.610 | 33.992 | 32.034 | 32.963 | 11.555 | 11.240 | NA     | NA     | NA | NA |
| 480 | R | NA | NA | 53.313 | 52.892 | 28.435 | 28.029 | 42.921 | 43.812 | 48.122 | 42.905 | 35.911 | 41.537 | 35.644 | 36.209 | 11.100 | 11.078 | 19.748 | 19.610 | NA | NA |
| 481 | L | NA | NA | 49.508 | 50.762 | 31.083 | 30.307 | 43.066 | 39.362 | NA     | NA     | 36.135 | 36.135 | 32.994 | 33.487 | 11.531 | 12.739 | 22.962 | 20.172 | NA | NA |
| 481 | R | NA | NA | 50.143 | 47.981 | NA     | NA     | 35.951 | 36.955 | 46.269 | 50.259 | 34.611 | 34.611 | 34.497 | 35.314 | 7.710  | 8.788  | 19.059 | 16.935 | NA | NA |
| 483 | R | NA | NA | 52.511 | 50.528 | 27.233 | 27.121 | 33.591 | 31.048 | 47.759 | 43.277 | NA     | NA     | 28.666 | 28.305 | NA     | NA     | NA     | NA     | NA | NA |
| 484 | L | NA | NA | 47.825 | 49.037 | 34.928 | 35.278 | 44.211 | 49.734 | NA     | NA     | 33.106 | 35.845 | NA     | NA     | 12.116 | 12.631 | NA     | NA     | NA | NA |
| 484 | R | NA | NA | 47.956 | 48.969 | NA     | NA     | NA     | NA     | NA     | NA     | 38.188 | 41.318 | 26.487 | 26.236 | NA     | NA     | 21.433 | 20.706 | NA | NA |
| 485 | L | NA | NA | 51.498 | 54.377 | 27.378 | 28.238 | 36.791 | 39.295 | NA     | NA     | 40.059 | 39.044 | 28.119 | 27.627 | 12.346 | 12.438 | NA     | NA     | NA | NA |
| 485 | R | NA | NA | 52.208 | 53.162 | 31.139 | 31.782 | 34.432 | 37.145 | NA     | NA     | 39.253 | 42.151 | NA     | NA     | 16.930 | 16.523 | 15.033 | 14.080 | NA | NA |
| 486 | L | NA | NA | 46.620 | 47.991 | NA     | NA     | 38.338 | 38.090 | NA     | NA     | 33.891 | 33.891 | 32.991 | 33.442 | 18.861 | 19.365 | 23.271 | 22.180 | NA | NA |
| 486 | R | NA | NA | 45.663 | 45.807 | 29.448 | 30.075 | 37.971 | 38.893 | NA     | NA     | 35.194 | 35.194 | 27.321 | 29.696 | NA     | NA     | 13.610 | 14.436 | NA | NA |
| 487 | L | NA | NA | 44.031 | 46.180 | 29.663 | 30.084 | 43.194 | 42.062 | NA     | NA     | 32.038 | 34.723 | 27.540 | 29.986 | 12.638 | 14.278 | 19.524 | 19.611 | NA | NA |

|     |   |    |    |        |        |        |        |        |        |    |    |        |        |        |        |        |        |        |        |    |    |
|-----|---|----|----|--------|--------|--------|--------|--------|--------|----|----|--------|--------|--------|--------|--------|--------|--------|--------|----|----|
| 487 | R | NA | NA | 44.001 | 45.670 | NA     | NA     | NA     | NA     | NA | NA | 31.711 | 31.445 | 29.539 | 29.663 | 19.838 | 19.533 | NA     | NA     | NA | NA |
| 488 | L | NA | NA | 42.880 | 45.777 | 26.154 | 26.094 | 35.749 | 35.957 | NA | NA | 30.055 | 34.755 | 27.948 | 27.781 | 9.992  | 10.721 | 22.304 | 23.421 | NA | NA |
| 488 | R | NA | NA | 48.907 | 47.534 | 31.381 | 29.508 | 33.278 | 34.836 | NA | NA | NA     | NA     | 31.177 | 32.862 | 11.253 | 10.107 | NA     | NA     | NA | NA |
| 491 | L | NA | NA | 50.901 | 50.443 | 32.088 | 31.599 | 36.705 | 36.659 | NA | NA | 35.620 | 37.147 | NA     | NA     | 12.633 | 12.810 | 17.453 | 16.761 | NA | NA |
| 491 | R | NA | NA | 48.590 | 47.827 | 28.348 | 27.137 | 35.671 | 38.913 | NA | NA | 32.027 | 39.462 | 31.392 | 30.709 | 14.647 | 14.891 | 16.750 | 18.722 | NA | NA |
| 494 | L | NA | NA | 46.530 | 49.472 | 30.510 | 30.852 | 31.804 | 34.800 | NA | NA | 26.212 | 26.212 | 31.097 | 29.146 | NA     | NA     | 19.767 | 20.649 | NA | NA |
| 499 | L | NA | NA | 49.838 | 49.692 | 29.678 | 29.612 | 31.778 | 31.778 | NA | NA | NA     | NA     | 31.381 | 32.237 | 9.438  | 10.379 | 17.819 | 17.420 | NA | NA |
| 500 | L | NA | NA | 50.676 | 48.981 | 23.850 | 24.334 | 33.942 | 39.051 | NA | NA | NA     | NA     | 29.965 | 29.983 | 10.412 | 10.598 | 16.861 | 16.095 | NA | NA |
| 505 | L | NA | NA | 49.279 | 50.304 | NA     | NA     | 34.143 | 38.076 | NA | NA | NA     | NA     | 32.077 | 32.286 | 15.372 | 14.182 | 10.821 | 6.971  | NA | NA |
| 507 | L | NA | NA | 46.026 | 44.990 | 27.703 | 25.798 | 34.971 | 34.971 | NA | NA | NA     | NA     | 31.058 | 31.520 | NA     | NA     | 8.577  | 10.384 | NA | NA |
| 507 | R | NA | NA | 45.702 | 43.560 | 28.842 | 29.547 | 36.508 | 36.508 | NA | NA | NA     | NA     | 32.345 | 31.974 | 10.296 | 9.419  | 6.353  | 9.766  | NA | NA |
| 509 | R | NA | NA | 48.855 | 48.274 | 26.137 | 26.660 | 33.253 | 33.253 | NA | NA | NA     | NA     | 30.336 | 32.002 | 11.637 | 12.354 | 13.233 | 12.209 | NA | NA |
| 510 | L | NA | NA | 44.107 | 46.354 | 28.927 | 27.965 | 44.053 | 46.396 | NA | NA | NA     | NA     | 27.408 | 27.547 | NA     | NA     | 10.235 | 11.907 | NA | NA |
| 511 | R | NA | NA | 46.693 | 46.222 | 27.043 | 26.703 | 34.753 | 33.927 | NA | NA | NA     | NA     | 30.604 | 29.757 | 11.231 | 11.175 | 5.789  | 6.833  | NA | NA |
| 513 | L | NA | NA | 46.256 | 46.034 | 25.080 | 24.941 | NA     | NA     | NA | NA | NA     | NA     | 30.116 | 29.382 | 16.102 | 15.099 | 14.191 | 14.088 | NA | NA |
| 517 | L | NA | NA | 51.400 | 49.734 | 28.898 | 28.704 | NA     | NA     | NA | NA | NA     | NA     | NA     | NA     | 7.554  | 8.207  | 10.007 | 9.330  | NA | NA |
| 518 | L | NA | NA | 44.402 | 47.671 | 29.044 | 27.459 | NA     | NA     | NA | NA | NA     | NA     | 30.794 | 31.169 | 12.732 | 13.272 | 18.466 | 19.962 | NA | NA |
| 520 | L | NA | NA | 48.746 | 47.792 | 29.999 | 28.077 | NA     | NA     | NA | NA | NA     | NA     | 30.078 | 29.688 | NA     | NA     | 15.256 | 15.419 | NA | NA |
| 521 | L | NA | NA | 47.378 | 49.688 | NA     | NA     | NA     | NA     | NA | NA | NA     | NA     | 30.045 | 31.082 | 9.622  | 12.065 | 5.663  | 7.542  | NA | NA |
| 522 | L | NA | NA | 46.958 | 46.014 | 27.847 | 28.020 | NA     | NA     | NA | NA | NA     | NA     | NA     | NA     | 12.549 | 12.026 | 13.549 | 14.896 | NA | NA |
| 522 | R | NA | NA | 50.041 | 48.893 | 25.433 | 28.314 | NA     | NA     | NA | NA | NA     | NA     | 28.957 | 29.874 | 9.177  | 9.388  | NA     | NA     | NA | NA |
| 523 | L | NA | NA | 49.345 | 47.917 | NA     | NA     | NA     | NA     | NA | NA | NA     | NA     | 33.509 | 33.658 | 6.069  | 7.009  | 16.257 | 19.381 | NA | NA |
| 524 | L | NA | NA | 47.079 | 48.724 | 31.708 | 28.332 | NA     | NA     | NA | NA | NA     | NA     | NA     | NA     | 11.083 | 10.676 | 10.341 | 13.240 | NA | NA |
| 525 | L | NA | NA | 44.707 | 47.272 | 28.106 | 28.615 | NA     | NA     | NA | NA | NA     | NA     | 32.880 | 32.814 | 5.614  | 6.499  | NA     | NA     | NA | NA |
| 525 | R | NA | NA | 49.823 | 51.466 | 27.364 | 28.638 | NA     | NA     | NA | NA | NA     | NA     | NA     | NA     | 13.531 | 13.760 | 15.188 | 16.639 | NA | NA |
| 526 | L | NA | NA | 47.830 | 49.599 | 26.464 | 26.269 | NA     | NA     | NA | NA | NA     | NA     | 27.640 | 26.578 | 13.296 | 14.279 | 12.511 | 12.482 | NA | NA |
| 527 | L | NA | NA | 47.101 | 44.353 | 34.910 | 34.329 | NA     | NA     | NA | NA | NA     | NA     | 29.697 | 29.153 | 10.366 | 11.621 | NA     | NA     | NA | NA |
| 528 | L | NA | NA | 48.280 | 48.654 | 26.218 | 27.109 | NA     | NA     | NA | NA | NA     | NA     | 27.744 | 29.670 | 11.834 | 12.685 | 21.370 | 21.017 | NA | NA |
| 528 | R | NA | NA | 48.164 | 50.357 | 26.587 | 26.937 | NA     | NA     | NA | NA | NA     | NA     | 28.679 | 29.153 | NA     | NA     | 15.680 | 15.791 | NA | NA |
| 530 | L | NA | NA | 44.926 | 45.637 | 28.101 | 30.848 | NA     | NA     | NA | NA | NA     | NA     | 29.074 | 28.787 | 9.952  | 10.189 | 14.103 | 15.257 | NA | NA |
| 531 | L | NA | NA | 46.837 | 46.049 | 31.089 | 30.727 | NA     | NA     | NA | NA | NA     | NA     | 29.199 | 29.548 | 10.909 | 9.158  | 13.915 | 13.915 | NA | NA |

|     |   |    |    |        |        |        |        |    |    |    |    |    |    |        |        |        |        |        |        |    |    |
|-----|---|----|----|--------|--------|--------|--------|----|----|----|----|----|----|--------|--------|--------|--------|--------|--------|----|----|
| 531 | R | NA | NA | 45.363 | 44.271 | 32.305 | 32.570 | NA | NA | NA | NA | NA | NA | 31.403 | 31.623 | 8.018  | 8.765  | 7.817  | 7.817  | NA | NA |
| 532 | L | NA | NA | 49.393 | 48.983 | 29.242 | 28.418 | NA | NA | NA | NA | NA | NA | 31.079 | 31.569 | 17.375 | 17.154 | 10.263 | 11.300 | NA | NA |
| 533 | L | NA | NA | 48.917 | 47.819 | 29.889 | 30.805 | NA | NA | NA | NA | NA | NA | 28.258 | 28.729 | 13.013 | 13.888 | 10.126 | 11.682 | NA | NA |
| 534 | L | NA | NA | 47.152 | 47.136 | 27.983 | 29.474 | NA | NA | NA | NA | NA | NA | 31.618 | 32.543 | 15.638 | 14.973 | 14.377 | 12.889 | NA | NA |
| 535 | L | NA | NA | 48.792 | 47.911 | 29.133 | 28.815 | NA | NA | NA | NA | NA | NA | 30.750 | 31.060 | 10.723 | 10.292 | NA     | NA     | NA | NA |
| 535 | R | NA | NA | 51.299 | 46.784 | 32.374 | 34.461 | NA | NA | NA | NA | NA | NA | 30.315 | 29.923 | 14.216 | 20.117 | 10.106 | 8.794  | NA | NA |
| 536 | L | NA | NA | 50.189 | 49.235 | 33.943 | 33.437 | NA     | NA     | 15.514 | 17.584 | NA     | NA     | NA | NA |
| 536 | R | NA | NA | 48.417 | 47.564 | 31.076 | 34.345 | NA | NA | NA | NA | NA | NA | 27.487 | 27.526 | 19.832 | 15.732 | 8.549  | 11.733 | NA | NA |
| 538 | L | NA | NA | 46.916 | 47.045 | 35.268 | 33.326 | NA | NA | NA | NA | NA | NA | 30.543 | 31.002 | 11.691 | 10.199 | 12.640 | 15.089 | NA | NA |
| 542 | L | NA | NA | 49.131 | 48.037 | 29.391 | 28.409 | NA | NA | NA | NA | NA | NA | 30.212 | 29.838 | 17.575 | 16.314 | NA     | NA     | NA | NA |
| 548 | L | NA | NA | 49.221 | 50.376 | 34.610 | 32.879 | NA | NA | NA | NA | NA | NA | 29.846 | 30.106 | 11.746 | 10.711 | 11.693 | 11.693 | NA | NA |
| 548 | R | NA | NA | 48.669 | 49.517 | NA     | NA     | NA | NA | NA | NA | NA | NA | 31.758 | 31.637 | 13.323 | 12.709 | 16.280 | 26.648 | NA | NA |
| 556 | R | NA | NA | 48.346 | 46.830 | 28.079 | 27.300 | NA | NA | NA | NA | NA | NA | 24.903 | 26.793 | 20.708 | 21.987 | NA     | NA     | NA | NA |
| 557 | R | NA | NA | 42.348 | 41.945 | 29.784 | 29.909 | NA     | NA     | NA     | NA     | NA     | NA     | NA | NA |
| 567 | R | NA | NA | 48.361 | 47.722 | 29.555 | 31.532 | NA | NA | NA | NA | NA | NA | 28.908 | 29.051 | 13.201 | 11.561 | NA     | NA     | NA | NA |
| 570 | R | NA | NA | 47.631 | 46.858 | 20.689 | 20.982 | NA | NA | NA | NA | NA | NA | 31.704 | 29.993 | 8.960  | 11.058 | NA     | NA     | NA | NA |
| 572 | L | NA | NA | 47.615 | 49.026 | 22.470 | 23.720 | NA | NA | NA | NA | NA | NA | 28.411 | 28.873 | 14.881 | 14.044 | NA     | NA     | NA | NA |
| 572 | R | NA | NA | 47.142 | 48.385 | 25.288 | 26.421 | NA | NA | NA | NA | NA | NA | 29.314 | 29.958 | 11.809 | 10.716 | NA     | NA     | NA | NA |
| 573 | L | NA | NA | 47.166 | 47.561 | 29.421 | 29.816 | NA | NA | NA | NA | NA | NA | 33.526 | 30.166 | 20.800 | 19.060 | NA     | NA     | NA | NA |
| 575 | L | NA | NA | 48.361 | 46.468 | 26.238 | 30.792 | NA | NA | NA | NA | NA | NA | 25.041 | 27.202 | 10.468 | 13.445 | NA     | NA     | NA | NA |
| 575 | R | NA | NA | 46.872 | 44.701 | 31.865 | 32.194 | NA | NA | NA | NA | NA | NA | 27.097 | 27.744 | 12.501 | 11.129 | NA     | NA     | NA | NA |
| 586 | L | NA | NA | 49.063 | 47.202 | NA     | NA     | NA | NA | NA | NA | NA | NA | 27.314 | 27.454 | 14.256 | 12.322 | NA     | NA     | NA | NA |
| 586 | R | NA | NA | 51.439 | 50.978 | 31.392 | 31.287 | NA | NA | NA | NA | NA | NA | 27.639 | 30.179 | 13.723 | 15.521 | NA     | NA     | NA | NA |
| 587 | L | NA | NA | 48.210 | 47.763 | 30.409 | 29.437 | NA     | NA     | 13.328 | 13.949 | NA     | NA     | NA | NA |
| 589 | L | NA | NA | 46.976 | 46.957 | 29.450 | 30.631 | NA | NA | NA | NA | NA | NA | 35.168 | 35.873 | 7.000  | 9.768  | NA     | NA     | NA | NA |
| 589 | R | NA | NA | 46.153 | 45.980 | 31.567 | 29.561 | NA | NA | NA | NA | NA | NA | 31.522 | 34.219 | 11.184 | 11.750 | NA     | NA     | NA | NA |
| 591 | L | NA | NA | 52.713 | 52.420 | NA     | NA     | NA | NA | NA | NA | NA | NA | 30.507 | 29.596 | 15.844 | 16.851 | NA     | NA     | NA | NA |
| 591 | R | NA | NA | 49.895 | 52.790 | 28.230 | 28.835 | NA | NA | NA | NA | NA | NA | 25.326 | 25.032 | 13.494 | 13.856 | NA     | NA     | NA | NA |
| 592 | R | NA | NA | 50.783 | 52.239 | 26.919 | 27.316 | NA     | NA     | 11.895 | 13.543 | NA     | NA     | NA | NA |
| 594 | L | NA | NA | 44.850 | 44.975 | NA     | NA     | NA | NA | NA | NA | NA | NA | 25.728 | 28.555 | NA     | NA     | NA     | NA     | NA | NA |
| 594 | R | NA | NA | 42.321 | 41.668 | 30.771 | 32.467 | NA | NA | NA | NA | NA | NA | 27.246 | 28.590 | 11.237 | 16.354 | NA     | NA     | NA | NA |



|     |   |    |    |    |    |        |        |        |        |        |        |        |        |        |        |        |        |        |        |        |        |
|-----|---|----|----|----|----|--------|--------|--------|--------|--------|--------|--------|--------|--------|--------|--------|--------|--------|--------|--------|--------|
| 112 | L | NA | NA | NA | NA | 27.269 | 27.119 | NA     | NA     | 46.766 | 47.015 | 31.567 | 30.899 | 29.640 | 30.338 | 13.101 | 12.446 | NA     | NA     | 60.741 | 64.062 |
| 159 | R | NA | NA | NA | NA | 26.021 | 22.562 | 37.682 | 34.700 | NA     | NA     | 37.438 | 36.766 | 31.067 | 30.385 | 10.875 | 11.475 | 16.829 | 20.097 | 59.773 | 60.554 |
| 239 | R | NA | NA | NA | NA | 30.848 | 31.329 | 43.610 | 43.013 | 47.377 | 50.103 | 36.625 | 38.646 | 29.539 | 30.646 | 13.531 | 17.184 | 19.117 | 18.361 | 65.159 | 60.722 |
| 265 | L | NA | NA | NA | NA | 34.983 | 35.110 | NA     | NA     | 51.283 | 56.221 | 36.440 | 37.184 | 30.344 | 32.553 | 7.359  | 7.400  | NA     | NA     | 60.816 | 60.193 |
| 299 | R | NA | NA | NA | NA | 27.827 | 29.613 | NA     | NA     | 47.247 | 46.915 | 39.893 | 39.231 | 25.755 | 25.755 | 9.937  | 10.390 | 4.137  | 5.554  | 64.189 | 62.085 |
| 338 | L | NA | NA | NA | NA | 30.656 | 30.412 | 39.802 | 40.407 | 53.904 | 52.134 | 40.572 | 36.399 | 31.199 | 32.644 | 14.565 | 14.916 | 12.900 | 15.841 | 60.562 | 59.910 |
| 424 | L | NA | NA | NA | NA | 29.226 | 28.948 | 36.916 | 37.686 | 53.084 | 52.493 | 33.650 | 34.870 | NA     | NA     | 9.666  | 11.767 | 17.028 | 18.037 | NA     | NA     |
| 613 | L | NA | NA | NA | NA | 29.712 | 30.288 | NA     | 10.302 | 12.493 | NA     | NA     | NA     | NA     |
| 12  | L | NA | NA | NA | NA | 34.720 | 33.172 | 44.674 | 43.840 | NA     | NA     | 35.714 | 35.648 | NA     | NA     | NA     | NA     | 24.492 | 21.598 | NA     | NA     |
| 39  | L | NA | NA | NA | NA | 31.486 | 31.917 | 42.675 | 40.582 | 52.482 | 54.497 | 34.695 | 38.538 | NA     | NA     | NA     | NA     | 17.607 | 16.667 | 61.577 | 61.097 |
| 41  | L | NA | NA | NA | NA | 31.489 | 33.176 | NA     | NA     | 50.080 | 49.079 | NA     | NA     | 29.331 | 27.140 | 21.998 | 21.948 | NA     | NA     | NA     | NA     |
| 53  | L | NA | NA | NA | NA | 28.104 | 27.868 | NA     | NA     | 53.584 | 54.568 | 34.891 | 35.151 | 30.680 | 31.423 | 12.218 | 12.235 | NA     | NA     | 57.364 | 62.032 |
| 63  | L | NA | NA | NA | NA | 32.705 | 31.281 | 38.686 | 41.156 | NA     | NA     | 34.790 | 38.717 | 28.603 | 29.617 | 10.691 | 10.157 | 23.162 | 24.706 | 63.200 | 62.065 |
| 84  | L | NA | NA | NA | NA | 28.526 | 27.657 | 39.285 | 43.858 | 52.419 | 53.849 | 29.993 | 29.066 | 29.386 | 29.226 | 12.628 | 12.666 | 21.017 | 23.069 | 62.647 | 62.642 |
| 91  | L | NA | NA | NA | NA | 29.012 | 27.211 | 41.510 | 38.032 | 47.312 | 48.414 | 31.607 | 34.032 | NA     | NA     | 15.773 | 16.164 | 22.484 | 19.439 | 58.552 | 61.289 |
| 106 | R | NA | NA | NA | NA | 33.196 | 32.522 | 38.756 | 37.805 | 45.921 | 45.997 | NA     | NA     | NA     | NA     | 9.007  | 8.752  | NA     | NA     | NA     | NA     |
| 134 | L | NA | NA | NA | NA | 34.333 | 34.205 | NA     | NA     | 51.166 | 52.187 | NA     | NA     | 29.923 | 30.818 | 17.752 | 11.734 | 20.899 | 20.478 | 62.241 | 61.018 |
| 139 | L | NA | NA | NA | NA | 30.394 | 29.953 | NA     | NA     | 53.473 | 52.432 | NA     | NA     | NA     | NA     | 10.907 | 11.189 | 20.798 | 22.022 | 55.952 | 57.037 |
| 139 | L | NA | NA | NA | NA | 30.394 | 29.953 | NA     | NA     | 53.473 | 52.432 | NA     | NA     | NA     | NA     | 10.907 | 11.189 | 22.486 | 22.884 | 55.952 | 57.037 |
| 142 | R | NA | NA | NA | NA | 31.724 | 31.920 | 38.590 | 41.698 | NA     | NA     | 37.798 | 39.358 | 31.086 | 30.238 | 13.216 | 12.014 | 28.462 | 27.831 | NA     | NA     |
| 150 | R | NA | NA | NA | NA | 31.975 | 32.427 | 41.926 | 41.851 | NA     | NA     | NA     | NA     | 31.372 | 32.063 | 10.791 | 11.409 | 20.582 | 17.257 | 61.909 | 63.839 |
| 154 | R | NA | NA | NA | NA | 30.177 | 30.541 | NA     | NA     | 49.568 | 46.509 | NA     | NA     | 31.672 | 32.459 | 15.208 | 14.590 | 17.946 | 18.885 | 69.343 | 67.880 |
| 163 | L | NA | NA | NA | NA | 28.740 | 28.392 | 41.305 | 40.165 | 48.799 | 49.084 | 35.417 | 34.362 | NA     | NA     | 14.075 | 14.638 | NA     | NA     | 62.804 | 65.992 |
| 173 | L | NA | NA | NA | NA | 30.373 | 29.406 | 40.470 | 43.536 | 48.553 | 50.253 | 37.505 | 35.935 | NA     | NA     | NA     | NA     | 17.208 | 17.755 | 56.702 | 60.422 |
| 184 | L | NA | NA | NA | NA | 27.644 | 27.240 | 43.367 | 44.162 | NA     | NA     | 40.846 | 40.271 | 30.353 | 29.969 | 11.756 | 11.767 | 23.749 | 22.826 | 45.231 | 42.904 |
| 192 | L | NA | NA | NA | NA | 31.435 | 32.613 | 42.598 | 42.409 | 60.109 | 56.893 | 36.886 | 36.131 | 30.135 | 29.367 | 11.861 | 12.150 | 21.656 | 22.017 | NA     | NA     |
| 207 | L | NA | NA | NA | NA | 28.405 | 28.197 | 41.735 | 39.017 | 59.509 | 60.308 | 35.368 | 36.119 | NA     | NA     | 13.733 | 14.628 | 16.103 | 15.284 | 58.162 | 58.857 |
| 208 | R | NA | NA | NA | NA | 26.787 | 27.141 | 41.564 | 40.798 | NA     | NA     | 30.389 | 34.708 | 28.362 | 28.746 | 14.147 | 13.493 | 17.913 | 20.375 | 38.734 | 42.145 |
| 209 | L | NA | NA | NA | NA | 27.546 | 27.547 | NA     | NA     | 46.924 | 50.196 | 33.759 | 36.845 | 30.966 | 30.860 | 13.894 | 13.456 | NA     | NA     | 40.730 | 40.652 |
| 223 | R | NA | NA | NA | NA | 30.210 | 29.345 | 38.355 | 39.514 | NA     | NA     | 31.420 | 34.261 | 31.088 | 32.384 | 9.595  | 9.949  | 16.593 | 16.561 | 68.037 | 70.480 |
| 235 | R | NA | NA | NA | NA | 27.014 | 26.572 | 39.300 | 37.592 | 35.235 | 38.485 | 32.369 | 31.460 | 32.557 | 32.140 | 11.580 | 11.453 | 13.800 | 14.281 | 64.593 | 59.814 |

|     |   |    |    |    |    |        |        |        |        |        |        |        |        |        |        |        |        |        |        |        |        |
|-----|---|----|----|----|----|--------|--------|--------|--------|--------|--------|--------|--------|--------|--------|--------|--------|--------|--------|--------|--------|
| 238 | L | NA | NA | NA | NA | 30.250 | 39.324 | 34.023 | 35.788 | 41.273 | 40.845 | 36.179 | 31.723 | 28.353 | 28.610 | 11.747 | 11.628 | NA     | NA     | NA     | NA     |
| 247 | R | NA | NA | NA | NA | 24.536 | 22.664 | NA     | NA     | 43.709 | 48.621 | 31.711 | 31.445 | 27.725 | 29.739 | 15.057 | 14.039 | NA     | NA     | 65.306 | 65.453 |
| 251 | L | NA | NA | NA | NA | 32.540 | 33.455 | 36.791 | 39.295 | 41.907 | 40.701 | 35.620 | 37.147 | 31.092 | 31.608 | 12.330 | 11.813 | 23.063 | 20.692 | 64.026 | 65.168 |
| 259 | R | NA | NA | NA | NA | 31.213 | 29.576 | 31.934 | 31.934 | 47.759 | 43.277 | 31.416 | 31.810 | 25.914 | 26.091 | NA     | NA     | 14.996 | 14.837 | 56.812 | 56.752 |
| 263 | L | NA | NA | NA | NA | 26.070 | 25.726 | NA     | NA     | 55.008 | 54.738 | 38.422 | 37.219 | 31.712 | 31.880 | 14.768 | 14.835 | 10.007 | 9.330  | 60.152 | 58.930 |
| 267 | L | NA | NA | NA | NA | 28.367 | 29.098 | 42.119 | 40.192 | 52.029 | 52.277 | 35.871 | 38.667 | NA     | NA     | 13.702 | 14.220 | 5.663  | 7.542  | 63.829 | 69.233 |
| 282 | L | NA | NA | NA | NA | 25.693 | 26.944 | 37.174 | 36.790 | 58.531 | 54.479 | NA     | NA     | NA     | NA     | 14.881 | 14.044 | 16.945 | 16.945 | 58.517 | 57.320 |
| 286 | L | NA | NA | NA | NA | 29.219 | 27.082 | 39.868 | 36.593 | 57.089 | 54.376 | NA     | NA     | 27.533 | 27.497 | 10.468 | 13.445 | 27.790 | 27.551 | 59.288 | 59.646 |
| 289 | L | NA | NA | NA | NA | 32.149 | 30.250 | 43.428 | 42.374 | NA     | NA     | 39.480 | 42.875 | 27.314 | 28.570 | 11.741 | 11.783 | NA     | NA     | 59.517 | 60.747 |
| 291 | L | NA | NA | NA | NA | 29.966 | 26.918 | 43.841 | 41.213 | 52.306 | 51.880 | 31.856 | 31.841 | 28.411 | 28.873 | 10.077 | 9.452  | 14.986 | 17.212 | 62.188 | 61.051 |
| 295 | L | NA | NA | NA | NA | 28.753 | 29.502 | 43.936 | 42.047 | 54.684 | 56.420 | NA     | NA     | 26.807 | 27.925 | 11.958 | 12.984 | 11.693 | 11.693 | 63.866 | 61.404 |
| 308 | R | NA | NA | NA | NA | 31.721 | 34.703 | 35.924 | 34.944 | 54.704 | 55.068 | 33.232 | 33.519 | NA     | NA     | NA     | NA     | 15.466 | 15.224 | 63.731 | 62.683 |
| 311 | L | NA | NA | NA | NA | 31.701 | 31.387 | 36.408 | 36.990 | 60.645 | 63.841 | NA     | NA     | NA     | NA     | 8.688  | 8.688  | NA     | NA     | 60.103 | 58.403 |
| 314 | L | NA | NA | NA | NA | 28.372 | 29.753 | 39.364 | 38.502 | 53.326 | 53.123 | 32.611 | 31.050 | 22.734 | 23.979 | 8.293  | 9.731  | 15.341 | 17.114 | 62.174 | 64.131 |
| 324 | L | NA | NA | NA | NA | 26.756 | 27.029 | 45.396 | 41.770 | 48.345 | 51.808 | 38.768 | 41.232 | 27.465 | 28.718 | NA     | NA     | 16.187 | 14.311 | 65.114 | 60.545 |
| 335 | R | NA | NA | NA | NA | 22.299 | 23.826 | 39.442 | 34.511 | 46.722 | 46.255 | 40.387 | 40.875 | NA     | NA     | 13.428 | 14.771 | 15.488 | 17.092 | 65.284 | 63.614 |
| 337 | L | NA | NA | NA | NA | 22.637 | 23.749 | 34.725 | 37.242 | 52.246 | 54.117 | 32.056 | 31.976 | 30.155 | 30.339 | NA     | NA     | NA     | NA     | 60.471 | 61.516 |
| 341 | L | NA | NA | NA | NA | 21.704 | 23.750 | 35.351 | 36.399 | 43.393 | 51.283 | 31.288 | 31.832 | NA     | NA     | 10.576 | 11.028 | 12.083 | 10.805 | 53.940 | 53.768 |
| 342 | L | NA | NA | NA | NA | 23.774 | 24.518 | NA     | NA     | 45.563 | 44.204 | 29.843 | 29.611 | 30.564 | 33.796 | 6.806  | 7.909  | 20.285 | 19.522 | 66.218 | 65.101 |
| 343 | L | NA | NA | NA | NA | 20.248 | 24.015 | 41.673 | 42.304 | 54.171 | 54.378 | NA     | NA     | 28.681 | 30.947 | 10.546 | 10.406 | 19.362 | 19.848 | 66.049 | 66.755 |
| 344 | L | NA | NA | NA | NA | 25.500 | 23.017 | 35.580 | 36.444 | 49.710 | 52.727 | 30.714 | 32.718 | NA     | NA     | 15.478 | 15.415 | 15.836 | 14.176 | 65.481 | 62.223 |
| 345 | L | NA | NA | NA | NA | 28.083 | 27.761 | 38.369 | 38.848 | 50.268 | 50.436 | 27.075 | 27.183 | 30.705 | 31.377 | 10.614 | 10.382 | 9.409  | 9.875  | 62.170 | 63.794 |
| 348 | R | NA | NA | NA | NA | 28.355 | 26.707 | 41.533 | 41.134 | NA     | NA     | NA     | NA     | 31.411 | 30.885 | 12.630 | 12.139 | 15.443 | 13.471 | 60.205 | 62.778 |
| 352 | L | NA | NA | NA | NA | 19.854 | 20.480 | 40.256 | 40.846 | 53.645 | 54.184 | 30.921 | 31.615 | 26.728 | 28.032 | 10.527 | 10.211 | 13.032 | 14.690 | 63.559 | 63.650 |
| 357 | L | NA | NA | NA | NA | 23.091 | 23.205 | 40.985 | 39.338 | 49.248 | 48.354 | 25.872 | 26.729 | 34.086 | 34.389 | 8.910  | 11.313 | 14.626 | 13.676 | 32.152 | 26.850 |
| 357 | L | NA | NA | NA | NA | 23.091 | 23.205 | 40.985 | 39.338 | 49.248 | 48.354 | 25.872 | 26.729 | 34.086 | 34.389 | 8.910  | 11.313 | 14.626 | 13.676 | 32.152 | 26.850 |
| 359 | R | NA | NA | NA | NA | 17.873 | 19.205 | 37.786 | 37.688 | 51.929 | 52.993 | NA     | NA     | NA     | NA     | 11.923 | 15.641 | NA     | NA     | NA     | NA     |
| 362 | L | NA | NA | NA | NA | 25.459 | 27.098 | 37.287 | 37.343 | 48.133 | 47.875 | NA     | NA     | 27.192 | 26.670 | 14.574 | 14.138 | 18.958 | 18.067 | 53.499 | 57.788 |
| 366 | R | NA | NA | NA | NA | 19.691 | 19.691 | 40.560 | 38.400 | NA     | 19.337 | 20.966 | 48.712 | 40.657 |
| 369 | L | NA | NA | NA | NA | 24.165 | 25.771 | 38.498 | 39.431 | 49.646 | 50.367 | 28.686 | 29.034 | 32.205 | 30.598 | 11.823 | 12.034 | NA     | NA     | 41.401 | 41.415 |
| 372 | L | NA | NA | NA | NA | 21.125 | 21.125 | 40.469 | 37.158 | 52.746 | 51.588 | 31.969 | 30.059 | 28.927 | 29.044 | 14.244 | 14.602 | 13.064 | 13.936 | 45.076 | 43.133 |

|     |   |    |    |    |    |        |        |        |        |        |        |        |        |        |        |        |        |        |        |        |        |
|-----|---|----|----|----|----|--------|--------|--------|--------|--------|--------|--------|--------|--------|--------|--------|--------|--------|--------|--------|--------|
| 379 | L | NA | NA | NA | NA | 20.501 | 24.367 | 40.221 | 40.386 | 50.263 | 49.166 | NA     | NA     | 30.346 | 30.635 | 12.324 | 14.075 | 19.145 | 19.574 | 50.040 | 40.149 |
| 383 | L | NA | NA | NA | NA | 20.199 | 23.724 | 34.563 | 37.267 | NA     | NA     | 31.884 | 31.524 | 29.129 | 28.349 | 10.032 | 10.380 | 23.073 | 23.139 | 49.889 | 47.846 |
| 387 | L | NA | NA | NA | NA | 21.121 | 24.173 | 39.213 | 37.264 | 52.756 | 52.323 | 40.355 | 38.803 | 28.218 | 27.667 | 10.648 | 10.909 | 17.420 | 17.033 | 45.580 | 44.481 |
| 406 | R | NA | NA | NA | NA | 23.328 | 26.100 | 33.739 | 33.043 | NA     | NA     | NA     | NA     | 26.656 | 26.560 | NA     | NA     | 24.861 | 24.066 | NA     | NA     |
| 411 | L | NA | NA | NA | NA | 22.529 | 25.007 | 42.317 | 42.357 | 46.031 | 43.716 | 27.354 | 27.686 | NA     | NA     | 8.641  | 7.957  | 22.541 | 21.540 | NA     | NA     |
| 480 | L | NA | NA | NA | NA | 29.451 | 30.927 | 48.452 | 44.224 | 40.685 | 45.556 | 29.973 | 36.933 | 33.486 | 32.772 | NA     | NA     | 23.549 | 21.965 | NA     | NA     |
| 537 | L | NA | NA | NA | NA | 30.930 | 28.149 | NA     | NA     | NA     | NA     | NA     | NA     | 30.292 | 29.665 | 3.932  | 3.974  | 16.945 | 16.945 | NA     | NA     |
| 549 | L | NA | NA | NA | NA | 32.896 | 32.328 | NA     | NA     | NA     | NA     | NA     | NA     | 27.605 | 27.115 | 16.881 | 16.183 | 17.744 | 17.673 | NA     | NA     |
| 565 | L | NA | NA | NA | NA | 30.542 | 32.478 | NA     | NA     | NA     | NA     | NA     | NA     | 29.630 | 29.045 | NA     | NA     | NA     | NA     | NA     | NA     |
| 592 | L | NA | NA | NA | NA | 27.986 | 26.675 | NA     | NA     | NA     | NA     | NA     | NA     | 27.564 | 27.686 | 12.368 | 11.318 | NA     | NA     | NA     | NA     |
| 597 | R | NA | NA | NA | NA | 33.322 | 31.437 | NA     | NA     | NA     | NA     | NA     | NA     | 25.415 | 26.684 | 9.269  | 16.082 | NA     | NA     | NA     | NA     |
| 616 | L | NA | NA | NA | NA | 31.035 | 32.476 | NA     | 8.625  | 8.625  | NA     | NA     | NA     | NA     |
| 675 | R | NA | NA | NA | NA | 20.969 | 26.738 | NA     |
| 676 | L | NA | NA | NA | NA | 21.125 | 21.125 | NA     |
| 676 | R | NA | NA | NA | NA | 17.788 | 17.788 | NA     |
| 677 | L | NA | NA | NA | NA | 22.254 | 23.042 | NA     |
| 677 | R | NA | NA | NA | NA | 34.782 | 32.489 | NA     |
| 685 | L | NA | NA | NA | NA | 20.501 | 24.367 | NA     |
| 685 | R | NA | NA | NA | NA | 19.059 | 24.396 | NA     |
| 413 | R | NA | NA | NA | NA | NA     | NA     | 38.642 | 38.867 | NA     | NA     | NA     | NA     | 27.077 | 27.065 | 8.672  | 8.491  | 18.482 | 17.887 | NA     | NA     |
| 131 | L | NA | NA | NA | NA | NA     | NA     | 38.862 | 38.581 | 55.352 | 55.836 | 29.449 | 30.158 | 28.584 | 28.187 | 13.265 | 12.815 | NA     | NA     | 55.767 | 57.123 |
| 212 | L | NA | NA | NA | NA | NA     | NA     | 37.827 | 40.738 | NA     | NA     | NA     | NA     | 27.392 | 29.628 | 15.814 | 17.579 | 21.255 | 22.652 | 40.070 | 39.699 |
| 214 | L | NA | NA | NA | NA | NA     | NA     | 35.249 | 37.567 | 51.249 | 50.399 | NA     | NA     | 28.815 | 28.708 | 16.166 | 14.657 | 20.938 | 20.969 | 39.490 | 42.058 |
| 323 | L | NA | NA | NA | NA | NA     | NA     | 37.304 | 34.619 | 48.032 | 49.108 | 38.911 | 39.099 | 30.179 | 30.684 | 9.181  | 7.678  | 11.562 | 15.372 | 67.623 | 66.991 |
| 331 | R | NA | NA | NA | NA | NA     | NA     | 32.596 | 35.577 | 49.907 | 50.296 | 40.359 | 37.792 | 29.818 | 30.421 | 7.128  | 6.219  | 16.098 | 16.714 | 54.670 | 59.389 |
| 168 | L | NA | NA | NA | NA | NA     | NA     | NA     | NA     | 51.168 | 48.468 | 26.952 | 28.649 | 29.600 | 29.434 | 16.370 | 16.704 | 20.013 | 20.262 | NA     | NA     |
| 218 | L | NA | NA | NA | NA | NA     | NA     | NA     | NA     | 50.835 | 53.275 | 34.940 | 34.515 | NA     | NA     | 17.399 | 11.573 | 16.172 | 15.824 | NA     | NA     |
| 222 | L | NA | NA | NA | NA | NA     | NA     | NA     | NA     | 34.589 | 35.737 | 32.067 | 33.265 | 34.851 | 35.793 | 14.334 | 14.947 | 21.481 | 19.967 | 59.243 | 56.720 |
| 556 | L | NA | NA | NA | NA | NA     | NA     | NA     | NA     | NA     | NA     | NA     | NA     | 24.272 | 26.728 | 11.664 | 11.825 | NA     | NA     | NA     | NA     |



Table S3. Embryonic day of appearance for landmark sulci.

| Sulcus | Day |
|--------|-----|
| lf     | 70  |
| cs     | 90  |
| sts    | 85  |
| iar    | 95  |
| lu     | 100 |
| ips    | 100 |
| ps     | 110 |
| arsp   | 120 |
| sar    | 120 |
| spcd   | 135 |
